# Supplementary material for: Copper-catalyzed 1,4-alkylarylation of 1,3-enynes with masked alkyl electrophiles
Source: Royal Society of Chemistry journal article supplement (doi:10.1039/c8sc05689g), 2019-01-01

## Supporting Information

### Copper-Catalyzed 1,4-Alkylarylation of 1,3-Enynes Masked Alkyl Electrophiles

Changqing Ye,<sup>[a,b]</sup> Yajun Li,<sup>[a]</sup> Xiaotao Zhu,<sup>[a]</sup> Shengmin Hu,<sup>[a]</sup> Daqiang Yuan<sup>[a]</sup> and  
Hongli Bao\*<sup>[a,b]</sup>

<sup>[a]</sup> Key Laboratory of Coal to Ethylene Glycol and Its Related Technology, State Key Laboratory of Structural Chemistry, Center for Excellence in Molecular Synthesis Fujian Institute of Research on the Structure of Matter 155 Yangqiao Road West, Fuzhou, Fujian 350002, P. R. China.

<sup>[b]</sup> University of Chinese Academy of Sciences, No.19(A) Yuquan Road, Shijingshan District, Beijing 100049, P. R. China

*E-mail: hlbao@fjirsm.ac.cn*

|                                                              |    |
|--------------------------------------------------------------|----|
| Materials and methods .....                                  | 3  |
| Synthesis of 1,3-enynes .....                                | 4  |
| Characterization data for 1,3-enynes .....                   | 5  |
| Synthesis of alkyl diacyl peroxides.....                     | 9  |
| Characterization data for diacyl peroxides .....             | 10 |
| Optimization of the reaction conditions.....                 | 12 |
| General procedure for Table S1: .....                        | 12 |
| General procedure for 1,4-alkylarylation of 1,3-enynes ..... | 13 |
| General procedure A .....                                    | 13 |
| General procedure B .....                                    | 13 |
| Characterization data for products .....                     | 14 |
| Synthetic applications .....                                 | 29 |
| a) Synthesis of indenyl iodide 7 with NIS .....              | 29 |
| b) Synthesis of 1 <i>H</i> -indene 8.....                    | 30 |
| c) Synthesis of 2 <i>H</i> -pyran 9 .....                    | 31 |
| d) Synthesis of 2 <i>H</i> -pyran 10 .....                   | 31 |
| Preliminary mechanism study.....                             | 33 |
| a) Radical trapping experiment.....                          | 33 |
| b) Radical clock experiments.....                            | 33 |
| c) Radical dimerization .....                                | 36 |
| Single crystal data of 20.....                               | 37 |
| Reference .....                                              | 38 |
| NMR spectra .....                                            | 39 |

# Materials and methods

All reactions were carried out under an atmosphere of nitrogen in an flame-dried glassware with magnetic stirring unless otherwise indicated. Commercially obtained reagents were used as received. Solvents were dried by Innovative Technology Solvent Purification System. Liquids and solutions were transferred via syringe. All reactions were monitored by thin-layer chromatography. GC-MS data were recorded on Thermo ISQ QD.  $^1\text{H}$ ,  $^{19}\text{F}$ , and  $^{13}\text{C}$  NMR spectra were recorded on Bruker-BioSpin AVANCE III HD and JEOL ECZ600S. Data for  $^1\text{H}$  NMR spectra are reported relative to TMS as an internal standard (0.00 ppm) and are reported as follows: chemical shift (ppm), multiplicity, coupling constant (Hz), and integration. Data for  $^{13}\text{C}$  NMR spectra are reported relative to chloroform as an internal standard (77.16 ppm) and are reported in terms of chemical shift (ppm). HRMS data were recorded on Thermo Fisher Scientific LTQ FTICR-MS, Waters Micromass GCT Premier or Thermo Finnigan DECAX-30000 LCQ Deca XP.

# Synthesis of 1,3-enynes

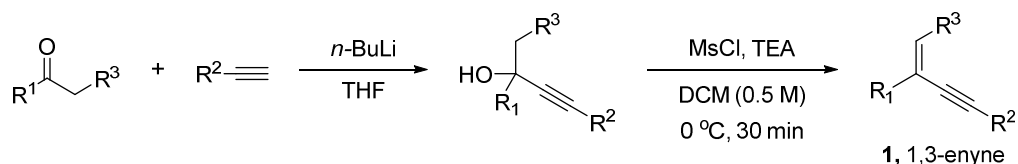

To a 50 mL round bottomed flask was charged with terminal alkyne (5 mmol, 1 equiv) and 10 mL of THF. The solution was cooled to  $-78^\circ\text{C}$  and *n*-BuLi (2.5 M in THF, 2 mL, 5 mmol, 1 equiv) was added. The resulting solution was stirred for 20 minutes at room temperature and then cooled to  $-78^\circ\text{C}$  again. Ketone (5 mmol, 1 equiv) in THF solution was added dropwise. The reaction mixture was then allowed to warm to room temperature and was monitored by TLC for completion. On completion the reaction was quenched with saturated aqueous  $\text{NH}_4\text{Cl}$  (40 mL). The aqueous layer was extracted with ethyl acetate and the combined organic layers were washed with brine (30 mL), dried over  $\text{MgSO}_4$  and filtered. Then concentrated under reduced pressure to afford the crude propargyl alcohol<sup>1</sup>.

The resulting crude propargyl alcohol was dissolved in dry DCM (40 mL), and the mixture was cooled to  $0^\circ\text{C}$  with a cooling bath. To this solution was added TEA (25 mmol, 5 equiv) and methanesulfonyl chloride (12.5 mmol, 2.5 equiv) sequentially. After 30 min the reaction was monitored by TLC for completion. Once completion the reaction was quenched with saturated aqueous  $\text{NH}_4\text{Cl}$  (40 mL). The aqueous layer was extracted with ethyl acetate and the combined organic layers were washed with brine (30 mL), dried over  $\text{MgSO}_4$ , filtered, and concentrated under reduced pressure. The crude material was purified by flash chromatography to yield the 1,3-enyne<sup>2</sup>.

# Characterization data for 1,3-enynes

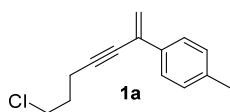

$^1\text{H}$  NMR (400 MHz, Chloroform-*d*)  $\delta$  7.49 (d,  $J = 8.0$  Hz, 2H), 7.15 (d,  $J = 7.9$  Hz, 2H), 5.82 (s, 1H), 5.54 (s, 1H), 3.70 (t,  $J = 6.4$  Hz, 2H), 2.61 (t,  $J = 6.8$  Hz, 2H), 2.35 (s, 3H), 2.05 (p,  $J = 6.6$  Hz, 2H).  $^{13}\text{C}$  NMR (100 MHz, Chloroform-*d*)  $\delta$  138.15, 134.78, 130.47, 129.05, 125.91, 119.14, 89.42, 80.90, 43.81, 31.43, 21.20, 16.88. HRMS (EI+) calcd for  $[\text{C}_{14}\text{H}_{15}\text{Cl}]^+$  ( $[\text{M}]^+$ ): 218.0862, found: 218.0867.

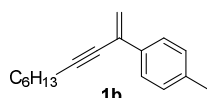

$^1\text{H}$  NMR (400 MHz, Chloroform-*d*)  $\delta$  7.55 (d,  $J = 8.2$  Hz, 2H), 7.14 (d,  $J = 7.9$  Hz, 2H), 5.79 (s, 1H), 5.52 (s, 1H), 2.40 (t,  $J = 7.1$  Hz, 2H), 2.35 (s, 3H), 1.66 – 1.54 (m, 2H), 1.51 – 1.39 (m, 2H), 1.37 – 1.27 (m, 4H), 0.94 – 0.86 (m, 3H).  $^{13}\text{C}$  NMR (100 MHz, Chloroform-*d*)  $\delta$  137.98, 135.03, 130.77, 128.96, 125.97, 118.47, 91.88, 79.88, 31.39, 28.74, 28.68, 22.61, 21.18, 19.44, 14.10. HRMS (EI+) calcd for  $[\text{C}_{17}\text{H}_{22}]^+$  ( $[\text{M}]^+$ ): 226.1722, found: 226.1730.

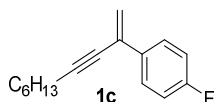

$^1\text{H}$  NMR (600 MHz, Chloroform-*d*)  $\delta$  7.66 – 7.57 (m, 2H), 7.06 – 6.97 (m, 2H), 5.76 (s, 1H), 5.54 (s, 1H), 2.40 (t,  $J = 7.1$  Hz, 2H), 1.64 – 1.54 (m, 2H), 1.48 – 1.41 (m, 2H), 1.35 – 1.29 (m, 4H), 0.91 – 0.88 (m, 3H).  $^{13}\text{C}$  NMR (150 MHz, Chloroform-*d*)  $\delta$  162.81 (d,  $J = 247.5$  Hz), 134.01 (d,  $J = 3.0$  Hz), 130.01, 127.86 (d,  $J = 8.1$  Hz), 119.10, 115.16 (d,  $J = 21.5$  Hz), 92.42, 79.67, 31.42, 28.76, 28.73, 22.66, 19.47, 14.13. HRMS (EI+) calcd for  $[\text{C}_{16}\text{H}_{19}\text{F}]^+$  ( $[\text{M}]^+$ ): 230.1471, found: 230.1474.

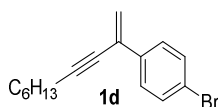

$^1\text{H}$  NMR (600 MHz, Chloroform-*d*)  $\delta$  7.55 – 7.50 (m, 2H), 7.48 – 7.43 (m, 2H), 5.82 (s, 1H), 5.59 (s, 1H), 2.41 (t,  $J = 7.2$  Hz, 2H), 1.64 – 1.56 (m, 2H), 1.48 – 1.41 (m, 2H), 1.36 – 1.30 (m, 4H), 0.91 (t,  $J = 6.9$  Hz, 3H).  $^{13}\text{C}$  NMR (150 MHz, Chloroform-*d*)  $\delta$  136.85, 131.44, 130.11, 127.80, 122.28, 119.80, 92.68, 79.39, 31.46, 28.77, 22.70, 19.50, 14.18. HRMS (EI+) calcd for  $[\text{C}_{16}\text{H}_{19}\text{Br}]^+$  ( $[\text{M}]^+$ ): 290.0670, found: 290.0675.

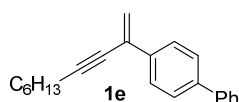

$^1\text{H}$  NMR (400 MHz, Chloroform-*d*)  $\delta$  7.76 – 7.69 (m, 2H), 7.63 – 7.54 (m, 4H), 7.46 – 7.39 (m, 2H), 7.37 – 7.30 (m, 1H), 5.88 (s, 1H), 5.60 (s, 1H), 2.42 (t,  $J = 7.1$  Hz, 2H), 1.67 – 1.57 (m, 2H), 1.52 – 1.42 (m, 2H), 1.37 – 1.29 (m, 4H), 0.95 – 0.86 (m, 3H).  $^{13}\text{C}$  NMR (100 MHz, Chloroform-*d*)

$\delta$  140.92, 140.68, 136.83, 130.59, 128.81, 127.41, 127.05, 126.99, 126.53, 119.25, 92.24, 79.75, 31.40, 28.76, 28.71, 22.63, 19.48, 14.11. The spectrum data matches previously reported values<sup>3</sup>.

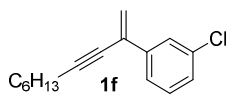

$^1H$  NMR (400 MHz, Chloroform-*d*)  $\delta$  7.63 (s, 1H), 7.55 – 7.48 (m, 1H), 7.27 – 7.23 (m, 2H), 5.83 (s, 1H), 5.60 (s, 1H), 2.40 (t,  $J = 7.1$  Hz, 2H), 1.63 – 1.56 (m, 2H), 1.48 – 1.41 (m, 2H), 1.35 – 1.30 (m, 4H), 0.90 (t,  $J = 6.8$  Hz, 3H).  $^{13}C$  NMR (100 MHz, Chloroform-*d*)  $\delta$  139.67, 134.31, 129.87, 129.47, 128.09, 126.37, 124.15, 120.31, 92.70, 79.19, 31.40, 28.70, 28.67, 22.63, 19.42, 14.10. HRMS (EI+) calcd for  $[C_{16}H_{19}Cl]^+$  ( $[M]^+$ ): 246.1175, found: 246.1185.

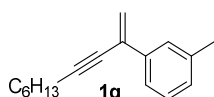

$^1H$  NMR (600 MHz, Chloroform-*d*)  $\delta$  7.57 – 7.39 (m, 2H), 7.26 – 7.21 (m, 1H), 7.14 – 7.09 (m, 1H), 5.83 (d,  $J = 1.3$  Hz, 1H), 5.57 (d,  $J = 1.2$  Hz, 1H), 2.42 (t,  $J = 7.1$  Hz, 2H), 2.38 (s, 3H), 1.65 – 1.59 (m, 2H), 1.51 – 1.45 (m, 2H), 1.36 – 1.30 (m, 4H), 0.92 (t,  $J = 7.0$  Hz, 3H).  $^{13}C$  NMR (150 MHz, Chloroform-*d*)  $\delta$  137.91, 137.89, 131.15, 128.96, 128.26, 126.91, 123.30, 119.32, 92.04, 79.98, 31.48, 28.81, 28.76, 22.70, 21.57, 19.53, 14.17. HRMS (EI+) calcd for  $[C_{17}H_{22}]^+$  ( $[M]^+$ ): 226.1722, found: 226.1719.

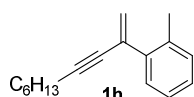

$^1H$  NMR (600 MHz, Chloroform-*d*)  $\delta$  7.29 – 7.23 (m, 1H), 7.23 – 7.16 (m, 3H), 5.69 (d,  $J = 1.9$  Hz, 1H), 5.39 (d,  $J = 2.0$  Hz, 1H), 2.45 (s, 3H), 2.34 (t,  $J = 7.1$  Hz, 2H), 1.58 – 1.53 (m, 2H), 1.44 – 1.38 (m, 2H), 1.33 – 1.28 (m, 4H), 0.90 (t,  $J = 6.9$  Hz, 3H).  $^{13}C$  NMR (150 MHz, Chloroform-*d*)  $\delta$  140.10, 135.52, 132.36, 130.39, 128.76, 127.75, 125.88, 123.91, 92.07, 80.71, 31.44, 28.74, 22.65, 20.28, 19.56, 14.13. HRMS (EI+) calcd for  $[C_{17}H_{22}]^+$  ( $[M]^+$ ): 226.1722, found: 226.1729.

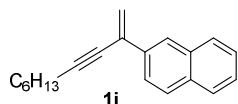

$^1H$  NMR (400 MHz, Chloroform-*d*)  $\delta$  8.14 (s, 1H), 7.90 – 7.72 (m, 4H), 7.46 (m, 2H), 5.98 (s, 1H), 5.67 (s, 1H), 2.47 (t,  $J = 7.0$  Hz, 2H), 1.72 – 1.59 (m, 2H), 1.55 – 1.47 (m, 2H), 1.40 – 1.31 (m, 4H), 0.91 (t,  $J = 7.0$  Hz, 3H).  $^{13}C$  NMR (100 MHz, Chloroform-*d*)  $\delta$  135.08, 133.28, 133.15, 130.91, 128.42, 127.82, 127.55, 126.22, 126.16, 125.91, 123.46, 119.69, 92.31, 79.78, 31.41, 28.76, 28.71, 22.63, 19.51, 14.10. The spectrum data matches previously reported values<sup>3</sup>.

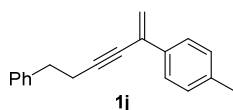

$^1H$  NMR (600 MHz, Chloroform-*d*)  $\delta$  7.53 – 7.43 (m, 2H), 7.36 – 7.32 (m, 2H), 7.30 – 7.24 (m, 3H), 7.16 – 7.11 (m, 2H), 5.82 (d,  $J = 1.2$  Hz, 1H), 5.54 (d,  $J = 1.2$  Hz, 1H), 2.95 (t,  $J = 7.5$  Hz, 2H), 2.74 (t,  $J = 7.5$  Hz, 2H), 2.37 (s, 3H).  $^{13}C$  NMR (150 MHz, Chloroform-*d*)  $\delta$  140.76, 138.09, 134.89, 130.73, 129.05, 128.69, 128.53, 126.44, 126.07, 118.79, 90.88, 80.77, 35.18, 21.69, 21.27. HRMS (EI+) calcd for  $[C_{19}H_{18}]^+$  ( $[M]^+$ ): 246.1409, found: 246.1413.

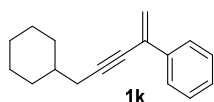

$^1\text{H}$  NMR (400 MHz, Chloroform-*d*)  $\delta$  7.71 – 7.59 (m, 2H), 7.36 – 7.26 (m, 3H), 5.83 (d,  $J = 1.2$  Hz, 1H), 5.58 (d,  $J = 1.1$  Hz, 1H), 2.31 (d,  $J = 6.6$  Hz, 2H), 1.90 – 1.84 (m, 2H), 1.77 – 1.64 (m, 4H), 1.31 – 1.10 (m, 5H).  $^{13}\text{C}$  NMR (100 MHz, Chloroform-*d*)  $\delta$  137.87, 131.04, 128.26, 128.08, 126.08, 119.32, 90.97, 80.61, 37.52, 32.84, 27.26, 26.31, 26.18. HRMS (EI+) calcd for  $[\text{C}_{17}\text{H}_{20}]^+$  ( $[\text{M}]^+$ ): 224.1565, found: 224.1574.

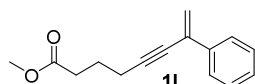

$^1\text{H}$  NMR (600 MHz, Chloroform-*d*)  $\delta$  7.66 – 7.61 (m, 2H), 7.35 – 7.32 (m, 2H), 7.30 – 7.27 (m, 1H), 5.85 (d,  $J = 1.1$  Hz, 1H), 5.59 (d,  $J = 1.1$  Hz, 1H), 3.67 (s, 3H), 2.51 – 2.47 (m, 4H), 1.95 – 1.90 (m, 2H).  $^{13}\text{C}$  NMR (150 MHz, Chloroform-*d*)  $\delta$  173.69, 137.68, 130.83, 128.41, 128.28, 126.11, 119.93, 90.51, 80.71, 51.70, 33.01, 24.00, 18.96. HRMS (ESI) calcd for  $[\text{C}_{15}\text{H}_{26}\text{O}_2\text{Na}]^+$  ( $[\text{M}+\text{Na}]^+$ ): 251.1043, found: 251.1042.

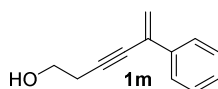

$^1\text{H}$  NMR (400 MHz, Chloroform-*d*)  $\delta$  7.70 – 7.55 (m, 2H), 7.36 – 7.24 (m, 3H), 5.85 (s, 1H), 5.61 (s, 1H), 3.82 – 3.69 (m, 2H), 2.83 – 2.73 (m, 1H), 2.63 (t,  $J = 6.5$  Hz, 2H).  $^{13}\text{C}$  NMR (100 MHz, Chloroform-*d*)  $\delta$  137.49, 130.60, 128.43, 128.34, 126.08, 120.34, 88.30, 81.46, 61.13, 23.75. HRMS (EI+) calcd for  $[\text{C}_{12}\text{H}_{12}\text{O}]^+$  ( $[\text{M}]^+$ ): 172.0888, found: 172.0894.

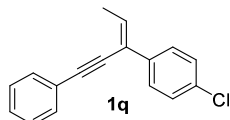

$^1\text{H}$  NMR (400 MHz, Chloroform-*d*)  $\delta$  7.60 – 7.45 (m, 4H), 7.38 – 7.23 (m, 5H), 6.46 (q,  $J = 6.9$  Hz, 1H), 2.12 (d,  $J = 7.2$  Hz, 3H).  $^{13}\text{C}$  NMR (100 MHz, Chloroform-*d*)  $\delta$  136.81, 133.70, 133.23, 131.60, 128.55, 128.48, 128.44, 127.24, 123.51, 123.37, 96.02, 86.26, 17.19. HRMS (EI+) calcd for  $[\text{C}_{17}\text{H}_{13}\text{Cl}]^+$  ( $[\text{M}]^+$ ): 252.0706, found: 252.0698.

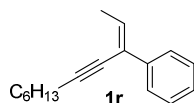

$^1\text{H}$  NMR (400 MHz, Chloroform-*d*)  $\delta$  7.66 – 7.49 (m, 2H), 7.35 – 7.27 (m, 2H), 7.26 – 7.19 (m, 1H), 6.39 (q,  $J = 6.9$  Hz, 1H), 2.46 (t,  $J = 7.0$  Hz, 2H), 2.04 (d,  $J = 6.9$  Hz, 3H), 1.66 – 1.57 (m, 2H), 1.53 – 1.46 (m, 2H), 1.35 – 1.29 (m, 4H), 0.93 – 0.88 (m, 3H).  $^{13}\text{C}$  NMR (100 MHz, Chloroform-*d*)  $\delta$  138.94, 131.52, 128.21, 127.14, 125.87, 124.77, 96.85, 77.71, 31.38, 28.95, 28.64, 22.61, 19.64, 16.78, 14.07. The spectrum data matches previously reported values<sup>3</sup>.

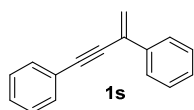

$^1\text{H}$  NMR (400 MHz, Chloroform-*d*)  $\delta$  7.76 – 7.69 (m, 2H), 7.58 – 7.50 (m, 2H), 7.41 – 7.31 (m, 6H), 5.98 (s, 1H), 5.76 (s, 1H).  $^{13}\text{C}$  NMR (100 MHz, Chloroform-*d*)  $\delta$  137.28, 131.68, 130.62,

128.42, 128.36, 126.11, 123.11, 120.68, 90.78, 88.56. The spectrum data matches previously reported values<sup>3</sup>.

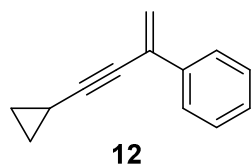

<sup>1</sup>H NMR (400 MHz, Chloroform-*d*)  $\delta$  7.70 – 7.55 (m, 2H), 7.39 – 7.25 (m, 3H), 5.81 (d,  $J = 1.1$  Hz, 1H), 5.55 (d,  $J = 1.2$  Hz, 1H), 1.53 – 1.33 (m, 1H), 0.87 – 0.77 (m, 4H). <sup>13</sup>C NMR (100 MHz, Chloroform-*d*)  $\delta$  137.89, 130.96, 128.36, 128.21, 126.14, 119.55, 95.20, 75.10, 8.77, 0.30. The spectrum data matches previously reported values<sup>4</sup>.

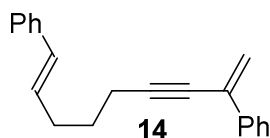

<sup>1</sup>H NMR (400 MHz, Chloroform-*d*)  $\delta$  7.86 – 7.47 (m, 2H), 7.39 – 7.23 (m, 7H), 7.22 – 7.15 (m, 1H), 6.43 (d,  $J = 16.0$  Hz, 1H), 6.22 (dt,  $J = 15.9, 7.0$  Hz, 1H), 5.85 (s, 1H), 5.60 (s, 1H), 2.46 (t,  $J = 7.1$  Hz, 2H), 2.41 – 2.33 (m, 2H), 1.84 – 1.73 (m, 2H). <sup>13</sup>C NMR (100 MHz, Chloroform-*d*)  $\delta$  137.79, 137.70, 130.94, 130.80, 129.75, 128.58, 128.37, 128.22, 127.04, 126.13, 126.05, 119.64, 91.58, 80.26, 32.23, 28.41, 18.96. MS (EI+) calcd for [C<sub>21</sub>H<sub>20</sub>Cl]<sup>+</sup> ([M]<sup>+</sup>): 272.1, found: 272.3.

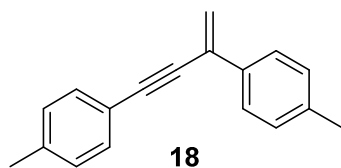

<sup>1</sup>H NMR (600 MHz, Chloroform-*d*)  $\delta$  7.64 – 7.61 (m, 2H), 7.45 – 7.41 (m, 2H), 7.19 (d,  $J = 7.9$  Hz, 2H), 7.15 (d,  $J = 7.8$  Hz, 2H), 5.92 (d,  $J = 1.1$  Hz, 1H), 5.69 (d,  $J = 1.3$  Hz, 1H), 2.37 (s, 3H), 2.36 (s, 3H). <sup>13</sup>C NMR (150 MHz, Chloroform-*d*)  $\delta$  138.62, 138.32, 134.70, 131.68, 130.62, 129.22, 129.18, 126.12, 120.19, 119.57, 90.89, 88.20, 21.63, 21.30. The spectrum data matches previously reported values<sup>5</sup>.



# Synthesis of alkyl diacyl peroxides

*Alkyl diacyl peroxides have potentials to explode. Any alkyl diacyl peroxides involved reaction (as product or substrate) should be carried out with precautions!*

Lauroyl peroxide (LPO) **2a** was purchased from Admas. Other peroxides were prepared according to our previous work<sup>6</sup>.

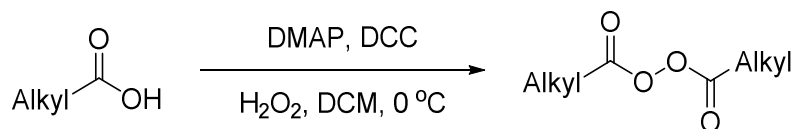

A solution of DMAP (0.6 mmol), 30% hydrogen peroxide (8 mmol), and acid (6 mmol) in DCM (8 mL) was cooled to -15 °C for about 10 min, then DCC (6.72 mmol) was added. After stirring at -15~-10 °C for 1.5 h, DCM (15 mL) was added into the reaction solution and the solution was filtered through a short pad of silica gel. Then washed the pad of silica gel by additional 40 mL of DCM. The combined solution was concentrated on a rotary evaporator under vacuum at 10~15 °C and then purified by flash column chromatography on silica gel to give the alkyl diacyl peroxide.

# Characterization data for diacyl peroxides

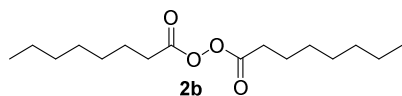

$^1\text{H}$  NMR (400 MHz, Chloroform-*d*)  $\delta$  2.42 (t,  $J = 7.5$  Hz, 4H), 1.76 – 1.66 (m, 4H), 1.41 – 1.24 (m, 16H), 0.93 – 0.83 (m, 6H).  $^{13}\text{C}$  NMR (100 MHz, Chloroform-*d*)  $\delta$  169.25, 31.54, 30.00, 28.87, 28.75, 24.81, 22.55, 14.00. The spectrum data matches previously reported values<sup>7</sup>.

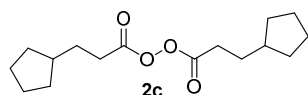

$^1\text{H}$  NMR (400 MHz, Chloroform-*d*)  $\delta$  2.49 – 2.40 (m, 4H), 1.87 – 1.69 (m, 10H), 1.65 – 1.48 (m, 8H), 1.19 – 1.02 (m, 4H).  $^{13}\text{C}$  NMR (100 MHz, Chloroform-*d*)  $\delta$  169.40, 39.47, 32.29, 30.94, 29.36, 25.10. The spectrum data matches previously reported values<sup>6</sup>.

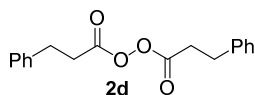

$^1\text{H}$  NMR (400 MHz, Chloroform-*d*)  $\delta$  7.36 – 7.26 (m, 4H), 7.26 – 7.17 (m, 6H), 3.02 (t,  $J = 7.8$  Hz, 4H), 2.80 – 2.68 (m, 4H).  $^{13}\text{C}$  NMR (100 MHz, Chloroform-*d*)  $\delta$  168.42, 139.33, 128.71, 128.29, 126.71, 31.70, 30.70. The spectrum data matches previously reported values<sup>6</sup>.

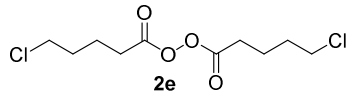

$^1\text{H}$  NMR (400 MHz, Chloroform-*d*)  $\delta$  3.67 – 3.47 (m, 4H), 2.57 – 2.45 (m, 4H), 1.95 – 1.81 (m, 8H).  $^{13}\text{C}$  NMR (100 MHz, Chloroform-*d*)  $\delta$  168.77, 44.23, 31.42, 29.20, 22.15. The spectrum data matches previously reported values<sup>6</sup>.

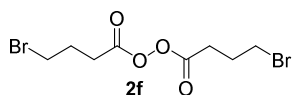

$^1\text{H}$  NMR (400 MHz, Chloroform-*d*)  $\delta$  3.68 – 3.30 (m, 4H), 2.73 – 2.50 (m, 4H), 2.36 – 2.11 (m, 4H).  $^{13}\text{C}$  NMR (100 MHz, Chloroform-*d*)  $\delta$  168.19, 31.80, 28.39, 27.60. The spectrum data matches previously reported values<sup>6</sup>.

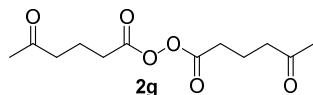

$^1\text{H}$  NMR (400 MHz, Chloroform-*d*)  $\delta$  2.60 (t,  $J = 7.0$  Hz, 4H), 2.49 (t,  $J = 7.0$  Hz, 4H), 2.16 (s, 6H), 1.97 (p,  $J = 6.9$  Hz, 4H).  $^{13}\text{C}$  NMR (100 MHz, Chloroform-*d*)  $\delta$  207.44, 168.76, 41.60, 29.95, 28.88, 18.64. The spectrum data matches previously reported values<sup>6</sup>.

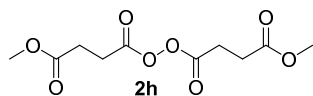

$^1\text{H}$  NMR (400 MHz, Chloroform-*d*)  $\delta$  3.72 (s, 6H), 2.81 – 2.69 (m, 8H).  $^{13}\text{C}$  NMR (100 MHz, Chloroform-*d*)  $\delta$  171.80, 168.21, 52.25, 28.72, 25.34. The spectrum data matches previously reported values<sup>6</sup>.

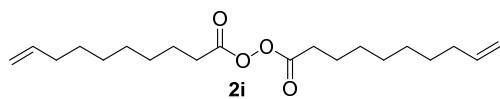

$^1\text{H}$  NMR (400 MHz, Chloroform-*d*)  $\delta$  5.89 – 5.72 (m, 2H), 5.06 – 4.88 (m, 4H), 2.42 (t,  $J = 7.4$  Hz, 4H), 2.07 – 2.00 (m, 4H), 1.75 – 1.67 (m, 4H), 1.40 – 1.29 (m, 16H).  $^{13}\text{C}$  NMR (100 MHz, Chloroform-*d*)  $\delta$  169.30, 139.09, 114.33, 33.81, 30.07, 29.02, 28.94, 28.90, 28.88, 24.88. The spectrum data matches previously reported values<sup>6</sup>.

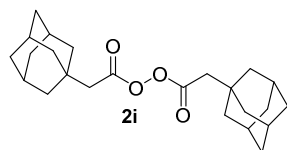

$^1\text{H}$  NMR (400 MHz, Chloroform-*d*)  $\delta$  2.19 (s, 4H), 2.00 (s, 6H), 1.74 – 1.63 (m, 24H).  $^{13}\text{C}$  NMR (100 MHz, Chloroform-*d*)  $\delta$  166.72, 44.46, 42.11, 36.53, 32.99, 28.55. The spectrum data matches previously reported values<sup>7</sup>.

# Optimization of the reaction conditions

**General procedure for Table S1:** In a flame-dried Schlenk tube, Cat. (0.01 mmol, 5 mol%) and Py-Box ligand ( $\pm$ )-**L16** (0.014 mmol, 7 mol%) were dissolved in THF (1 mL) under a nitrogen atmosphere, and the mixture was stirred at room temperature for 30 minutes. Then 1,3-enyne **1a** (0.2 mmol, 1.0 equiv), peroxide **2a** (0.3 mmol, 1.5 equiv), PhB(OH)<sub>2</sub> (0.6 mmol, 3 equiv) and base (0.6 mmol, 3 equiv) were sequentially added. The reaction mixture was stirred at rt for 5 h. Upon completion of the reaction as monitored by TLC, the solvent was concentrated under vacuum. The crude residue was purified by flash column chromatography on silica gel to give the product.

**Table S1.** Optimized reaction conditions<sup>a</sup>

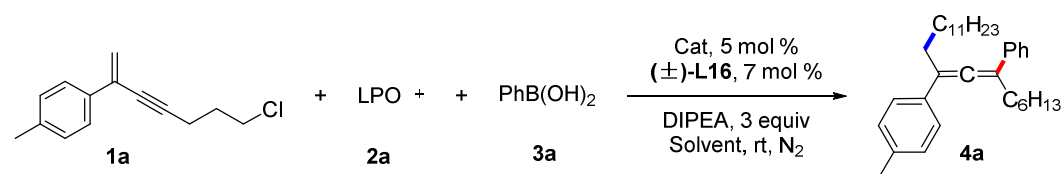

| entry           | cat.                                                | solvent     | base                           | yield (%) |
|-----------------|-----------------------------------------------------|-------------|--------------------------------|-----------|
| 1               | CuTc                                                | THF         | DIPEA                          | 69%       |
| 2               | Cu(OAc) <sub>2</sub>                                | THF         | DIPEA                          | 67%       |
| 3               | Cu(OTf) <sub>2</sub>                                | THF         | DIPEA                          | 51%       |
| 4               | Cu(TFA) <sub>2</sub>                                | THF         | DIPEA                          | 66%       |
| 5               | Pd(OAc) <sub>2</sub>                                | THF         | DIPEA                          | trace     |
| 6               | NiCl <sub>2</sub>                                   | THF         | DIPEA                          | trace     |
| 7               | CoCl <sub>2</sub>                                   | THF         | DIPEA                          | trace     |
| 8               | Cu(CH <sub>3</sub> CN) <sub>4</sub> BF <sub>4</sub> | THF         | DIPEA                          | 70%       |
| 9               | Cu(CH <sub>3</sub> CN) <sub>4</sub> BF <sub>4</sub> | DCM         | DIPEA                          | 50%       |
| 10              | Cu(CH <sub>3</sub> CN) <sub>4</sub> BF <sub>4</sub> | TBME        | DIPEA                          | 21%       |
| 11              | Cu(CH <sub>3</sub> CN) <sub>4</sub> BF <sub>4</sub> | 1,4-dioxane | DIPEA                          | 18%       |
| 12              | Cu(CH <sub>3</sub> CN) <sub>4</sub> BF <sub>4</sub> | DMF         | DIPEA                          | Trace     |
| 13              | Cu(CH <sub>3</sub> CN) <sub>4</sub> BF <sub>4</sub> | DME         | DIPEA                          | 47%       |
| 14              | Cu(CH <sub>3</sub> CN) <sub>4</sub> BF <sub>4</sub> | THF         | KF                             | 18%       |
| 15              | Cu(CH <sub>3</sub> CN) <sub>4</sub> BF <sub>4</sub> | THF         | DMAP                           | trace     |
| 16              | Cu(CH <sub>3</sub> CN) <sub>4</sub> BF <sub>4</sub> | THF         | K <sub>2</sub> CO <sub>3</sub> | trace     |
| 17              | Cu(CH <sub>3</sub> CN) <sub>4</sub> BF <sub>4</sub> | THF         | Et <sub>3</sub> N              | 65%       |
| 18 <sup>b</sup> | Cu(CH <sub>3</sub> CN) <sub>4</sub> BF <sub>4</sub> | THF         | DIEPA                          | 53%       |
| 19 <sup>c</sup> | Cu(CH <sub>3</sub> CN) <sub>4</sub> BF <sub>4</sub> | THF         | DIEPA                          | trace     |

<sup>a</sup> Reaction conditions: **1a** (0.2 mmol, 1 equiv), **2a** (0.3 mmol, 1.5 equiv), **3a** (0.6 mmol, 3 equiv), Cat. (5 mol%), (**±**)-**L16** (7 mol%), base (0.6 mmol, 3 equiv), solvent (1 mL), rt. <sup>b</sup> 2,4,6-Triphenyloroxin instead of PhB(OH)<sub>2</sub>. <sup>c</sup> PhBpin instead of PhB(OH)<sub>2</sub>. <sup>d</sup> Isolated yield.

## General procedure for 1,4-alkylarylation of 1,3-enynes

**General procedure A:** In a flame-dried Schlenk tube, Cu(CH<sub>3</sub>CN)<sub>4</sub>BF<sub>4</sub> (0.01 mmol, 5 mol%) and Py-Box ligand (**±**)-**L16** (0.014 mmol, 7 mol%) were dissolved in THF (1 mL) under a nitrogen atmosphere, and the mixture was stirred at room temperature for 30 minutes. Then 1,3-enyne (0.2 mmol, 1.0 equiv), peroxide (0.3 mmol, 1.5 equiv), PhB(OH)<sub>2</sub> (0.6 mmol, 3 equiv) and DIPEA (0.6 mmol, 3 equiv) were sequentially added. The reaction mixture was stirred at rt for 5 h. Upon completion of the reaction as monitored by TLC, the solvent was concentrated under vacuum. The crude residue was purified by flash column chromatography on silica gel to give the product.

**General procedure B:** In a flame-dried Schlenk tube, Cu(CH<sub>3</sub>CN)<sub>4</sub>BF<sub>4</sub> (0.01 mmol, 5 mol%) and Py-Box ligand (**±**)-**L16** (0.014 mmol, 7 mol%) were dissolved in THF (1 mL) under a nitrogen atmosphere, and the mixture was stirred at room temperature for 30 minutes. Then 1,3-enyne (0.2 mmol, 1.0 equiv), peroxide (0.3 mmol, 1.5 equiv), PhB(OH)<sub>2</sub> (0.6 mmol, 3 equiv) and DMF (1 mL) were sequentially added. The reaction mixture was stirred at rt for 5 h. Upon completion of the reaction as monitored by TLC, the solvent was concentrated under vacuum. The crude residue was purified by flash column chromatography on silica gel to give the product.

## Characterization data for products

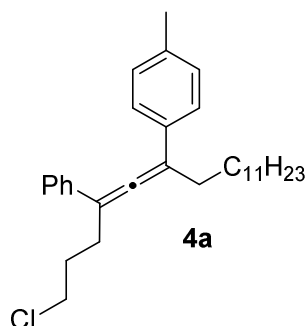

Following the general procedure **A**, **4a** was obtained as a liquid (63 mg, 70% yield). <sup>1</sup>H NMR (600 MHz, Chloroform-*d*) δ 7.47 (d, *J* = 8.2 Hz, 2H), 7.38 – 7.30 (m, 4H), 7.28 – 7.21 (m, 1H), 7.15 (d, *J* = 8.0 Hz, 2H), 3.63 (t, *J* = 6.4 Hz, 2H), 2.74 (t, *J* = 7.5 Hz, 2H), 2.56 (t, *J* = 7.6 Hz, 2H), 2.36 (s, 3H), 2.15 – 2.01 (m, 2H), 1.66 – 1.54 (m, 2H), 1.40 (p, *J* = 7.6, 7.1 Hz, 2H), 1.37 – 1.22 (m, 16H), 0.91 (t, *J* = 6.9 Hz, 3H). <sup>13</sup>C NMR (150 MHz, Chloroform-*d*) δ 204.80, 136.79, 133.71, 129.38, 128.63, 126.95, 125.95, 110.04, 107.78, 45.06, 32.07, 31.10, 30.58, 29.88, 29.82, 29.78, 29.68, 29.51, 28.30, 27.65, 22.85, 21.22, 14.28. HRMS (DART) calcd for [C<sub>31</sub>H<sub>44</sub>Cl]<sup>+</sup> ([M+H]<sup>+</sup>): 451.3126, found: 451.3123.

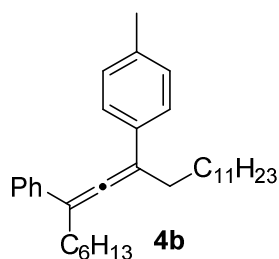

Following the general procedure **A**, **4b** was obtained as a liquid (58 mg, 63% yield). <sup>1</sup>H NMR (600 MHz, Chloroform-*d*) δ 7.46 (d, *J* = 8.1 Hz, 2H), 7.36 (d, *J* = 8.1 Hz, 2H), 7.32 (t, *J* = 7.6 Hz, 2H), 7.21 (d, *J* = 7.8 Hz, 1H), 7.14 (d, *J* = 8.3 Hz, 2H), 2.56 (q, *J* = 7.2 Hz, 4H), 2.35 (s, 3H), 1.67 – 1.57 (m, 4H), 1.45 – 1.39 (m, 4H), 1.32 – 1.25 (m, 20H), 0.92 – 0.87 (m, 6H). <sup>13</sup>C NMR (150 MHz, Chloroform-*d*) δ 205.15, 137.36, 136.42, 134.18, 129.25, 128.49, 126.62, 126.03, 125.95, 109.00, 32.07, 31.93, 30.53, 29.88, 29.82, 29.79, 29.71, 29.58, 29.51, 28.28, 28.26, 22.84, 21.20, 14.27, 14.22. HRMS (DART) calcd for [C<sub>34</sub>H<sub>51</sub>]<sup>+</sup> ([M+H]<sup>+</sup>): 459.3985, found: 459.3981.

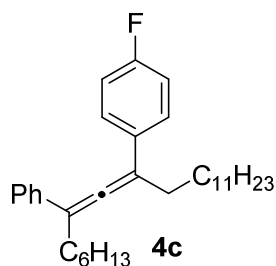

Following the general procedure A, **4c** was obtained as a liquid (43 mg, 46% yield).  $^1\text{H}$  NMR (400 MHz, Chloroform-*d*)  $\delta$  7.42 (d,  $J = 7.7$  Hz, 2H), 7.40 – 7.34 (m, 2H), 7.31 (t,  $J = 7.6$  Hz, 2H), 7.20 (t,  $J = 7.3$  Hz, 1H), 6.99 (t,  $J = 8.7$  Hz, 2H), 2.72 – 2.38 (m, 4H), 1.63 – 1.51 (m, 4H), 1.42 – 1.34 (m, 4H), 1.30 – 1.21 (m, 20H), 0.90 – 0.83 (m, 6H).  $^{13}\text{C}$  NMR (100 MHz, Chloroform-*d*)  $\delta$  204.98 (d,  $J = 1.9$  Hz), 161.78 (d,  $J = 245.7$  Hz), 133.04 (d,  $J = 3.2$  Hz), 128.45, 127.38 (d,  $J = 7.8$  Hz), 126.71, 125.91, 115.23 (d,  $J = 21.3$  Hz), 109.23, 108.26, 31.96, 31.80, 30.59, 30.40, 29.73, 29.71, 29.70, 29.67, 29.58, 29.44, 29.40, 28.13, 28.08, 22.73, 14.16, 14.11. HRMS (DART) calcd for  $[\text{C}_{33}\text{H}_{48}\text{F}]^+$  ( $[\text{M}+\text{H}]^+$ ): 463.3735, found: 463.3731.

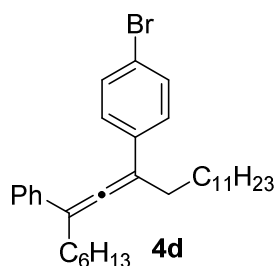

Following the general procedure A, **4d** was obtained as a liquid (68 mg, 65% yield).  $^1\text{H}$  NMR (600 MHz, Chloroform-*d*)  $\delta$  7.45 – 7.41 (m, 4H), 7.34 – 7.29 (m, 4H), 7.24 – 7.20 (m, 1H), 2.56 (t,  $J = 7.6$  Hz, 2H), 2.52 (t,  $J = 7.6$  Hz, 2H), 1.64 – 1.53 (m, 4H), 1.43 – 1.36 (m, 4H), 1.32 – 1.24 (m, 20H), 0.92 – 0.87 (m, 6H).  $^{13}\text{C}$  NMR (150 MHz, Chloroform-*d*)  $\delta$  205.39, 136.80, 136.23, 131.54, 128.57, 127.62, 126.90, 126.02, 120.46, 109.63, 108.45, 32.03, 31.87, 30.43, 30.38, 29.78, 29.75, 29.64, 29.51, 29.48, 28.19, 28.14, 22.80, 14.23, 14.18. HRMS (DART) calcd for  $[\text{C}_{33}\text{H}_{48}\text{Br}]^+$  ( $[\text{M}+\text{H}]^+$ ): 523.2934, found: 523.2931.

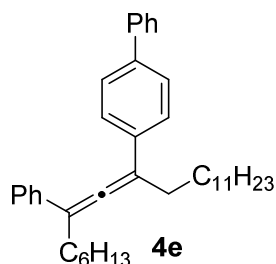

Following the general procedure A, **4e** was obtained as a liquid (76 mg, 73% yield).  $^1\text{H}$  NMR (600 MHz, Chloroform-*d*)  $\delta$  7.64 (d,  $J = 7.6$  Hz, 2H), 7.60 (d,  $J = 8.1$  Hz, 2H), 7.56 (d,  $J = 8.5$  Hz, 2H), 7.51 (d,  $J = 7.8$  Hz, 2H), 7.47 (t,  $J = 7.6$  Hz, 2H), 7.37 (t,  $J = 7.6$  Hz, 3H), 7.26 (t,  $J = 7.5$  Hz, 1H), 2.74 – 2.37 (m, 4H), 1.72 – 1.62 (m, 4H), 1.50 – 1.42 (m, 4H), 1.36 – 1.28 (m, 20H), 0.95 – 0.90 (m, 6H).  $^{13}\text{C}$  NMR (150 MHz, Chloroform-*d*)  $\delta$  205.71, 141.03, 139.56, 137.16, 136.22, 128.91, 128.58, 127.28, 127.15, 127.08, 126.81, 126.47, 126.10, 109.36, 108.95, 32.10, 31.96, 30.57,

30.53, 29.93, 29.87, 29.83, 29.75, 29.63, 29.55, 28.34, 28.30, 22.88, 14.31, 14.26. HRMS (DART) calcd for  $[C_{39}H_{53}]^+$  ( $[M+H]^+$ ): 521.4142, found: 521.4136.

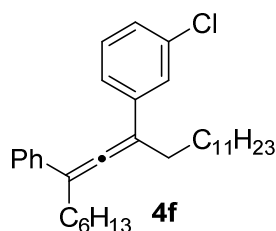

Following the general procedure A, **4f** was obtained as a liquid (53 mg, 55% yield).  $^1H$  NMR (600 MHz, Chloroform-*d*)  $\delta$  7.43 – 7.39 (m, 2H), 7.39 – 7.36 (m, 1H), 7.34 – 7.28 (m, 3H), 7.24 – 7.18 (m, 2H), 7.18 – 7.14 (m, 1H), 2.54 (t,  $J = 8.4$  Hz, 2H), 2.50 (t,  $J = 7.8$  Hz, 2H), 1.60 – 1.52 (m, 4H), 1.42 – 1.36 (m, 4H), 1.27 – 1.22 (m, 20H), 0.88 – 0.85 (m, 6H).  $^{13}C$  NMR (150 MHz, Chloroform-*d*)  $\delta$  205.51, 139.37, 136.72, 134.51, 129.63, 128.57, 126.93, 126.66, 126.06, 125.95, 124.19, 109.73, 108.35, 32.03, 31.87, 30.44, 30.38, 29.79, 29.76, 29.74, 29.63, 29.51, 29.47, 28.16, 28.10, 22.80, 14.24, 14.18. HRMS (DART) calcd for  $[C_{33}H_{48}Cl]^+$  ( $[M+H]^+$ ): 479.3439, found: 479.3435.

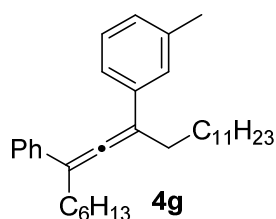

Following the general procedure A, **4g** was obtained as a liquid (65 mg, 71% yield).  $^1H$  NMR (400 MHz, Chloroform-*d*)  $\delta$  7.46 – 7.41 (m, 2H), 7.30 (t,  $J = 7.6$  Hz, 2H), 7.26 – 7.16 (m, 4H), 7.01 (d,  $J = 7.3$  Hz, 1H), 2.65 – 2.42 (m, 4H), 2.33 (s, 3H), 1.66 – 1.53 (m, 4H), 1.45 – 1.34 (m, 4H), 1.30 – 1.19 (m, 20H), 0.91 – 0.83 (m, 6H).  $^{13}C$  NMR (100 MHz,  $CDCl_3$ )  $\delta$  205.30, 137.96, 137.20, 137.05, 128.42, 128.34, 127.47, 126.63, 126.58, 125.97, 123.11, 109.09, 108.89, 32.00, 31.86, 30.48, 30.42, 29.80, 29.76, 29.72, 29.63, 29.51, 29.44, 28.19, 28.17, 22.78, 21.65, 14.21, 14.16. HRMS (DART) calcd for  $[C_{34}H_{51}]^+$  ( $[M+H]^+$ ): 459.3985, found: 459.3981.

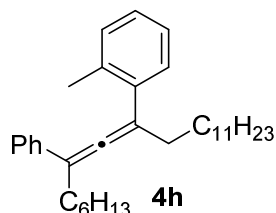

Following the general procedure A, **4h** was obtained as a liquid (50 mg, 54% yield).  $^1H$  NMR (400 MHz, Chloroform-*d*)  $\delta$  7.47 – 7.39 (m, 2H), 7.31 (t,  $J = 7.6$  Hz, 2H), 7.27 – 7.24 (m, 1H), 7.21 – 7.11 (m, 4H), 2.50 – 2.38 (m, 4H), 2.33 (s, 3H), 1.61 – 1.47 (m, 4H), 1.42 – 1.33 (m, 4H), 1.31 – 1.23 (m, 20H), 0.91 – 0.86 (m, 6H).  $^{13}C$  NMR (100 MHz,  $CDCl_3$ )  $\delta$  202.77, 138.50, 137.67,



135.78, 130.39, 128.35, 128.25, 126.73, 126.34, 126.15, 125.68, 108.21, 106.00, 34.50, 31.97, 31.88, 30.55, 29.73, 29.69, 29.67, 29.59, 29.41, 29.39, 28.30, 28.15, 22.75, 20.71, 14.18, 14.16. HRMS (DART) calcd for  $[C_{34}H_{51}]^+$  ( $[M+H]^+$ ): 459.3985, found: 459.3982.

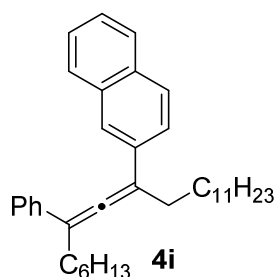

Following the general procedure A, **4i** was obtained as a liquid (53 mg, 54% yield).  $^1H$  NMR (400 MHz, Chloroform-*d*)  $\delta$  7.83 – 7.76 (m, 3H), 7.71 (d,  $J = 8.7$  Hz, 1H), 7.59 (dd,  $J = 8.6, 1.8$  Hz, 1H), 7.48 – 7.39 (m, 4H), 7.32 (t,  $J = 7.6$  Hz, 2H), 7.21 (t,  $J = 7.3$  Hz, 1H), 2.67 (t,  $J = 7.6$  Hz, 2H), 2.58 (t,  $J = 7.6$  Hz, 2H), 1.71 – 1.57 (m, 4H), 1.46 – 1.38 (m, 4H), 1.32 – 1.23 (m, 20H), 0.89 – 0.82 (m, 6H).  $^{13}C$  NMR (100 MHz,  $CDCl_3$ )  $\delta$  206.04, 137.05, 134.51, 133.73, 132.46, 128.46, 128.01, 127.78, 127.56, 126.69, 126.05, 125.99, 125.55, 125.43, 123.39, 109.38, 31.96, 31.81, 30.45, 30.35, 29.82, 29.73, 29.69, 29.62, 29.48, 29.41, 28.17, 22.74, 22.72, 14.17, 14.11. HRMS (DART) calcd for  $[C_{37}H_{51}]^+$  ( $[M+H]^+$ ): 495.3985, found: 495.3980.

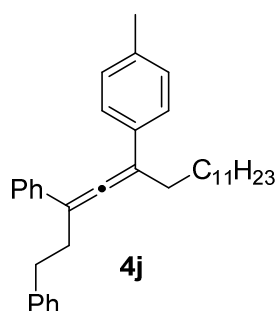

Following the general procedure A, **4j** was obtained as a liquid (43 mg, 45% yield).  $^1H$  NMR (600 MHz, Chloroform-*d*)  $\delta$  7.49 – 7.44 (m, 2H), 7.35 – 7.31 (m, 2H), 7.31 – 7.27 (m, 4H), 7.24 – 7.19 (m, 4H), 7.13 (d,  $J = 8.4$  Hz, 2H), 2.96 – 2.86 (m, 4H), 2.56 – 2.45 (m, 2H), 2.35 (s, 3H), 1.55 – 1.50 (m, 2H), 1.41 – 1.24 (m, 18H), 0.92 – 0.89 (m, 3H).  $^{13}C$  NMR (150 MHz, Chloroform-*d*)  $\delta$  205.11, 142.19, 137.05, 136.56, 133.93, 129.28, 128.58, 128.46, 126.79, 126.01, 125.98, 109.68, 108.41, 34.42, 32.33, 32.05, 30.54, 29.87, 29.82, 29.77, 29.68, 29.50, 28.22, 22.83, 21.21, 14.27. HRMS (DART) calcd for  $[C_{36}H_{47}]^+$  ( $[M+H]^+$ ): 479.3672, found: 479.3669.

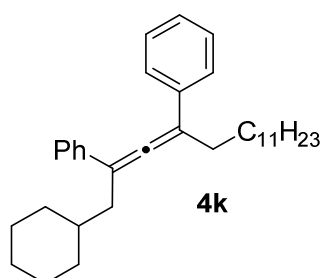

Following the general procedure A, **4k** was obtained as a liquid (61 mg, 67% yield).  $^1H$  NMR (400 MHz, Chloroform-*d*)  $\delta$  7.46 – 7.40 (m, 4H), 7.30 (t,  $J = 7.6$  Hz, 4H), 7.22 – 7.15 (m, 2H),

2.54 (t,  $J = 7.6$  Hz, 2H), 2.44 (d,  $J = 6.9$  Hz, 2H), 1.90 – 1.74 (m, 3H), 1.71 – 1.56 (m, 6H), 1.31 – 1.19 (m, 22H), 0.89 (t,  $J = 6.4$  Hz, 3H).  $^{13}\text{C}$  NMR (100 MHz, Chloroform-*d*)  $\delta$  205.96, 137.22, 137.10, 128.41, 126.58, 126.17, 126.07, 107.97, 107.18, 38.54, 36.41, 33.73, 33.68, 31.98, 30.63, 29.80, 29.74, 29.72, 29.70, 29.59, 29.42, 28.30, 26.57, 26.32, 26.27, 22.76, 14.20. HRMS (DART) calcd for  $[\text{C}_{34}\text{H}_{49}]^+$  ( $[\text{M}+\text{H}]^+$ ): 457.3829, found: 457.3826.

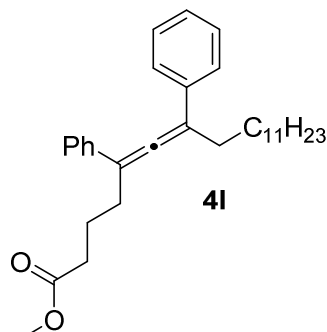

Following the general procedure A, **4l** was obtained as a liquid (64 mg, 69% yield).  $^1\text{H}$  NMR (600 MHz, Chloroform-*d*)  $\delta$  7.49 – 7.43 (m, 4H), 7.36 – 7.30 (m, 4H), 7.23 – 7.18 (m, 2H), 3.66 (s, 3H), 2.61 (t,  $J = 7.7$  Hz, 2H), 2.57 (t,  $J = 7.6$  Hz, 2H), 2.43 (t,  $J = 7.4$  Hz, 2H), 1.99 – 1.89 (m, 2H), 1.64 – 1.54 (m, 2H), 1.42 – 1.36 (m, 2H), 1.31 – 1.24 (m, 16H), 0.90 (t,  $J = 7.0$  Hz, 3H).  $^{13}\text{C}$  NMR (150 MHz, Chloroform-*d*)  $\delta$  205.21, 174.04, 136.90, 136.74, 128.60, 128.58, 126.90, 126.06, 125.98, 109.85, 108.37, 51.61, 33.91, 32.05, 30.53, 29.87, 29.80, 29.77, 29.67, 29.49, 28.28, 23.48, 22.83, 14.26. HRMS (DART) calcd for  $[\text{C}_{32}\text{H}_{45}\text{O}_2]^+$  ( $[\text{M}+\text{H}]^+$ ): 461.3414, found: 461.3411.

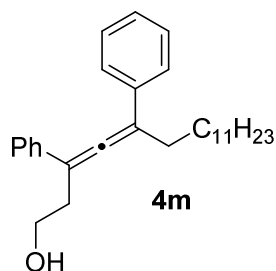

Following the general procedure A, **4m** was obtained as a liquid (26 mg, 32% yield).  $^1\text{H}$  NMR (400 MHz, Chloroform-*d*)  $\delta$  7.44 (d,  $J = 7.7$  Hz, 4H), 7.34 – 7.26 (m, 4H), 7.23 – 7.17 (m, 2H), 3.87 (t,  $J = 6.5$  Hz, 2H), 2.94 – 2.74 (m, 2H), 2.55 (t,  $J = 7.6$  Hz, 2H), 2.31 (t,  $J = 7.5$  Hz, 1H), 1.64 – 1.53 (m, 2H), 1.43 – 1.34 (m, 2H), 1.32 – 1.24 (m, 16H), 0.88 (t,  $J = 6.8$  Hz, 3H).  $^{13}\text{C}$  NMR (100 MHz, Chloroform-*d*)  $\delta$  204.82, 136.34, 136.28, 128.67, 128.60, 127.10, 127.06, 125.90, 125.84, 110.19, 105.80, 61.39, 33.47, 31.95, 30.41, 29.75, 29.69, 29.66, 29.63, 29.55, 29.39, 28.18, 22.73, 14.17. HRMS (DART) calcd for  $[\text{C}_{29}\text{H}_{41}\text{O}]^+$  ( $[\text{M}+\text{H}]^+$ ): 405.3152, found: 405.3149.

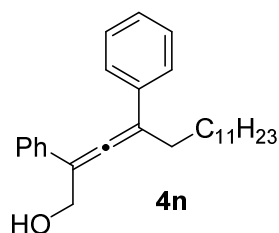

Following the general procedure A, **4n** was obtained as a liquid (33 mg, 42% yield).  $^1\text{H}$  NMR (600 MHz, Chloroform-*d*)  $\delta$  7.47 – 7.42 (m, 4H), 7.36 – 7.31 (m, 4H), 7.27 – 7.22 (m, 2H),

4.72 – 4.61 (m, 2H), 2.64 – 2.55 (m, 2H), 1.62 – 1.55 (m, 2H), 1.42 – 1.36 (m, 2H), 1.32 – 1.21 (m, 17H), 0.88 (t,  $J = 7.1$  Hz, 3H).  $^{13}\text{C}$  NMR (150 MHz, Chloroform-*d*)  $\delta$  203.57, 136.15, 134.54, 128.82, 128.70, 127.43, 127.40, 126.23, 126.12, 112.40, 110.07, 61.86, 32.03, 30.53, 29.77, 29.74, 29.72, 29.62, 29.47, 28.20, 22.81, 14.25. HRMS (EI+) calcd for  $[\text{C}_{28}\text{H}_{38}\text{O}]^+$  ( $[\text{M}]^+$ ): 390.2923, found: 390.2931.

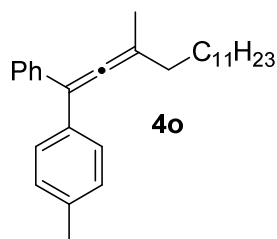

Following the general procedure A, **4o** was obtained as a liquid (38 mg, 49% yield).  $^1\text{H}$  NMR (400 MHz, Chloroform-*d*)  $\delta$  7.34 – 7.27 (m, 4H), 7.25 – 7.20 (m, 3H), 7.13 (d,  $J = 7.9$  Hz, 2H), 2.35 (s, 3H), 2.12 (t,  $J = 7.5$  Hz, 2H), 1.85 (s, 3H), 1.55 – 1.47 (m, 2H), 1.29 – 1.18 (m, 18H), 0.88 (t,  $J = 6.8$  Hz, 3H).  $^{13}\text{C}$  NMR (100 MHz, Chloroform-*d*)  $\delta$  203.08, 138.38, 136.39, 135.23, 128.96, 128.37, 128.33, 128.19, 126.62, 108.57, 102.87, 34.42, 31.98, 29.75, 29.72, 29.70, 29.68, 29.58, 29.48, 29.43, 27.66, 22.76, 21.19, 19.08, 14.19. HRMS (DART) calcd for  $[\text{C}_{29}\text{H}_{41}]^+$  ( $[\text{M}+\text{H}]^+$ ): 389.3203, found: 389.3200.

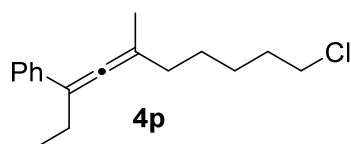

Following the general procedure A, **4p** was obtained as a liquid (13 mg, 27% yield).  $^1\text{H}$  NMR (400 MHz, Chloroform-*d*)  $\delta$  7.40 – 7.35 (m, 2H), 7.32 – 7.27 (m, 2H), 7.19 – 7.15 (m, 1H), 3.47 (t,  $J = 6.8$  Hz, 2H), 2.41 (q,  $J = 7.3$  Hz, 2H), 2.14 – 2.04 (m, 2H), 1.80 (s, 3H), 1.77 – 1.71 (m, 2H), 1.52 – 1.43 (m, 4H), 1.10 (t,  $J = 7.3$  Hz, 3H).  $^{13}\text{C}$  NMR (100 MHz, Chloroform-*d*)  $\delta$  200.98, 138.38, 128.23, 126.11, 125.78, 106.70, 103.35, 45.15, 34.17, 32.54, 26.97, 26.74, 23.18, 19.12, 12.77. HRMS (EI+) calcd for  $[\text{C}_{17}\text{H}_{23}\text{Cl}]^+$  ( $[\text{M}]^+$ ): 262.1488, found: 262.1485.

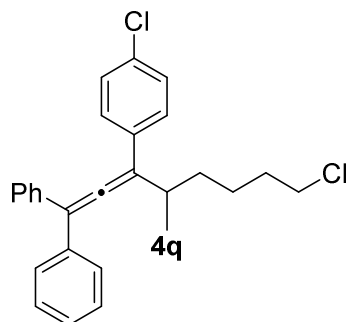

Following the general procedure A, **4q** was obtained as a liquid (27 mg, 32% yield).  $^1\text{H}$  NMR (400 MHz, Chloroform-*d*)  $\delta$  7.43 – 7.26 (m, 14H), 3.37 – 3.22 (m, 2H), 2.84 – 2.74 (m, 1H), 1.71 – 1.54 (m, 4H), 1.52 – 1.38 (m, 2H), 1.36 – 1.22 (m, 3H).  $^{13}\text{C}$  NMR (100 MHz, Chloroform-*d*)  $\delta$  206.11, 136.68, 136.49, 134.78, 132.76, 128.81, 128.54, 128.53, 128.25, 128.15, 127.77, 127.49, 127.45, 114.30, 114.14, 44.93, 35.59, 34.45, 32.81, 25.00, 20.61. HRMS (DART) calcd for  $[\text{C}_{27}\text{H}_{27}\text{Cl}_2]^+$  ( $[\text{M}+\text{H}]^+$ ): 421.1484, found: 421.1481.

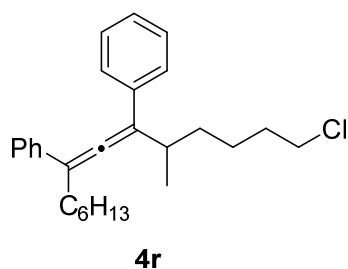

Following the general procedure A, **4r** was obtained as a liquid (16 mg, 20% yield).  $^1\text{H}$  NMR (400 MHz, Chloroform-*d*)  $\delta$  7.48 – 7.38 (m, 4H), 7.35 – 7.26 (m, 4H), 7.24 – 7.16 (m, 2H), 3.51 (t,  $J$  = 6.7 Hz, 1.5 H), 3.35 (t,  $J$  = 6.7, Hz, 0.5H), 2.88 – 2.74 (m, 1H), 2.54 (t,  $J$  = 7.6 Hz, 2H), 1.77 (m, 1.5H), 1.61 – 1.54 (m, 3.5H), 1.43 – 1.36 (m, 3H), 1.29 – 1.24 (m, 6H), 1.19 (dd,  $J$  = 6.8, 1.8 Hz, 3H), 0.87 – 0.84 (m, 3H).  $^{13}\text{C}$  NMR (100 MHz, Chloroform-*d*)  $\delta$  204.53, 136.98, 136.83, 128.51, 128.45, 126.70, 126.66, 126.40, 125.77, 45.11, 35.79, 34.13, 32.89, 31.80, 30.50, 29.55, 28.41, 24.96, 22.72, 20.25, 14.12. HRMS (DART) calcd for  $[\text{C}_{27}\text{H}_{36}\text{Cl}]^+$  ( $[\text{M}+\text{H}]^+$ ): 395.2500, found: 395.2497.

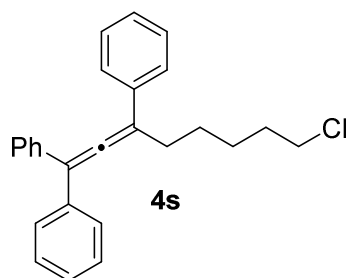

Following the general procedure A, **4s** was obtained as a liquid (34 mg, 46% yield).  $^1\text{H}$  NMR (400 MHz, Chloroform-*d*)  $\delta$  7.53 – 7.46 (m, 2H), 7.44 – 7.37 (m, 4H), 7.37 – 7.30 (m, 6H), 7.30 – 7.20 (m, 3H), 3.36 (t,  $J$  = 6.8 Hz, 2H), 2.64 (t,  $J$  = 7.4 Hz, 2H), 1.82 – 1.60 (m, 4H), 1.52 – 1.41 (m, 2H).  $^{13}\text{C}$  NMR (100 MHz, Chloroform-*d*)  $\delta$  206.99, 136.85, 136.11, 128.65, 128.51, 128.32, 127.38, 127.17, 126.05, 113.12, 108.77, 45.05, 32.57, 30.18, 27.23, 26.87. HRMS (DART) calcd for  $[\text{C}_{26}\text{H}_{26}\text{Cl}]^+$  ( $[\text{M}+\text{H}]^+$ ): 373.1718, found: 373.1714.

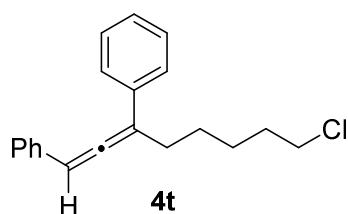

Following the general procedure A, **4t** was obtained as a liquid (19 mg, 32% yield).  $^1\text{H}$  NMR (400 MHz, Chloroform-*d*)  $\delta$  7.48 – 7.41 (m, 2H), 7.36 – 7.29 (m, 6H), 7.24 – 7.18 (m, 2H), 6.54 (t,  $J$  = 3.2 Hz, 1H), 3.48 (t,  $J$  = 6.7 Hz, 2H), 2.65 – 2.52 (m, 2H), 1.84 – 1.72 (m, 2H), 1.69 – 1.51 (m, 4H).  $^{13}\text{C}$  NMR (100 MHz,  $\text{CDCl}_3$ )  $\delta$  206.42, 136.06, 134.54, 128.78, 128.57, 127.15, 127.12, 126.79, 126.10, 109.65, 98.15, 45.11, 32.49, 29.93, 27.17, 26.81. HRMS (DART) calcd for  $[\text{C}_{20}\text{H}_{22}\text{Cl}]^+$  ( $[\text{M}+\text{H}]^+$ ): 297.1405, found: 297.1403.

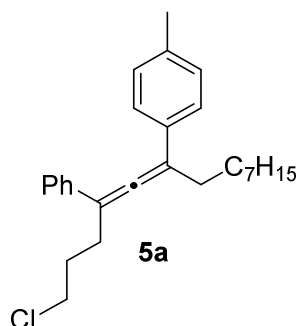

Following the general procedure A, **5a** was obtained as a liquid (50 mg, 63% yield).  $^1\text{H}$  NMR (400 MHz, Chloroform-*d*)  $\delta$  7.48 – 7.40 (m, 2H), 7.37 – 7.25 (m, 4H), 7.20 (d,  $J$  = 7.2 Hz, 1H), 7.12 (d,  $J$  = 8.0 Hz, 2H), 3.60 (t,  $J$  = 6.4 Hz, 2H), 2.71 (t,  $J$  = 7.5 Hz, 2H), 2.52 (d,  $J$  = 8.0 Hz, 2H), 2.33 (s, 3H), 2.11 – 1.97 (m, 2H), 1.63 – 1.49 (m, 2H), 1.43 – 1.33 (m, 2H), 1.32 – 1.19 (m, 8H), 0.86 (t,  $J$  = 6.8 Hz, 3H).  $^{13}\text{C}$  NMR (100 MHz, Chloroform-*d*)  $\delta$  204.71, 136.70, 133.62, 129.29, 128.54, 126.86, 125.86, 109.94, 107.69, 44.99, 31.89, 31.02, 30.50, 29.79, 29.55, 29.39, 28.22, 27.56, 22.72, 21.14, 14.17. HRMS (DART) calcd for  $[\text{C}_{27}\text{H}_{36}\text{Cl}]^+$  ( $[\text{M}+\text{H}]^+$ ): 395.2500, found: 395.2498.

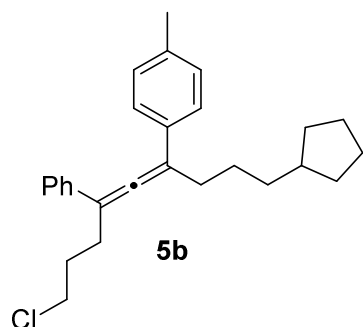

Following the general procedure A, **5b** was obtained as a liquid (48 mg, 61% yield).  $^1\text{H}$  NMR (400 MHz, Chloroform-*d*)  $\delta$  7.50 – 7.40 (m, 2H), 7.36 – 7.26 (m, 4H), 7.21 (d,  $J$  = 7.5 Hz, 1H), 7.12 (d,  $J$  = 7.9 Hz, 2H), 3.60 (t,  $J$  = 6.5 Hz, 2H), 2.71 (t,  $J$  = 7.5 Hz, 2H), 2.53 (t,  $J$  = 7.6 Hz, 2H), 2.32 (s, 3H), 2.10 – 1.98 (m, 2H), 1.79 – 1.63 (m, 3H), 1.62 – 1.43 (m, 6H), 1.41 – 1.35 (m, 2H), 1.09 – 0.94 (m, 2H).  $^{13}\text{C}$  NMR (100 MHz, Chloroform-*d*)  $\delta$  204.74, 136.70, 133.63, 129.30, 128.55, 126.87, 125.88, 125.87, 109.92, 107.71, 44.99, 39.98, 36.27, 32.75, 32.71, 31.03, 30.72, 27.58, 27.32, 25.22, 21.15. HRMS (DART) calcd for  $[\text{C}_{27}\text{H}_{34}\text{Cl}]^+$  ( $[\text{M}+\text{H}]^+$ ): 393.2344, found: 393.2341.

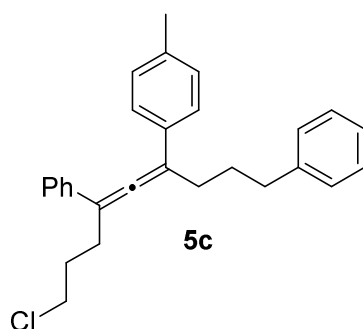

Following the general procedure A, **5c** was obtained as a liquid (41 mg, 51% yield).  $^1\text{H}$  NMR (600 MHz, Chloroform-*d*)  $\delta$  7.49 – 7.44 (m, 2H), 7.36 – 7.29 (m, 4H), 7.29 – 7.25 (m, 2H), 7.25 – 7.21 (m, 1H), 7.18 (t,  $J$  = 6.8 Hz, 1H), 7.16 – 7.10 (m, 4H), 3.60 (t,  $J$  = 6.4 Hz, 2H), 2.79 – 2.67 (m, 4H), 2.60 (t,  $J$  = 7.6 Hz, 2H), 2.34 (s, 3H), 2.11 – 2.01 (m, 2H), 1.98 – 1.87 (m, 2H).  $^{13}\text{C}$  NMR (150 MHz, Chloroform-*d*)  $\delta$  204.72, 142.29, 136.89, 136.64, 133.54, 129.40, 128.69, 128.58,

128.43, 127.06, 125.96, 125.90, 109.70, 108.15, 45.02, 35.92, 31.08, 30.04, 29.88, 27.66, 21.20.  
HRMS (DART) calcd for  $[C_{28}H_{30}Cl]^+$  ( $[M+H]^+$ ): 401.2031, found: 401.2027.

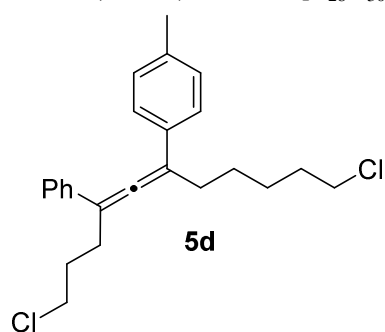

Following the general procedure A, **5d** was obtained as a liquid (56 mg, 72% yield).  $^1H$  NMR (400 MHz, Chloroform-*d*)  $\delta$  7.48 – 7.38 (m, 2H), 7.37 – 7.26 (m, 4H), 7.21 (t,  $J = 7.5$  Hz, 1H), 7.13 (d,  $J = 8.0$  Hz, 2H), 3.61 (t,  $J = 6.4$  Hz, 2H), 3.46 (t,  $J = 6.7$  Hz, 2H), 2.70 (t,  $J = 7.6$  Hz, 2H), 2.56 (t,  $J = 7.2$  Hz, 2H), 2.33 (s, 3H), 2.13 – 1.98 (m, 2H), 1.80 – 1.70 (m, 2H), 1.65 – 1.47 (m, 5H).  $^{13}C$  NMR (100 MHz, Chloroform-*d*)  $\delta$  204.62, 136.86, 136.55, 133.39, 129.35, 128.60, 126.98, 125.85, 125.81, 109.56, 107.99, 45.13, 44.96, 32.55, 31.01, 30.30, 27.57, 27.42, 27.00, 21.15. HRMS (DART) calcd for  $[C_{24}H_{29}Cl_2]^+$  ( $[M+H]^+$ ): 387.1641, found: 387.1638.

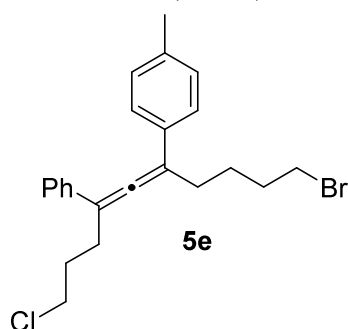

Following the general procedure A, **5e** was obtained as a liquid (51 mg, 54% yield).  $^1H$  NMR (400 MHz, Chloroform-*d*)  $\delta$  7.47 – 7.39 (m, 2H), 7.37 – 7.27 (m, 4H), 7.22 (t,  $J = 7.3$  Hz, 1H), 7.13 (d,  $J = 8.0$  Hz, 2H), 3.61 (t,  $J = 6.4$  Hz, 2H), 3.37 (t,  $J = 6.8$  Hz, 2H), 2.72 (t,  $J = 7.5$  Hz, 2H), 2.57 (t,  $J = 7.6$  Hz, 2H), 2.33 (s, 3H), 2.11 – 2.00 (m, 2H), 1.99 – 1.90 (m, 2H), 1.79 – 1.65 (m, 2H).  $^{13}C$  NMR (100 MHz, Chloroform-*d*)  $\delta$  204.60, 136.94, 136.44, 133.24, 129.39, 128.64, 127.06, 125.88, 125.81, 109.25, 108.22, 44.94, 33.57, 32.64, 31.02, 29.57, 27.63, 26.65, 21.16. HRMS (EI+) calcd for  $[C_{23}H_{26}ClBr]^+$  ( $[M]^+$ ): 416.0906, found: 416.0904.

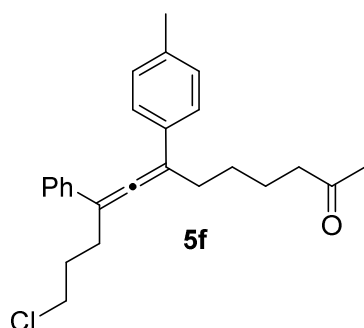

Following the general procedure A, **5f** was obtained as a liquid (40 mg, 52% yield).  $^1H$  NMR (600 MHz, Chloroform-*d*)  $\delta$  7.45 – 7.42 (m, 2H), 7.34 – 7.29 (m, 4H), 7.24 – 7.20 (m, 1H), 7.13 (d,  $J = 8.1$  Hz, 2H), 3.61 (t,  $J = 6.4$  Hz, 2H), 2.72 (t,  $J = 7.5$  Hz, 2H), 2.56 (t,  $J = 7.5$  Hz, 2H), 2.41 (t,  $J = 7.5$  Hz, 2H), 2.34 (s, 3H), 2.08 – 2.01 (m, 5H), 1.71 – 1.65 (m, 2H), 1.62 – 1.51 (m, 2H).  $^{13}C$  NMR

(150 MHz, Chloroform-*d*)  $\delta$  209.10, 204.67, 136.93, 136.61, 133.41, 129.42, 128.68, 127.06, 125.91, 125.88, 109.58, 108.06, 45.02, 43.69, 31.06, 30.36, 29.92, 27.69, 27.63, 23.89, 21.20. HRMS (DART) calcd for  $[C_{25}H_{30}OCl]^+$  ( $[M+H]^+$ ): 381.1980, found: 381.1977.

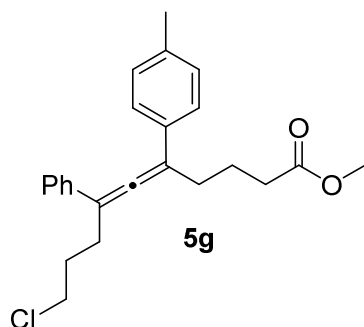

Following the general procedure **A**, **5g** was obtained as a liquid (46 mg, 60% yield).  $^1H$  NMR (600 MHz, Chloroform-*d*)  $\delta$  7.46 – 7.43 (m, 2H), 7.35 – 7.31 (m, 4H), 7.25 – 7.21 (m, 1H), 7.14 (d,  $J$  = 8.2 Hz, 2H), 3.65 (s, 3H), 3.62 (t,  $J$  = 6.5 Hz, 2H), 2.73 (t,  $J$  = 7.5 Hz, 2H), 2.60 (t,  $J$  = 7.7 Hz, 2H), 2.42 (t,  $J$  = 7.3 Hz, 2H), 2.34 (s, 3H), 2.11 – 2.02 (m, 2H), 1.96 – 1.87 (m, 2H).  $^{13}C$  NMR (150 MHz, Chloroform-*d*)  $\delta$  204.62, 173.99, 137.01, 136.47, 133.25, 129.44, 128.69, 127.12, 125.96, 125.88, 109.21, 108.44, 51.67, 45.01, 33.88, 31.06, 29.94, 27.68, 23.49, 21.21. HRMS (DART) calcd for  $[C_{24}H_{28}O_2Cl]^+$  ( $[M+H]^+$ ): 383.1772, found: 383.1769.

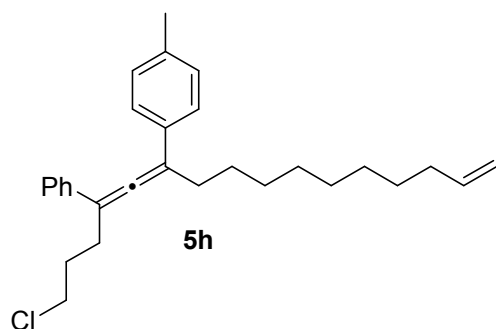

Following the general procedure **A**, **5h** was obtained as a liquid (53 mg, 63% yield).  $^1H$  NMR (600 MHz, Chloroform-*d*)  $\delta$  7.48 – 7.44 (m, 2H), 7.35 – 7.31 (m, 4H), 7.25 – 7.21 (m, 1H), 7.17 – 7.11 (m, 2H), 5.86 – 5.77 (m, 1H), 5.04 – 4.97 (m, 1H), 4.97 – 4.90 (m, 1H), 3.63 (t,  $J$  = 6.5 Hz, 2H), 2.73 (t,  $J$  = 7.5 Hz, 2H), 2.55 (d,  $J$  = 7.8 Hz, 2H), 2.35 (s, 3H), 2.14 – 1.99 (m, 4H), 1.65 – 1.50 (m, 2H), 1.42 – 1.34 (m, 4H), 1.31 – 1.24 (m, 6H).  $^{13}C$  NMR (150 MHz, Chloroform-*d*)  $\delta$  204.79, 139.39, 139.37, 136.80, 136.77, 133.68, 129.38, 128.63, 126.95, 125.94, 114.24, 110.01, 107.79, 45.06, 33.92, 31.09, 30.56, 29.83, 29.60, 29.21, 29.03, 28.27, 27.63, 21.21. HRMS (DART) calcd for  $[C_{29}H_{38}Cl]^+$  ( $[M+H]^+$ ): 421.2657, found: 421.2654.

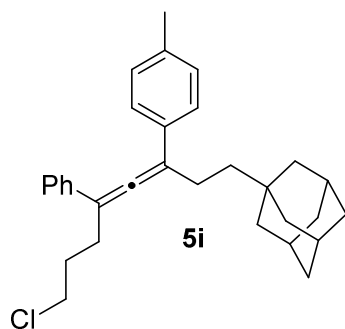

Following the general procedure **A**, **5i** was obtained as a liquid (44 mg, 49% yield).  $^1H$  NMR (400 MHz, Chloroform-*d*)  $\delta$  7.49 – 7.40 (m, 2H), 7.36 – 7.26 (m, 4H), 7.23 – 7.18 (m, 1H), 7.12 (d,  $J$  =

7.9 Hz, 2H), 3.61 (t,  $J = 6.4$  Hz, 2H), 2.72 (t,  $J = 7.2$  Hz, 2H), 2.55 – 2.47 (m, 2H), 2.33 (s, 3H), 2.12 – 2.00 (m, 2H), 1.96 (s, 3H), 1.76 – 1.60 (m, 6H), 1.58 – 1.48 (m, 6H), 1.39 – 1.33 (m, 2H).  $^{13}\text{C}$  NMR (100 MHz, Chloroform- $d$ )  $\delta$  204.59, 136.72, 136.68, 133.58, 129.28, 128.55, 126.83, 125.88, 125.85, 110.41, 107.54, 44.98, 42.89, 42.42, 37.27, 32.43, 30.96, 28.77, 27.46, 23.77, 21.14. HRMS (DART) calcd for  $[\text{C}_{31}\text{H}_{38}\text{Cl}]^+$  ( $[\text{M}+\text{H}]^+$ ): 445.2657, found: 445.2654.

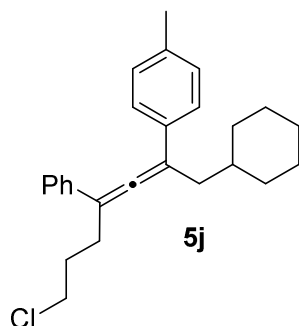

Following the general procedure A, **5j** was obtained as a liquid (45 mg, 60% yield).  $^1\text{H}$  NMR (600 MHz, Chloroform- $d$ )  $\delta$  7.47 – 7.41 (m, 2H), 7.37 – 7.28 (m, 4H), 7.24 – 7.20 (m, 1H), 7.18 – 7.09 (m, 2H), 3.61 (t,  $J = 6.5$  Hz, 2H), 2.80 – 2.66 (m, 2H), 2.52 – 2.39 (m, 2H), 2.35 (s, 3H), 2.15 – 2.02 (m, 2H), 1.88 – 1.78 (m, 2H), 1.72 – 1.65 (m, 2H), 1.64 – 1.53 (m, 2H), 1.23 – 1.10 (m, 3H), 1.03 – 0.89 (m, 2H).  $^{13}\text{C}$  NMR (150 MHz, Chloroform- $d$ )  $\delta$  205.50, 136.80, 136.75, 133.83, 129.36, 128.60, 126.89, 126.16, 126.05, 108.12, 106.59, 45.05, 38.73, 36.49, 33.78, 33.73, 31.20, 27.86, 26.60, 26.35, 26.33, 21.21. HRMS (DART) calcd for  $[\text{C}_{26}\text{H}_{32}\text{Cl}]^+$  ( $[\text{M}+\text{H}]^+$ ): 379.2187, found: 379.2184.

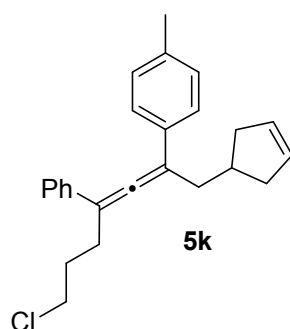

Following the general procedure A, **5k** was obtained as a liquid (14 mg, 19% yield).  $^1\text{H}$  NMR (400 MHz, Chloroform- $d$ )  $\delta$  7.49 – 7.41 (m, 2H), 7.37 – 7.29 (m, 4H), 7.24 – 7.19 (m, 1H), 7.13 (d,  $J = 8.0$  Hz, 2H), 5.69 – 5.56 (m, 2H), 3.61 (t,  $J = 6.5$  Hz, 2H), 2.72 (t,  $J = 7.6$  Hz, 2H), 2.67 – 2.60 (m, 2H), 2.59 – 2.41 (m, 3H), 2.33 (s, 3H), 2.17 – 1.99 (m, 4H).  $^{13}\text{C}$  NMR (100 MHz, Chloroform- $d$ )  $\delta$  205.29, 136.80, 136.46, 133.69, 129.90, 129.70, 129.30, 128.54, 126.89, 125.88, 125.81, 109.15, 107.65, 45.01, 39.59, 39.56, 37.66, 35.61, 31.02, 27.68, 21.12. HRMS (DART) calcd for  $[\text{C}_{25}\text{H}_{28}\text{Cl}]^+$  ( $[\text{M}+\text{H}]^+$ ): 363.1874, found: 363.1871.



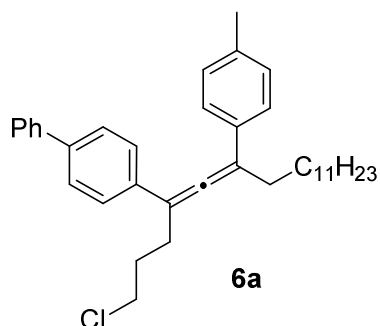

Following the general procedure **B**, **6a** was obtained as a liquid (63 mg, 60% yield).  $^1\text{H}$  NMR (600 MHz, Chloroform-*d*)  $\delta$  7.64 – 7.61 (m, 2H), 7.60 – 7.57 (m, 2H), 7.57 – 7.52 (m, 2H), 7.47 – 7.43 (m, 2H), 7.39 – 7.33 (m, 3H), 7.17 (d,  $J = 7.9$  Hz, 2H), 3.66 (t,  $J = 6.4$  Hz, 2H), 2.78 (t,  $J = 7.5$  Hz, 2H), 2.62 – 2.55 (m, 2H), 2.37 (s, 3H), 2.17 – 2.07 (m, 2H), 1.68 – 1.58 (m, 2H), 1.46 – 1.40 (m, 2H), 1.34 – 1.26 (m, 16H), 0.91 (t,  $J = 7.1$  Hz, 3H).  $^{13}\text{C}$  NMR (150 MHz, Chloroform-*d*)  $\delta$  205.09, 140.90, 139.78, 136.86, 135.78, 133.68, 129.44, 128.91, 127.35, 127.06, 126.36, 126.01, 110.20, 107.55, 45.05, 32.06, 31.15, 30.63, 29.90, 29.84, 29.80, 29.70, 29.52, 28.34, 27.69, 22.85, 21.23, 14.27. HRMS (DART) calcd for  $[\text{C}_{37}\text{H}_{48}\text{Cl}]^+$  ( $[\text{M}+\text{H}]^+$ ): 527.3439, found: 727.3434.

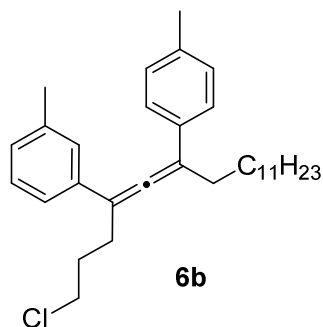

Following the general procedure **A**, **6b** was obtained as a liquid (64 mg, 69% yield).  $^1\text{H}$  NMR (400 MHz, Chloroform-*d*)  $\delta$  7.31 (d,  $J = 8.0$  Hz, 2H), 7.27 – 7.17 (m, 3H), 7.12 (d,  $J = 7.9$  Hz, 2H), 7.03 (d,  $J = 7.2$  Hz, 1H), 3.60 (t,  $J = 6.5$  Hz, 2H), 2.70 (t,  $J = 7.5$  Hz, 2H), 2.59 – 2.47 (m, 2H), 2.33 (s, 6H), 2.09 – 1.98 (m, 2H), 1.62 – 1.50 (m, 2H), 1.43 – 1.34 (m, 2H), 1.30 – 1.21 (m, 16H), 0.88 (t,  $J = 6.8$  Hz, 3H).  $^{13}\text{C}$  NMR (100 MHz, Chloroform-*d*)  $\delta$  204.70, 138.09, 136.64, 136.63, 133.71, 129.28, 128.45, 127.69, 126.52, 125.88, 123.02, 109.74, 107.69, 45.01, 31.99, 31.04, 30.49, 29.81, 29.75, 29.71, 29.62, 29.44, 28.21, 27.64, 22.77, 21.65, 21.14, 14.21. HRMS (DART) calcd for  $[\text{C}_{32}\text{H}_{46}\text{Cl}]^+$  ( $[\text{M}+\text{H}]^+$ ): 465.3283, found: 465.3279.

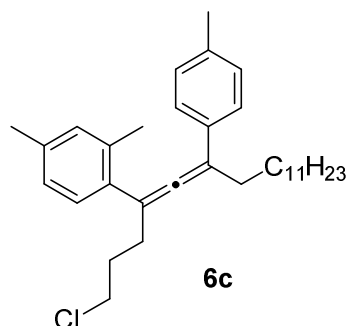

Following the general procedure **A**, **6c** was obtained as a liquid (53 mg, 55% yield).  $^1\text{H}$  NMR (400 MHz, Chloroform-*d*)  $\delta$  7.30 (d,  $J = 8.1$  Hz, 2H), 7.15 (d,  $J = 7.6$  Hz, 1H), 7.12 (d,  $J = 8.0$  Hz, 2H), 7.04 – 6.92 (m, 2H), 3.58 (t,  $J = 6.5$  Hz, 2H), 2.56 (d,  $J = 7.6$  Hz, 2H), 2.43 (d,  $J = 7.6$  Hz, 2H), 2.33 (s, 3H), 2.29 (s, 6H), 2.04 – 1.94 (m, 2H), 1.59 – 1.49 (m, 2H), 1.38 – 1.23 (m, 18H), 0.88 (t,

$J = 6.8$  Hz, 3H).  $^{13}\text{C}$  NMR (100 MHz, Chloroform-*d*)  $\delta$  202.53, 136.57, 136.27, 135.64, 135.01, 134.30, 131.37, 129.09, 128.16, 126.54, 126.08, 106.58, 106.53, 44.86, 32.00, 31.62, 31.02, 30.68, 29.77, 29.73, 29.72, 29.65, 29.44, 28.34, 22.77, 21.13, 21.04, 20.69, 14.21. HRMS (DART) calcd for  $[\text{C}_{33}\text{H}_{48}\text{Cl}]^+$  ( $[\text{M}+\text{H}]^+$ ): 479.3439, found: 479.3434.

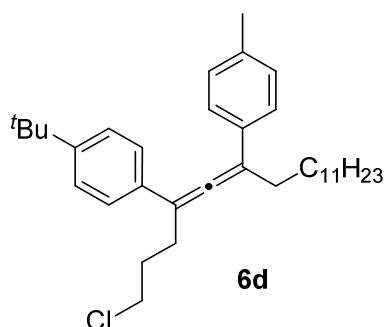

Following the general procedure **B**, **6d** was obtained as a liquid (35 mg, 35% yield).  $^1\text{H}$  NMR (400 MHz, Chloroform-*d*)  $\delta$  7.34 – 7.21 (m, 6H), 7.03 (d,  $J = 7.7$  Hz, 2H), 3.52 (t,  $J = 6.4$  Hz, 2H), 2.62 (t,  $J = 7.4$  Hz, 2H), 2.49 – 2.40 (m, 2H), 2.24 (s, 3H), 2.02 – 1.91 (m, 2H), 1.53 – 1.45 (m, 2H), 1.36 – 1.26 (m, 2H), 1.23 (s, 9H), 1.21 – 1.14 (m, 16H), 0.80 (t,  $J = 6.7$  Hz, 3H).  $^{13}\text{C}$  NMR (100 MHz, Chloroform-*d*)  $\delta$  204.57, 149.85, 136.59, 133.76, 133.66, 129.25, 125.86, 125.54, 125.48, 109.85, 107.37, 45.03, 34.52, 31.99, 31.36, 31.05, 30.54, 29.84, 29.75, 29.71, 29.61, 29.43, 28.26, 27.53, 22.77, 21.14, 14.20. HRMS (DART) calcd for  $[\text{C}_{35}\text{H}_{52}\text{Cl}]^+$  ( $[\text{M}+\text{H}]^+$ ): 507.3752, found: 507.3748.

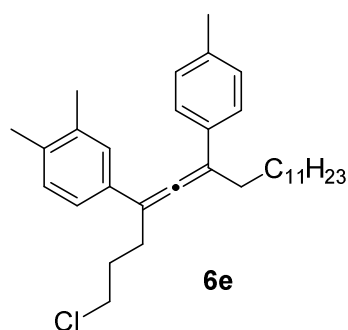

Following the general procedure **B**, **6e** was obtained as a liquid (34 mg, 36% yield).  $^1\text{H}$  NMR (400 MHz, Chloroform-*d*)  $\delta$  7.34 – 7.28 (m, 2H), 7.22 – 7.15 (m, 2H), 7.11 (d,  $J = 7.9$  Hz, 2H), 7.08 (d,  $J = 7.9$  Hz, 1H), 3.60 (t,  $J = 6.5$  Hz, 2H), 2.68 (t,  $J = 7.5$  Hz, 2H), 2.57 – 2.48 (m, 2H), 2.33 (s, 3H), 2.24 (s, 6H), 2.09 – 1.98 (m, 2H), 1.60 – 1.51 (m, 3H), 1.41 – 1.34 (m, 2H), 1.30 – 1.21 (m, 16H), 0.88 (t,  $J = 6.8$  Hz, 3H).  $^{13}\text{C}$  NMR (100 MHz, Chloroform-*d*)  $\delta$  204.41, 136.65, 136.53, 135.34, 133.86, 129.83, 129.23, 127.08, 125.85, 123.29, 109.57, 107.50, 45.03, 31.98, 31.05, 30.49, 29.80, 29.74, 29.70, 29.61, 29.42, 28.20, 27.64, 22.75, 21.12, 20.01, 19.47, 14.19. HRMS (DART) calcd for  $[\text{C}_{33}\text{H}_{48}\text{Cl}]^+$  ( $[\text{M}+\text{H}]^+$ ): 479.3439, found: 479.3434.

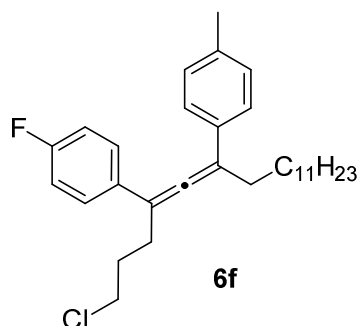

Following the general procedure A, **6f** was obtained as a liquid (58 mg, 62% yield).  $^1\text{H}$  NMR (400 MHz, Chloroform-*d*)  $\delta$  7.44 – 7.35 (m, 2H), 7.30 (d,  $J$  = 8.0 Hz, 2H), 7.13 (d,  $J$  = 8.0 Hz, 2H), 6.99 (t,  $J$  = 8.7 Hz, 2H), 3.60 (t,  $J$  = 6.4 Hz, 2H), 2.68 (t,  $J$  = 7.5 Hz, 2H), 2.53 (t,  $J$  = 7.6 Hz, 2H), 2.33 (s, 3H), 2.09 – 1.97 (m, 2H), 1.61 – 1.48 (m, 2H), 1.41 – 1.33 (m, 2H), 1.31 – 1.21 (m, 16H), 0.88 (t,  $J$  = 6.7 Hz, 3H).  $^{13}\text{C}$  NMR (100 MHz, Chloroform-*d*)  $\delta$  204.39 (d,  $J$  = 2.0 Hz), 161.92 (d,  $J$  = 246.1 Hz), 136.82, 133.47, 132.69, 132.65, 129.32, 127.32 (d,  $J$  = 7.9 Hz), 125.83, 115.38 (d,  $J$  = 21.4 Hz), 110.15, 106.93, 44.91, 31.97, 30.93, 30.48, 29.76, 29.73, 29.70, 29.68, 29.58, 29.42, 28.20, 27.73, 22.75, 21.13, 14.19. HRMS (DART) calcd for  $[\text{C}_{31}\text{H}_{43}\text{ClF}]^+$  ( $[\text{M}+\text{H}]^+$ ): 469.3032, found: 469.3028.

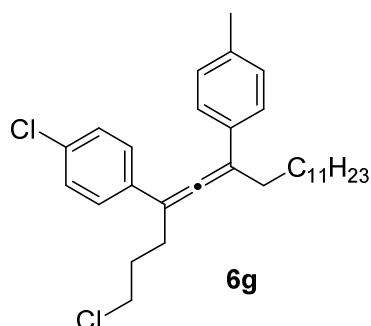

Following the general procedure B, **6g** was obtained as a liquid (42 mg, 43% yield).  $^1\text{H}$  NMR (600 MHz, Chloroform-*d*)  $\delta$  7.38 – 7.33 (m, 2H), 7.32 – 7.25 (m, 4H), 7.16 – 7.11 (m, 2H), 3.61 (t,  $J$  = 6.4 Hz, 2H), 2.68 (t,  $J$  = 7.5 Hz, 2H), 2.53 (t,  $J$  = 7.6 Hz, 2H), 2.34 (s, 3H), 2.10 – 1.97 (m, 2H), 1.62 – 1.49 (m, 2H), 1.40 – 1.34 (m, 2H), 1.31 – 1.22 (m, 16H), 0.88 (t,  $J$  = 7.1 Hz, 3H).  $^{13}\text{C}$  NMR (150 MHz, Chloroform-*d*)  $\delta$  204.79, 137.00, 135.33, 133.35, 132.61, 129.42, 128.71, 127.15, 125.92, 110.47, 107.04, 44.92, 32.04, 30.97, 30.52, 29.81, 29.79, 29.77, 29.75, 29.63, 29.48, 28.24, 27.59, 22.82, 21.20, 14.25. HRMS (DART) calcd for  $[\text{C}_{31}\text{H}_{43}\text{Cl}_2]^+$  ( $[\text{M}+\text{H}]^+$ ): 485.2736, found: 485.2732.

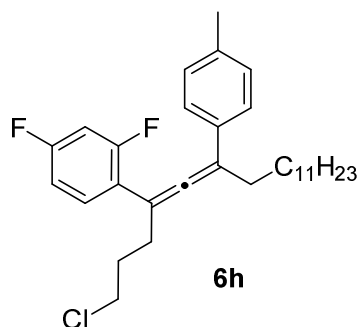

Following the general procedure B, **6h** was obtained as a liquid (75 mg, 77% yield).  $^1\text{H}$  NMR (600 MHz, Chloroform-*d*)  $\delta$  7.36 – 7.27 (m, 3H), 7.15 (d,  $J$  = 7.9 Hz, 2H), 6.88 – 6.76 (m, 2H), 3.59 (t,

$J = 6.5$  Hz, 2H), 2.67 (d,  $J = 7.2$  Hz, 2H), 2.49 (t,  $J = 7.8$  Hz, 2H), 2.35 (s, 3H), 2.06 – 1.93 (m, 2H), 1.63 – 1.51 (m, 2H), 1.39 – 1.24 (m, 18H), 0.90 (t,  $J = 7.0$  Hz, 3H).  $^{13}\text{C}$  NMR (150 MHz, Chloroform-*d*)  $\delta$  204.91, 161.93 (dd,  $J = 267.5, 11.5$  Hz), 160.28 (dd,  $J = 270.9, 12.2$  Hz), 136.82, 133.56, 130.26 (dd,  $J = 8.8, 5.3$  Hz), 129.33, 126.07, 121.82 (dd,  $J = 12.9, 2.9$  Hz), 121.82 (dd,  $J = 12.9, 2.9$  Hz), 108.11, 104.47 (t,  $J = 25.9$  Hz), 102.58, 44.71, 32.05, 31.11, 30.45, 29.91, 29.80, 29.77, 29.72, 29.66, 29.49, 28.12, 22.82, 21.19, 14.24. HRMS (DART) calcd for  $[\text{C}_{31}\text{H}_{42}\text{ClF}_2]^+$  ( $[\text{M}+\text{H}]^+$ ): 487.2938, found: 487.2932.

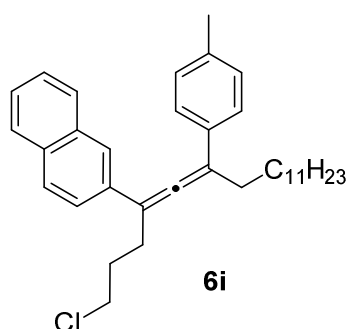

Following the general procedure **B**, **6i** was obtained as a liquid (61 mg, 61% yield).  $^1\text{H}$  NMR (600 MHz, Chloroform-*d*)  $\delta$  7.86 – 7.83 (m, 2H), 7.80 (d,  $J = 7.9$  Hz, 1H), 7.74 (d,  $J = 8.6$  Hz, 1H), 7.62 (dd,  $J = 8.6, 1.9$  Hz, 1H), 7.49 – 7.43 (m, 2H), 7.38 – 7.36 (m, 2H), 7.16 (d,  $J = 8.0$  Hz, 2H), 3.67 (t,  $J = 6.4$  Hz, 2H), 2.87 (t,  $J = 7.5$  Hz, 2H), 2.61 (t,  $J = 7.2$  Hz, 2H), 2.36 (s, 3H), 2.19 – 2.11 (m, 2H), 1.67 – 1.57 (m, 2H), 1.45 – 1.39 (m, 2H), 1.31 – 1.23 (m, 16H), 0.90 (t,  $J = 7.1$  Hz, 3H).  $^{13}\text{C}$  NMR (150 MHz, Chloroform-*d*)  $\delta$  205.54, 136.88, 134.20, 133.83, 133.67, 132.64, 129.45, 129.40, 128.14, 128.03, 127.67, 126.26, 126.03, 125.98, 125.81, 125.33, 123.47, 110.33, 108.12, 45.11, 32.05, 31.14, 30.62, 29.87, 29.79, 29.76, 29.68, 29.49, 28.31, 27.63, 22.83, 21.22, 14.26. HRMS (DART) calcd for  $[\text{C}_{35}\text{H}_{46}\text{Cl}]^+$  ( $[\text{M}+\text{H}]^+$ ): 501.3283, found: 501.3278.

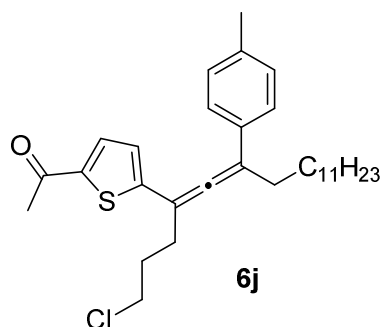

Following the general procedure **B**, **6j** was obtained as a liquid (69 mg, 69% yield).  $^1\text{H}$  NMR (600 MHz, Chloroform-*d*)  $\delta$  7.57 (d,  $J = 4.0$  Hz, 1H), 7.31 – 7.25 (m, 2H), 7.12 (d,  $J = 8.0$  Hz, 2H), 7.00 (d,  $J = 4.0$  Hz, 1H), 3.59 (t,  $J = 6.4$  Hz, 2H), 2.70 – 2.64 (m, 2H), 2.56 – 2.52 (m, 2H), 2.50 (s, 3H), 2.33 (s, 3H), 2.09 – 2.01 (m, 2H), 1.58 – 1.52 (m, 2H), 1.41 – 1.36 (m, 2H), 1.29 – 1.23 (m, 16H), 0.87 (t,  $J = 7.0$  Hz, 3H).  $^{13}\text{C}$  NMR (150 MHz, Chloroform-*d*)  $\delta$  205.25, 190.63, 151.59, 142.28, 137.49, 133.38, 132.60, 129.46, 126.27, 123.62, 111.90, 103.73, 44.60, 32.03, 30.92, 30.76, 29.78, 29.76, 29.61, 29.48, 28.43, 28.13, 26.56, 22.81, 21.23, 14.24. HRMS (DART) calcd for  $[\text{C}_{31}\text{H}_{44}\text{OCIS}]^+$  ( $[\text{M}+\text{H}]^+$ ): 499.2796, found: 499.2792.

# Synthetic applications

## a) Synthesis of indenyl iodide **7** with NIS

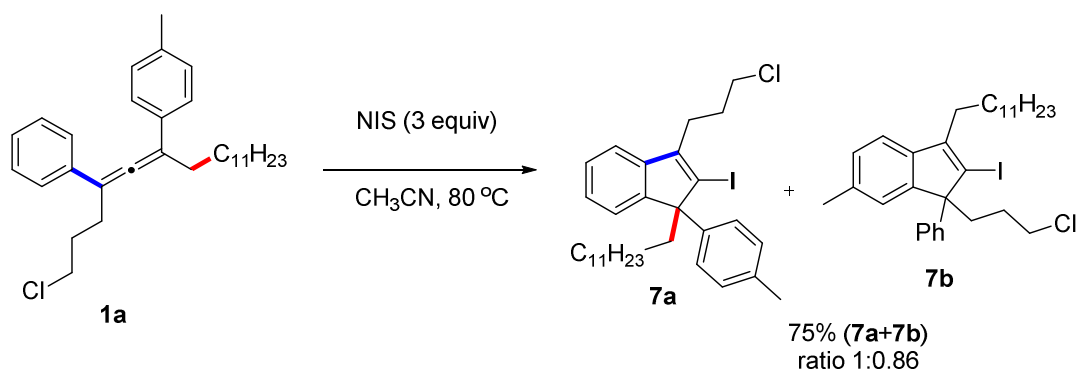

In a flame-dried Schlenk tube was charged with allene (**1a**, 0.2 mmol), NIS (0.6 mmol) and CH<sub>3</sub>CN (1 mL). The resulting suspension was stirred at 80 °C for 10 h. Upon completion of the reaction as monitored by TLC, the solvent was concentrated under vacuum. The crude residue was purified by flash column chromatography on silica gel to give the products **7a** and **7b** as a mixture in 75% yield.

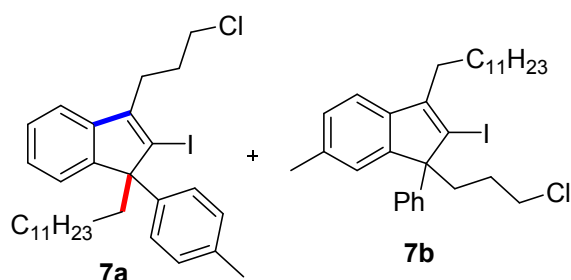

<sup>1</sup>H NMR (400 MHz, Chloroform-*d*) δ 7.37 – 7.18 (m, 3H), 7.14 – 6.78 (m, 5H), 3.70 – 3.34 (m, 2H), 2.88 – 2.53 (m, 2H), 2.51 – 2.00 (m, 6H), 1.77 – 1.55 (m, 1H), 1.46 – 1.05 (m, 20H), 0.89 – 0.85 (m, 3H). <sup>13</sup>C NMR (100 MHz, Chloroform-*d*) δ 152.40, 151.95, 148.43, 146.03, 143.01, 141.73, 140.75, 138.66, 136.45, 135.74, 129.20, 128.47, 127.59, 126.90, 126.69, 126.65, 126.55, 125.82, 124.13, 123.33, 118.79, 118.74, 116.58, 112.66, 63.58, 62.88, 45.58, 44.62, 34.55, 32.01, 31.99, 31.96, 31.15, 29.92, 29.90, 29.76, 29.72, 29.71, 29.68, 29.66, 29.62, 29.60, 29.44, 29.42, 29.39, 28.16, 27.20, 26.30, 22.78, 22.70, 21.56, 21.11, 14.23. HRMS (DART) calcd for [C<sub>31</sub>H<sub>42</sub>ClI]<sup>+</sup> ([M+H]<sup>+</sup>): 576.2014, found: 576.2008.

## b) Synthesis of 1*H*-indene **8**

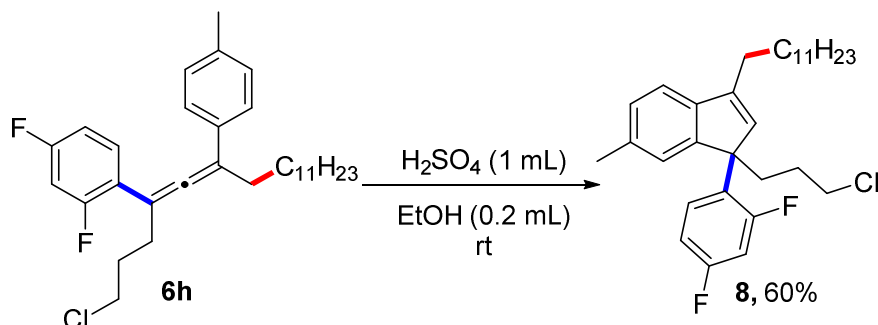

In a flame-dried Schlenk tube was charged with allene (**6i**, 0.1 mmol),  $\text{H}_2\text{SO}_4$  (1 mL) and  $\text{CH}_3\text{CH}_2\text{OH}$  (0.2 mL). The resulting suspension was stirred at room temperature for 1 h. Upon completion of the reaction as monitored by TLC, the solvent was concentrated under vacuum. The crude residue was purified by flash column chromatography on silica gel to give the product **8** in 60% yield.

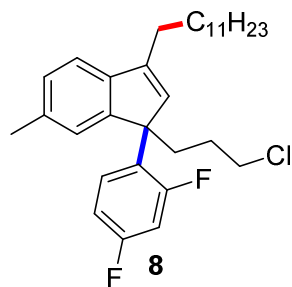

$^1\text{H}$  NMR (400 MHz, Chloroform-*d*)  $\delta$  7.22 (s, 1H), 7.22 – 7.15 (m, 2H), 7.12 (d,  $J = 8.0$  Hz, 1H), 6.85 – 6.75 (m, 1H), 6.72 – 6.60 (m, 1H), 6.25 (s, 1H), 3.40 (t,  $J = 6.7$  Hz, 2H), 2.58 – 2.43 (m, 3H), 2.41 (s, 3H), 2.22 – 2.07 (m, 1H), 1.70 – 1.56 (m, 3H), 1.42 – 1.23 (m, 19H), 0.88 (t,  $J = 6.7$  Hz, 3H).  $^{13}\text{C}$  NMR (100 MHz, Chloroform-*d*)  $\delta$  162.17 (dd,  $J = 250.2, 11.5$  Hz), 161.80 (dd,  $J = 247.8, 12.3$  Hz), 149.40, 143.33, 142.02, 134.14 (d,  $J = 3.0$  Hz), 134.12, 129.00 (dd,  $J = 9.1, 6.7$  Hz), 127.90, 125.81 (dd,  $J = 12.3, 3.8$  Hz), 124.59 (d,  $J = 2.8$  Hz), 119.60, 110.61 (dd,  $J = 20.3, 3.4$  Hz), 104.68 (dd,  $J = 28.0, 25.0$  Hz), 57.28 (d,  $J = 3.2$  Hz), 45.50, 33.87, 33.81, 31.96, 29.72, 29.69, 29.67, 29.53, 29.40, 28.17, 27.90, 27.52, 22.74, 21.72, 14.17. HRMS (DART) calcd for  $[\text{C}_{31}\text{H}_{42}\text{ClF}_2]^+$  ( $[\text{M}+\text{H}]^+$ ): 487.2938, found: 487.2934.

### c) Synthesis of 2*H*-pyran **9**

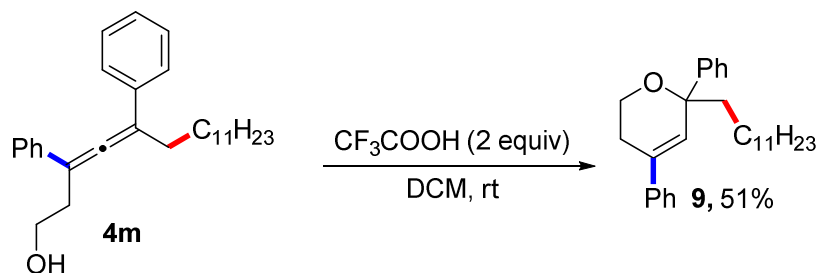

In a flame-dried Schlenk tube was charged with allene (**4m**, 0.1 mmol),  $\text{CF}_3\text{COOH}$  (2 equiv) and DCM (0.2 mL). The resulting suspension was stirred at room temperature for 1 h. Upon completion of the reaction as monitored by TLC, the solvent was concentrated under vacuum. The crude residue was purified by flash column chromatography on silica gel to give the product **9** in 51% yield.

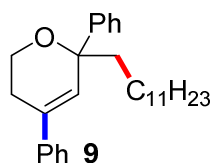

$^1\text{H}$  NMR (400 MHz, Chloroform-*d*)  $\delta$  7.39 (d,  $J = 7.3$  Hz, 4H), 7.33 – 7.24 (m, 4H), 7.24 – 7.20 (m, 1H), 7.20 – 7.15 (m, 1H), 6.44 (s, 1H), 3.99 – 3.86 (m, 1H), 3.57 (td,  $J = 11.1, 3.6$  Hz, 1H), 2.75 – 2.56 (m, 1H), 2.23 – 2.14 (m, 1H), 1.87 – 1.66 (m, 2H), 1.24 – 1.12 (m, 20H), 0.80 (t,  $J = 6.8$  Hz, 3H).  $^{13}\text{C}$  NMR (100 MHz, Chloroform-*d*)  $\delta$  145.95, 140.62, 134.90, 128.48, 128.21, 127.46, 126.74, 126.19, 125.10, 78.34, 60.47, 43.98, 31.95, 30.03, 29.67, 29.60, 29.39, 27.25, 23.90, 22.73, 14.17. HRMS (DART) calcd for  $[\text{C}_{29}\text{H}_{41}\text{O}]^+$  ( $[\text{M}+\text{H}]^+$ ): 405.3152, found: 405.3149.

### d) Synthesis of 2*H*-pyran **10**

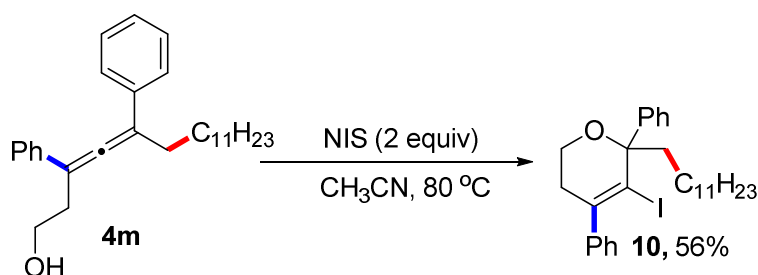

In a flame-dried Schlenk tube was charged with allene (**4m**, 0.1 mmol), NIS (2 equiv) and  $\text{CH}_3\text{CN}$  (0.2 mL). The resulting suspension was stirred at room temperature for 10 h. Upon completion of the reaction as monitored by TLC, the solvent was concentrated under vacuum. The crude residue was purified by flash column chromatography on silica gel to give the product **10** in 56% yield.

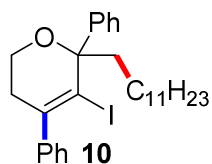

$^1\text{H}$  NMR (400 MHz, Chloroform-*d*)  $\delta$  7.67 – 7.60 (m, 2H), 7.44 – 7.31 (m, 6H), 7.25 – 7.20 (m, 2H), 3.78 – 3.68 (m, 1H), 3.67 – 3.58 (m, 1H), 2.88 – 2.74 (m, 1H), 2.43 – 2.33 (m, 2H), 2.27 – 2.18 (m, 1H), 1.76 – 1.63 (m, 1H), 1.61 – 1.50 (m, 1H), 1.42 – 1.26 (m, 18H), 0.88 (t,  $J = 6.7$  Hz, 3H).  $^{13}\text{C}$  NMR (100 MHz, Chloroform-*d*)  $\delta$  146.25, 146.24, 142.31, 128.50, 128.33, 128.00, 127.85, 127.80, 127.56, 105.63, 81.80, 58.73, 40.83, 35.03, 31.98, 30.00, 29.79, 29.76, 29.74, 29.72, 29.69, 29.42, 23.36, 22.75, 14.19. HRMS (DART) calcd for  $[\text{C}_{29}\text{H}_{40}\text{OI}]^+$  ( $[\text{M}+\text{H}]^+$ ): 531.2118, found: 531.2114.



# Preliminary mechanism study

## a) Radical trapping experiment

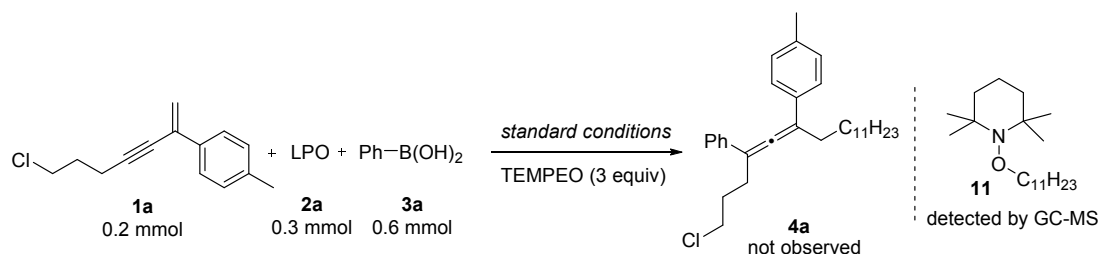

In a flame-dried Schlenk tube,  $\text{Cu}(\text{CH}_3\text{CN})_4\text{BF}_4$  (0.01 mmol, 5 mol %) and Py-Box ligand ( $\pm$ )-**L16** (0.014 mmol, 7 mol %) were dissolved in THF (1 mL) under a nitrogen atmosphere, and the mixture was stirred at room temperature for 30 minutes. Then 1,3-enyne (0.2 mmol, 1.0 equiv), peroxide (0.3 mmol, 1.5 equiv),  $\text{PhB}(\text{OH})_2$  (0.6 mmol, 3 equiv), DIPEA (0.6 mmol, 3 equiv) and TEMPO (3 mmol) were sequentially added. The reaction mixture was stirred at rt for 5 hours. The solution was filtrated with ethyl acetate on silica gel, and then detected by GC-MS. No desired coupling product was detected, but compound **11** was detected by GC-MS analysis.

## b) Radical clock experiments

Ring-opening reaction:

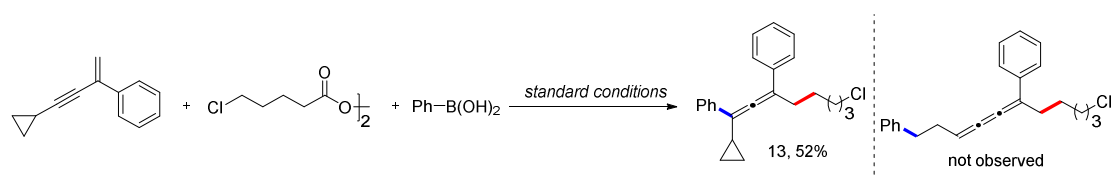

In a flame-dried Schlenk tube,  $\text{Cu}(\text{CH}_3\text{CN})_4\text{BF}_4$  (0.01 mmol, 5 mol %) and Py-Box ligand ( $\pm$ )-**L16** (0.014 mmol, 7 mol %) were dissolved in THF (1 mL) under a nitrogen atmosphere, and the mixture was stirred at room temperature for 30 minutes. Then 1,3-enyne **12** (0.2 mmol, 1.0 equiv), peroxide **2e** (0.3 mmol, 1.5 equiv),  $\text{PhB}(\text{OH})_2$  (0.6 mmol, 3 equiv) and DIPEA (0.6 mmol, 3 equiv) were sequentially added. The reaction mixture was stirred at rt for 5 hours. Upon completion of the reaction as monitored by TLC, the solvent was concentrated under vacuum. The crude residue was purified by flash column chromatography on silica gel to give the product **13** in

52% yield.

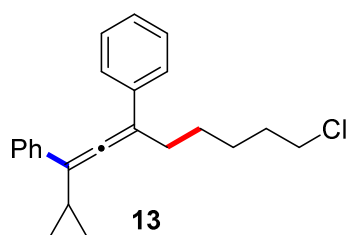

$^1\text{H}$  NMR (400 MHz, Chloroform-*d*)  $\delta$  7.60 (d,  $J$  = 7.7 Hz, 2H), 7.46 – 7.26 (m, 6H), 7.26 – 7.17 (m, 2H), 3.46 (t,  $J$  = 6.7 Hz, 2H), 2.55 (t,  $J$  = 6.8 Hz, 2H), 1.82 – 1.67 (m, 3H), 1.59 – 1.49 (m, 4H), 0.89 – 0.85 (m, 2H), 0.64 – 0.40 (m, 2H).  $^{13}\text{C}$  NMR (100 MHz, Chloroform-*d*)  $\delta$  204.22, 137.23, 136.54, 128.54, 128.44, 126.95, 126.93, 126.17, 125.80, 112.60, 110.03, 45.10, 32.56, 30.09, 27.28, 26.90, 11.33, 6.96, 6.90. HRMS (DART) calcd for  $[\text{C}_{23}\text{H}_{26}\text{Cl}]^+$  ( $[\text{M}+\text{H}]^+$ ): 337.1718, found: 337.1715.

### Ring closing reaction

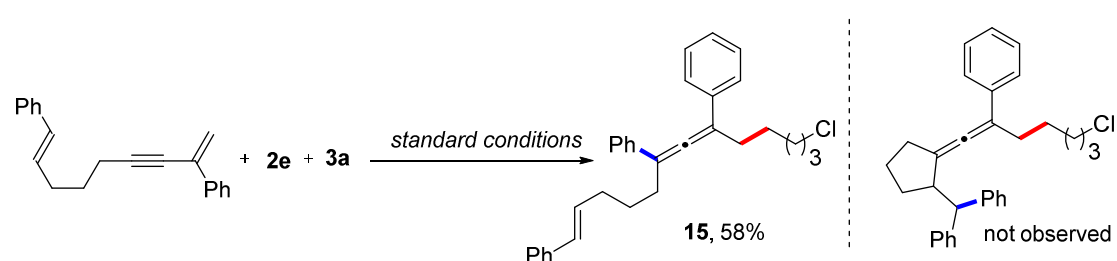

In a flame-dried Schlenk tube,  $\text{Cu}(\text{CH}_3\text{CN})_4\text{BF}_4$  (0.01 mmol, 5 mol %) and Py-Box ligand ( $\pm$ )-**L16** (0.014 mmol, 7 mol %) were dissolved in THF (1 mL) under a nitrogen atmosphere, and the mixture was stirred at room temperature for 30 minutes. Then 1,3-enyne **14** (0.2 mmol, 1.0 equiv), peroxide **2e** (0.3 mmol, 1.5 equiv),  $\text{PhB}(\text{OH})_2$  (0.6 mmol, 3 equiv) and DIPEA (0.6 mmol, 3 equiv) were sequentially added. The reaction mixture was stirred at rt for 5 hours. Upon completion of the reaction as monitored by TLC, the solvent was concentrated under vacuum. The crude residue was purified by flash column chromatography on silica gel to give the product **15** in 58% yield.

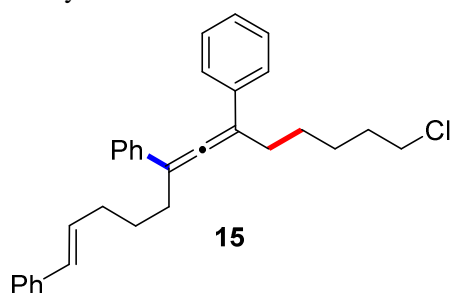

$^1\text{H}$  NMR (400 MHz, Chloroform-*d*)  $\delta$  7.52 – 7.41 (m, 4H), 7.34 – 7.15 (m, 11H), 6.32 (d,  $J$  = 15.9 Hz, 1H), 6.20 (dt,  $J$  = 15.8, 6.8 Hz, 1H), 3.43 (t,  $J$  = 6.7 Hz, 2H), 2.67 – 2.53 (m, 4H), 2.30 (q,  $J$  = 6.9 Hz, 2H), 1.82 – 1.69 (m, 4H), 1.65 – 1.47 (m, 4H).  $^{13}\text{C}$  NMR (100 MHz, Chloroform-*d*)  $\delta$  205.21, 137.78, 136.86, 136.82, 130.50, 130.33, 128.61, 128.58, 128.56, 126.95, 126.92, 126.01, 125.97, 109.21, 109.12, 45.16, 33.07, 32.61, 30.26, 29.90, 27.92, 27.45, 27.03. HRMS (DART) calcd for  $[\text{C}_{31}\text{H}_{34}\text{Cl}]^+$  ( $[\text{M}+\text{H}]^+$ ): 441.2344, found: 441.2340.

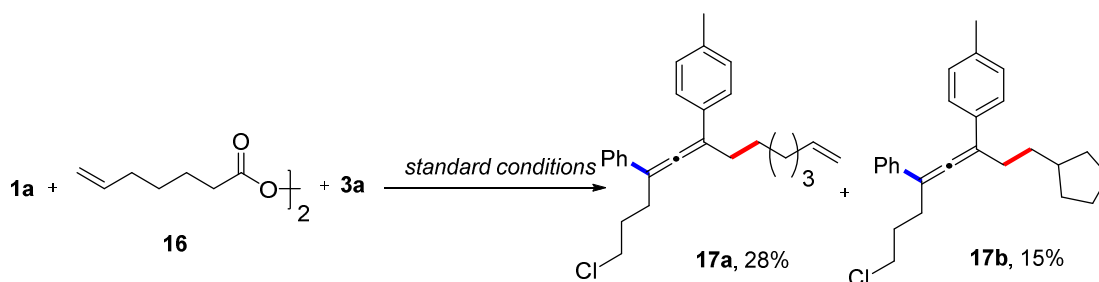

In a flame-dried Schlenk tube,  $\text{Cu}(\text{CH}_3\text{CN})_4\text{BF}_4$  (0.01 mmol, 5 mol %) and Py-Box ligand ( $\pm$ )-**L16** (0.014 mmol, 7 mol %) were dissolved in THF (1 mL) under a nitrogen atmosphere, and the mixture was stirred at room temperature for 30 minutes. Then 1,3-enyne **1a** (0.2 mmol, 1.0 equiv), peroxide **16** (0.3 mmol, 1.5 equiv),  $\text{PhB}(\text{OH})_2$  (0.6 mmol, 3 equiv) and DIPEA (0.6 mmol, 3 equiv) were sequentially added. The reaction mixture was stirred at rt for 5 hours. Upon completion of the reaction as monitored by TLC, the solvent was concentrated under vacuum. The crude residue was purified by flash column chromatography on silica gel to give the products **17a** and **17b** in 28% and 15% yields.

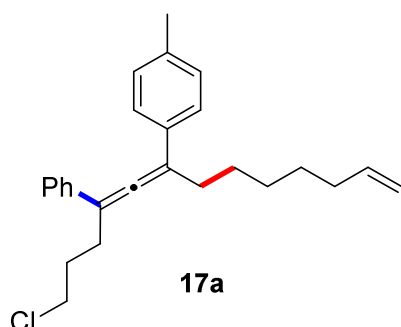

$^1\text{H}$  NMR (400 MHz, Chloroform-*d*)  $\delta$  7.46 – 7.41 (m, 2H), 7.35 – 7.28 (m, 4H), 7.24 – 7.19 (m, 1H), 7.13 (d,  $J = 8.0$  Hz, 2H), 5.85 – 5.68 (m, 1H), 5.02 – 4.85 (m, 2H), 3.61 (t,  $J = 6.4$  Hz, 2H), 2.70 (t,  $J = 7.4$  Hz, 2H), 2.53 (t,  $J = 7.6$  Hz, 2H), 2.33 (s, 3H), 2.11 – 1.96 (m, 4H), 1.62 – 1.56 (m, 2H), 1.45 – 1.36 (m, 4H).  $^{13}\text{C}$  NMR (100 MHz, Chloroform-*d*)  $\delta$  204.66, 139.07, 136.73, 136.64, 133.53, 129.28, 128.54, 126.87, 125.83, 114.29, 109.84, 107.74, 44.98, 33.82, 30.98, 30.42, 29.23, 28.81, 28.01, 27.53, 21.13. HRMS (EI+) calcd for  $[\text{C}_{26}\text{H}_{31}\text{Cl}]^+$  ( $[\text{M}]^+$ ): 378.2114, found: 378.2108.

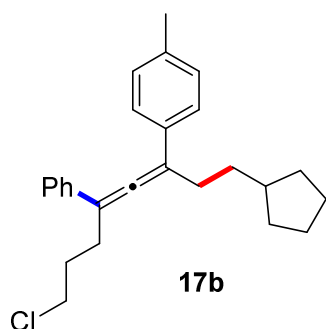

$^1\text{H}$  NMR (400 MHz, Chloroform-*d*)  $\delta$  7.48 – 7.39 (m, 2H), 7.37 – 7.26 (m, 4H), 7.21 (t,  $J = 7.2$  Hz, 1H), 7.13 (d,  $J = 8.0$  Hz, 2H), 3.61 (t,  $J = 6.4$  Hz, 2H), 2.71 (t,  $J = 7.5$  Hz, 2H), 2.60 – 2.44 (m, 2H), 2.33 (s, 3H), 2.11 – 1.99 (m, 2H), 1.90 – 1.70 (m, 3H), 1.58 (td,  $J = 11.4, 10.3, 3.3$  Hz, 4H),

1.53 – 1.40 (m, 2H), 1.17 – 1.03 (m, 2H).  $^{13}\text{C}$  NMR (100 MHz, Chloroform-*d*)  $\delta$  204.65, 136.70, 133.56, 129.27, 128.52, 126.83, 125.84, 125.82, 110.02, 107.60, 44.99, 40.21, 34.58, 32.73, 32.67, 30.97, 29.74, 27.51, 25.20, 21.13. HRMS (EI<sup>+</sup>) calcd for  $[\text{C}_{26}\text{H}_{31}\text{Cl}]^+$  ( $[\text{M}]^+$ ): 378.2114, found: 378.2110.

### c) Radical dimerization

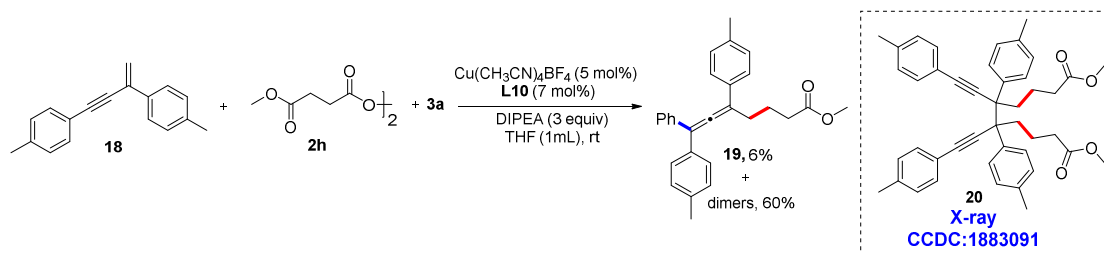

In a flame-dried Schlenk tube,  $\text{Cu}(\text{CH}_3\text{CN})_4\text{BF}_4$  (0.01 mmol, 5 mol%) and Py-Box ligand **L10** (0.014 mmol, 7 mol%) were dissolved in THF (1 mL) under a nitrogen atmosphere, and the mixture was stirred at room temperature for 30 minutes. Then 1,3-enyne **18** (0.2 mmol, 1.0 equiv), peroxide **2h** (0.3 mmol, 1.5 equiv),  $\text{PhB}(\text{OH})_2$  (0.6 mmol, 3 equiv) and DIPEA (0.6 mmol, 3 equiv) were sequentially added. The reaction mixture was stirred at rt for 5 h. Upon completion of the reaction as monitored by TLC, the solvent was concentrated under vacuum. The crude residue was purified by flash column chromatography on silica gel to give the products **19** in 28% yields, and a mixture of homocoupling dimers in 60% yield.

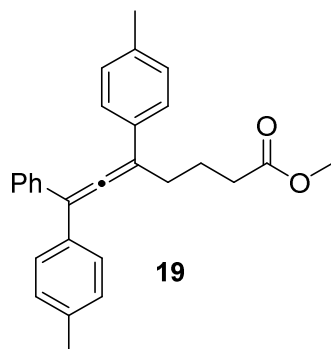

$^1\text{H}$  NMR (400 MHz, Chloroform-*d*)  $\delta$  7.35 – 7.27 (m, 4H), 7.29 – 7.15 (m, 6H), 7.06 (dd,  $J = 8.1, 4.1$  Hz, 4H), 3.55 (s, 3H), 2.57 (t,  $J = 7.6$  Hz, 2H), 2.34 – 2.21 (m, 8H), 2.02 – 1.83 (m, 2H).  $^{13}\text{C}$  NMR (100 MHz, Chloroform-*d*)  $\delta$  206.46, 173.96, 137.10, 137.03, 136.93, 133.84, 132.97, 129.35, 129.19, 128.43, 128.32, 128.22, 127.25, 125.92, 113.07, 108.06, 51.55, 33.70, 29.83, 23.27, 21.23, 21.16. HRMS (ESI) calcd for  $[\text{C}_{28}\text{H}_{28}\text{O}_2\text{Na}]^+$  ( $[\text{M}+\text{Na}]^+$ ): 419.1982, found: 419.1981.

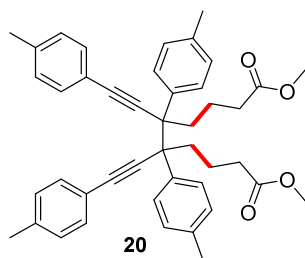

$^1\text{H}$  NMR (400 MHz, Chloroform-*d*)  $\delta$  7.62 (d,  $J$  = 7.8 Hz, 4H), 7.36 (d,  $J$  = 7.9 Hz, 4H), 7.14 (t,  $J$  = 8.9 Hz, 8H), 3.54 (s, 6H), 2.60 – 2.44 (m, 2H), 2.37 (s, 6H), 2.36 (s, 6H), 2.24 – 2.14 (m, 4H), 1.65 – 1.57 (m, 4H), 1.43 – 1.32 (m, 2H).  $^{13}\text{C}$  NMR (100 MHz, Chloroform-*d*)  $\delta$  173.99, 137.97, 136.52, 136.00, 131.32, 129.08, 127.80, 120.65, 91.79, 87.88, 54.69, 51.36, 35.65, 34.31, 21.52, 21.12, 21.07. HRMS (ESI) calcd for  $[\text{C}_{44}\text{H}_{46}\text{O}_4\text{Na}]^+$  ( $[\text{M}+\text{Na}]^+$ ): 661.3288, found: 661.3289.

## Single crystal data of 20

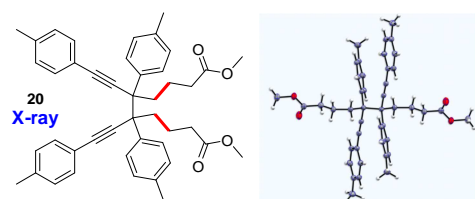

Table S2. Crystal data and structure refinement for data.

|                                   |                                             |                              |
|-----------------------------------|---------------------------------------------|------------------------------|
| Identification code               | Compound-20                                 |                              |
| Empirical formula                 | $\text{C}_{44}\text{H}_{46}\text{O}_4$      |                              |
| Formula weight                    | 638.81                                      |                              |
| Temperature                       | 99.99(10) K                                 |                              |
| Wavelength                        | 1.3405 Å                                    |                              |
| Crystal system                    | Triclinic                                   |                              |
| Space group                       | P -1                                        |                              |
| Unit cell dimensions              | $a = 10.8484(4)$ Å                          | $\alpha = 76.980(4)^\circ$ . |
|                                   | $b = 11.0591(5)$ Å                          | $\beta = 84.293(3)^\circ$ .  |
|                                   | $c = 15.2489(6)$ Å                          | $\gamma = 86.909(3)^\circ$ . |
| Volume                            | $1772.66(13)$ Å <sup>3</sup>                |                              |
| Z                                 | 2                                           |                              |
| Density (calculated)              | 1.197 Mg/m <sup>3</sup>                     |                              |
| Absorption coefficient            | 0.374 mm <sup>-1</sup>                      |                              |
| F(000)                            | 684                                         |                              |
| Crystal size                      | 0.15 x 0.08 x 0.07 mm <sup>3</sup>          |                              |
| Theta range for data collection   | 2.596 to 60.549°.                           |                              |
| Index ranges                      | -13 ≤ h ≤ 14, -14 ≤ k ≤ 14, -18 ≤ l ≤ 19    |                              |
| Reflections collected             | 24617                                       |                              |
| Independent reflections           | 7932 [R(int) = 0.0281]                      |                              |
| Completeness to theta = 53.543°   | 99.9 %                                      |                              |
| Absorption correction             | Semi-empirical from equivalents             |                              |
| Max. and min. transmission        | 1.00000 and 0.81422                         |                              |
| Refinement method                 | Full-matrix least-squares on F <sup>2</sup> |                              |
| Data / restraints / parameters    | 7932 / 0 / 439                              |                              |
| Goodness-of-fit on F <sup>2</sup> | 1.085                                       |                              |

|                               |                                    |
|-------------------------------|------------------------------------|
| Final R indices [I>2sigma(I)] | R1 = 0.0449, wR2 = 0.1234          |
| R indices (all data)          | R1 = 0.0516, wR2 = 0.1283          |
| Extinction coefficient        | n/a                                |
| Largest diff. peak and hole   | 0.401 and -0.291 e.Å <sup>-3</sup> |

## Reference

1. X.-R. Song, Y.-P. Han, Y.-F. Qiu, Z.-H. Qiu, X.-Y. Liu, P.-F. Xu, Y.-M. Liang, *Chem. Eur. J.* 2014, **20**, 12046.
2. M. Wakayama, H. Nemoto, M. Shibuya, *Tetrahedron Lett.* 1996, **37**, 5397.
3. X. Zhu, W. Deng, M. F. Chiou, C. Ye, W. Jian, Y. Zeng, Y. Jiao, L. Ge, Y. Li, X. Zhang and H. Bao, *J. Am. Chem. Soc.* 2019, **141**, 548.
4. W. Yan, X. Ye, N. G. Akhmedov, J. L. Petersen and X. Shi, *Org Lett.* 2012, **14**, 2358.
5. T. Chen, C. Guo, M. Goto and L. B. Han, *Chem. Commun.* 2013, **49**, 7498.
6. C. Ye, B. Qian, Y. Li, M. Su, D. Li and H. Bao, *Org. Lett.* 2018, **20**, 3202.
7. H. Zhou, L. Ge, J. Song, W. Jian, Y. Li, C. Li and H. Bao, *iScience*, 2018, **3**, 255.

# NMR spectra

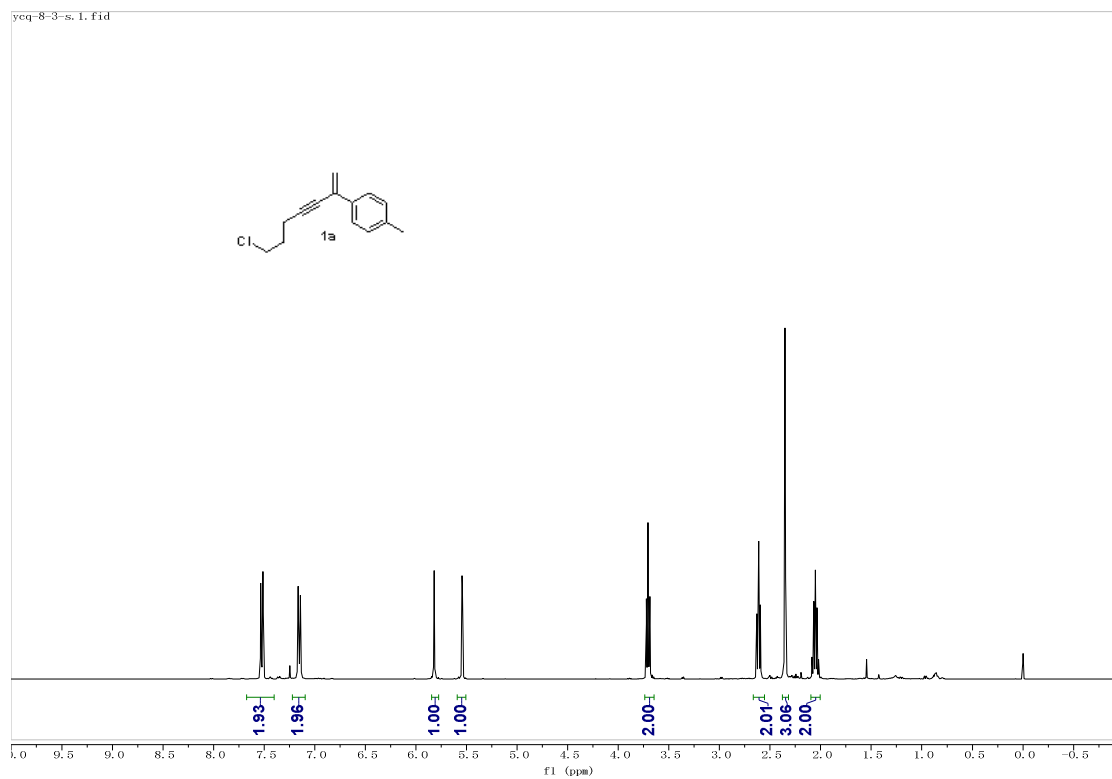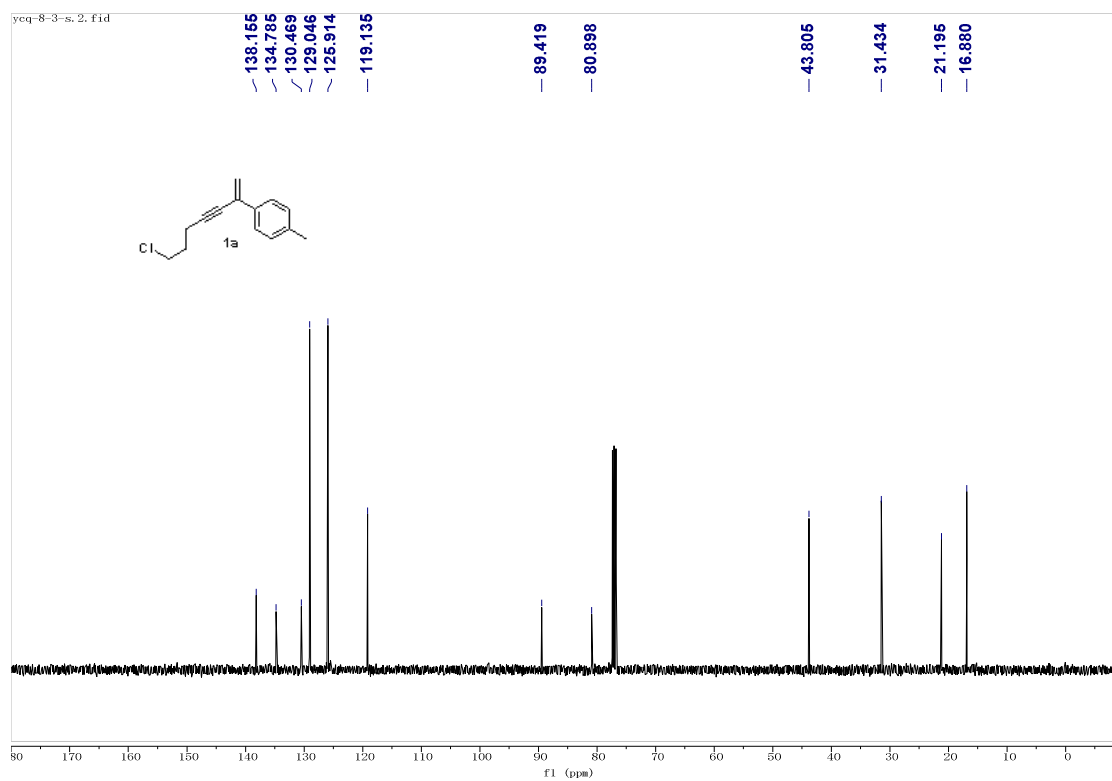

zyh-5-129. 1. f1d

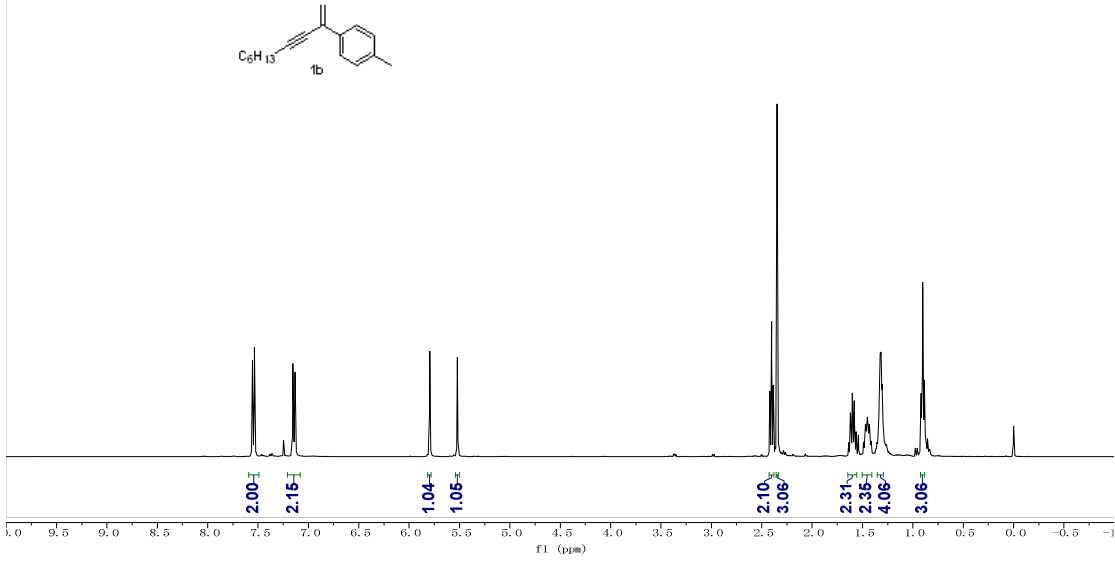

zyh-5-129. 2. f1d

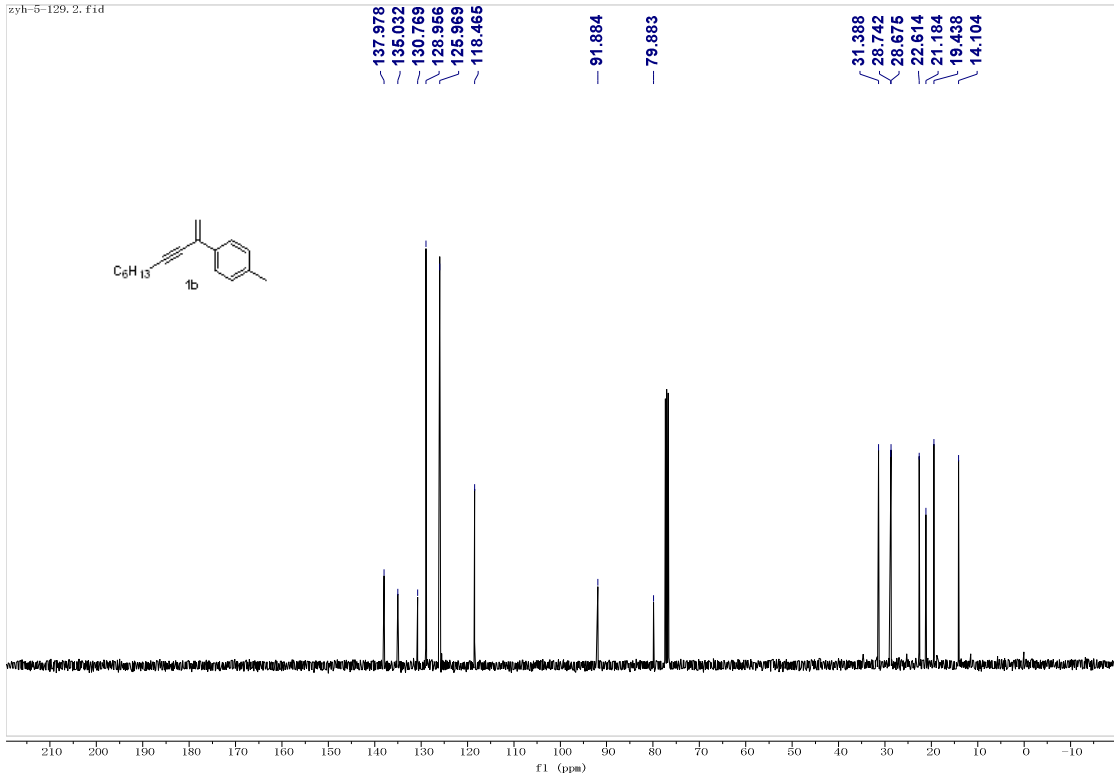



ZVH-4-62  
single\_pulse

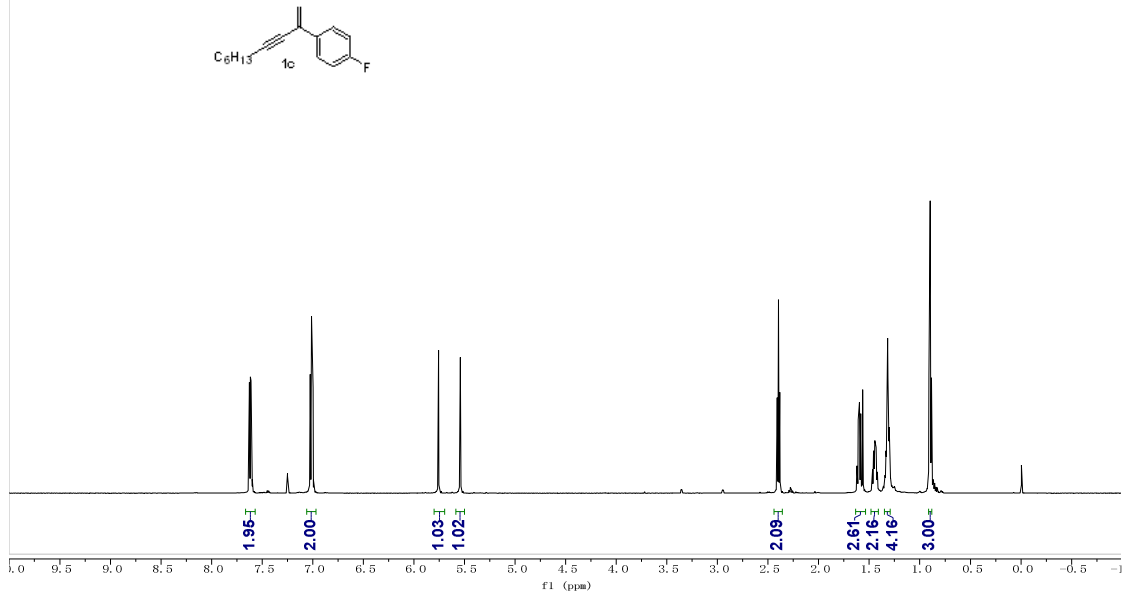

ZVH-4-62  
single pulse decoupled gated NOE

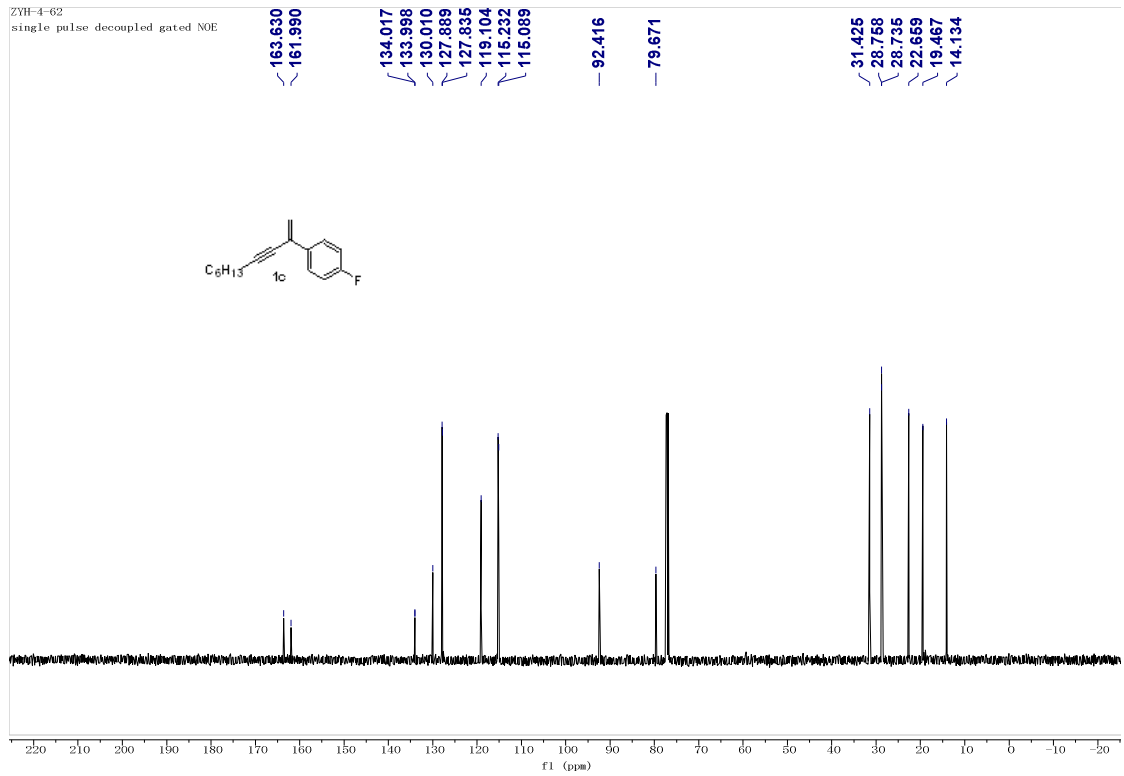

ycq-6-156-1  
single\_pulse

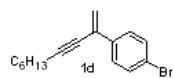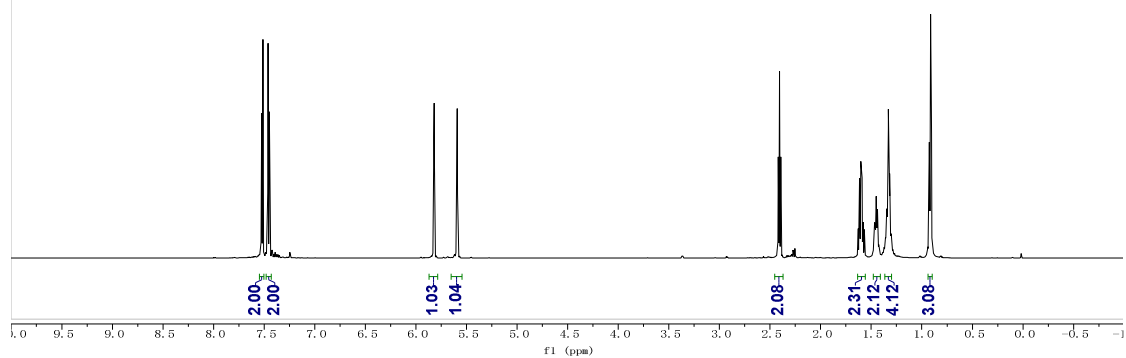

ycq-6-156-1  
single pulse decoupled gated NOE

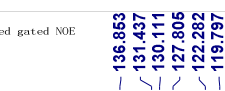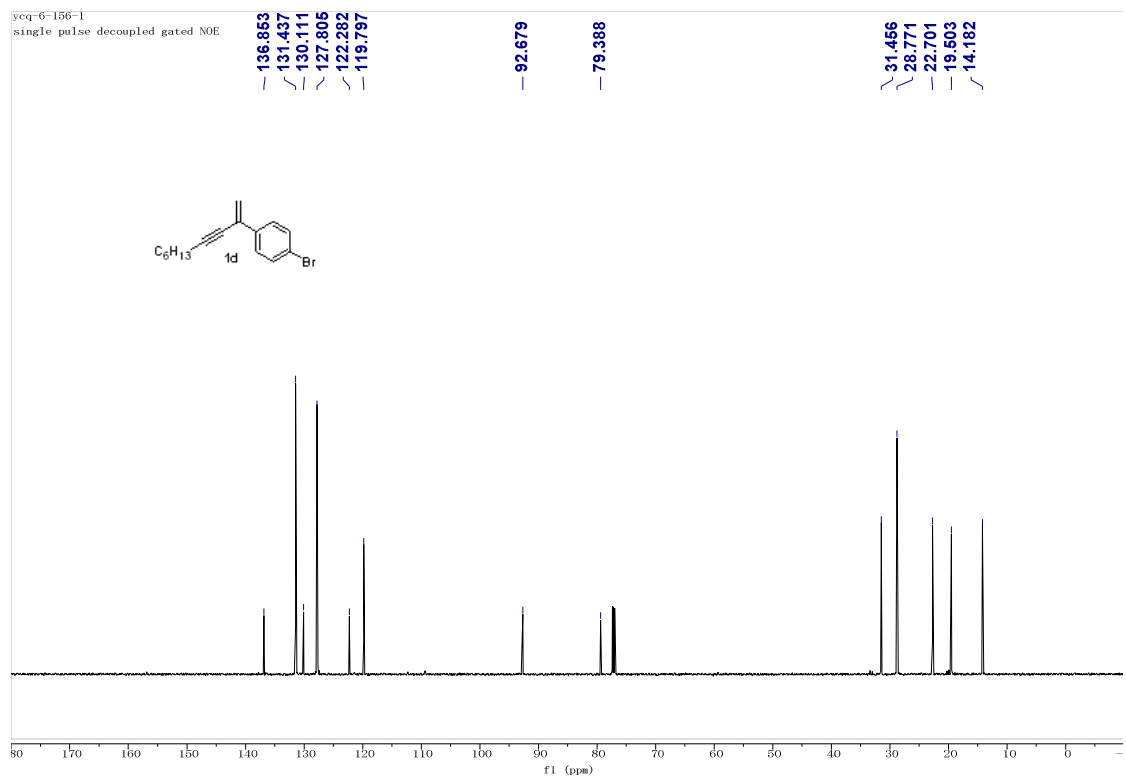

dw1-6-69.1.fid

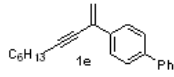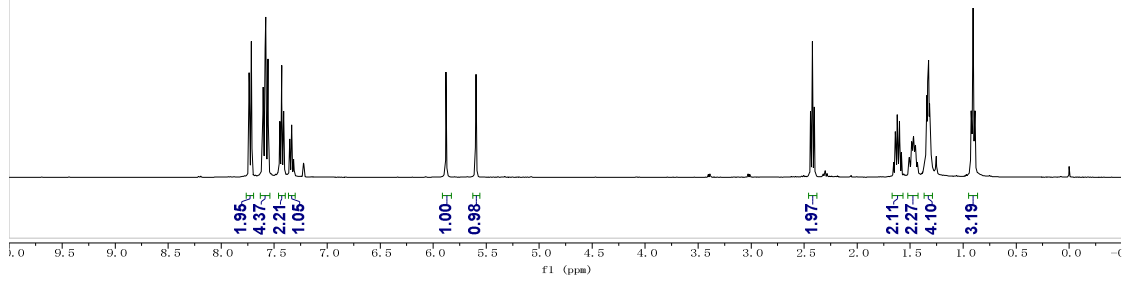

dw1-6-69.2.fid

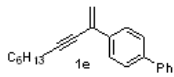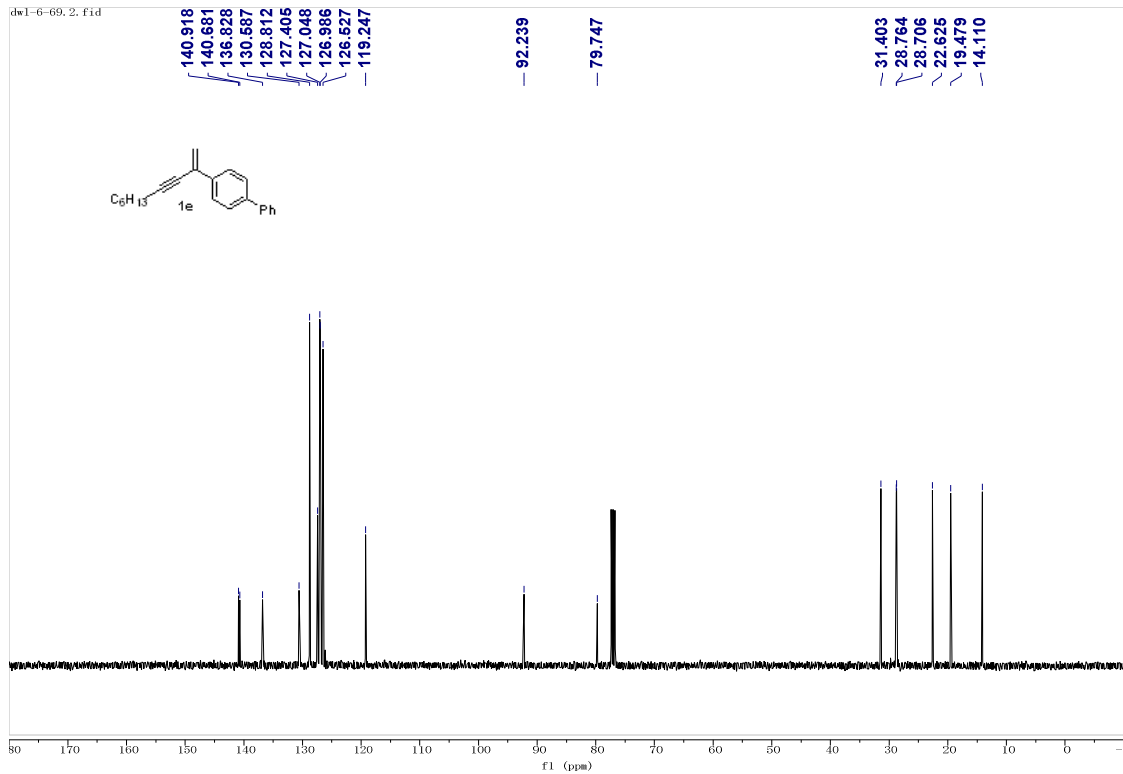

jwj-12-87.1.fid

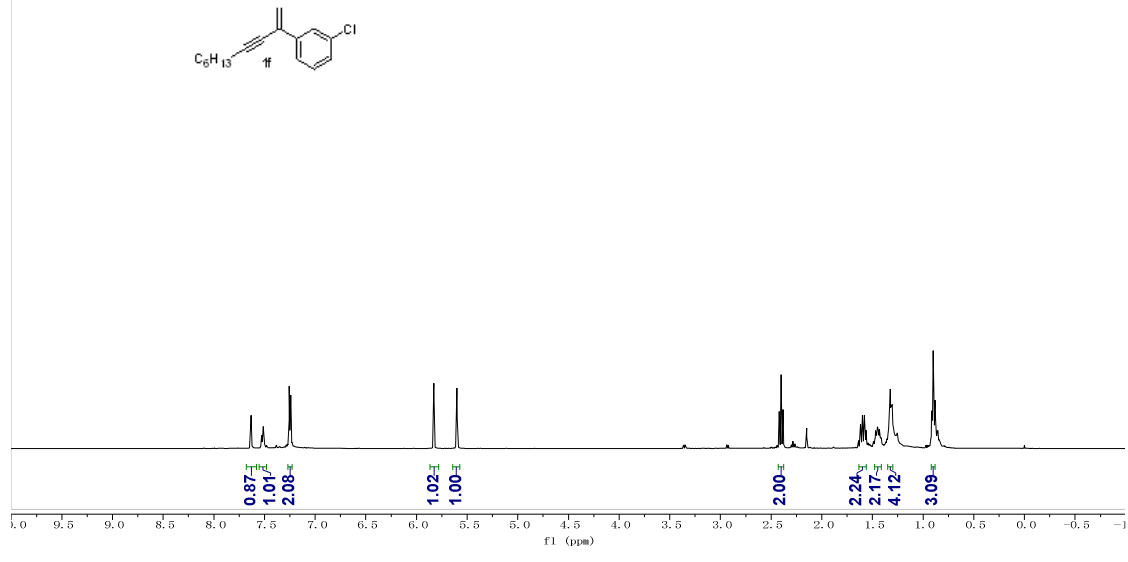

jwj-12-87.2.fid

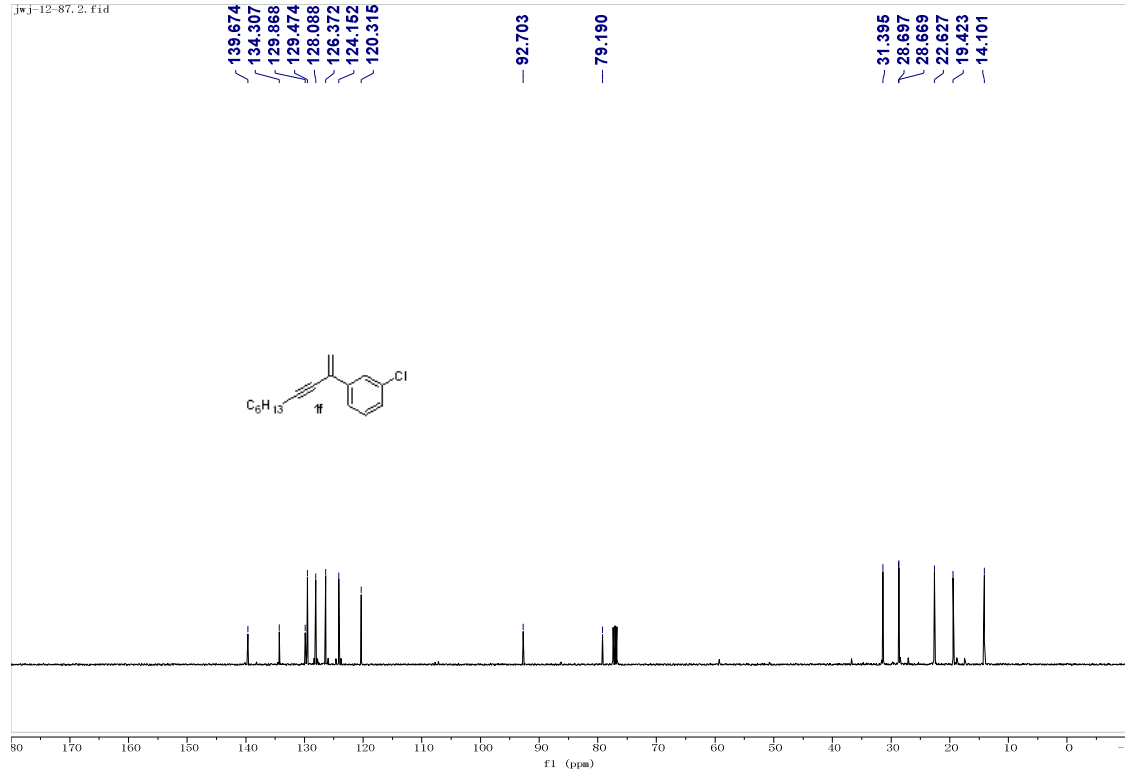

zyh-4-65  
single\_pulse

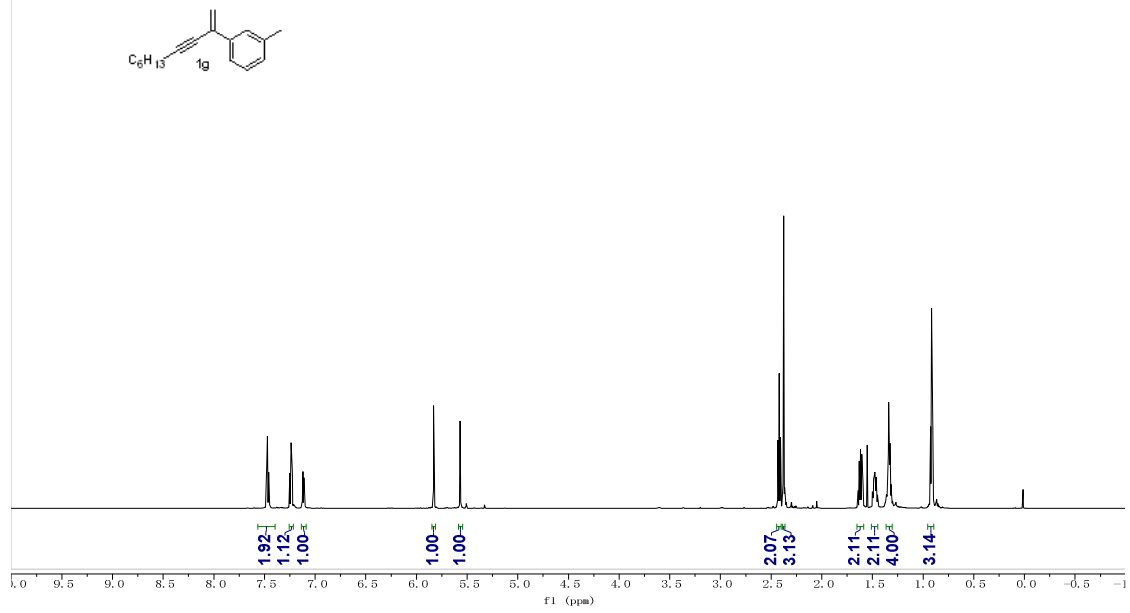

zyh-4-65  
single pulse decoupled gated NOE

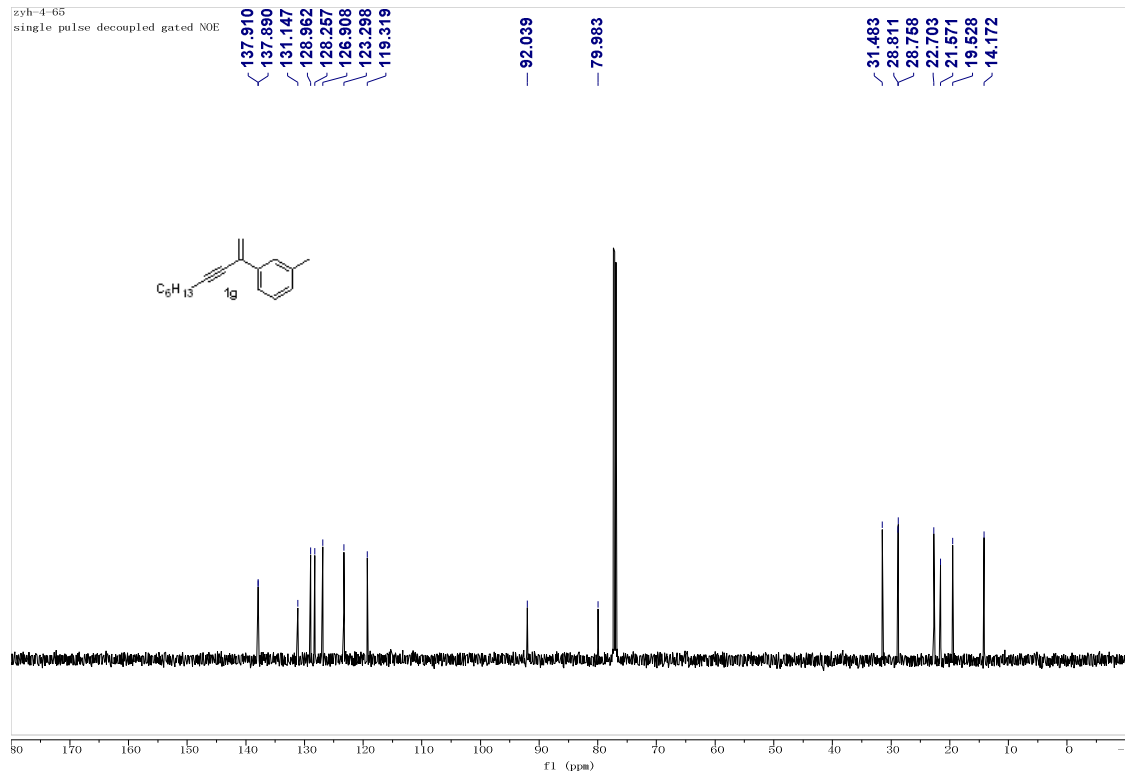

zyh-4-94  
single\_pulse

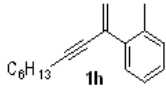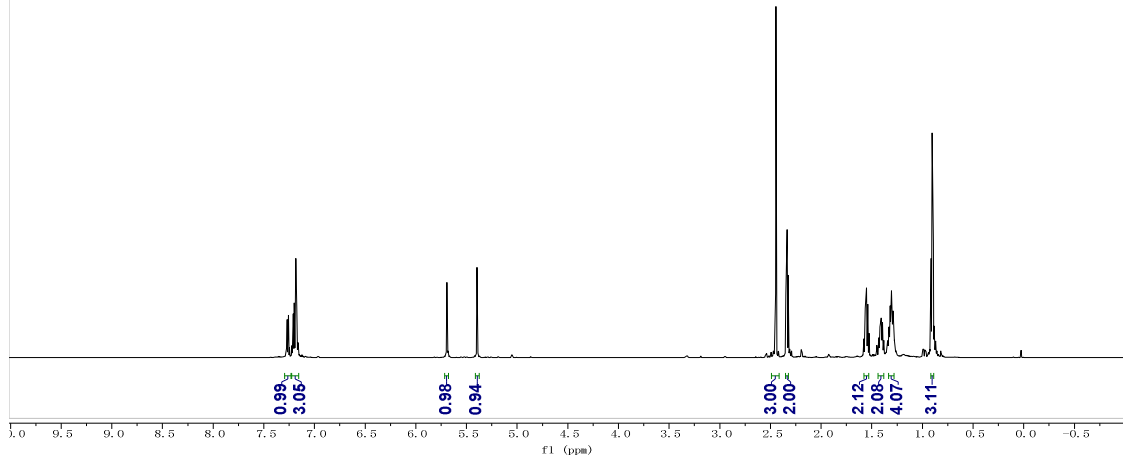

zyh-4-94  
single pulse decoupled gated NOE

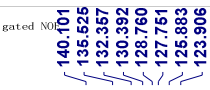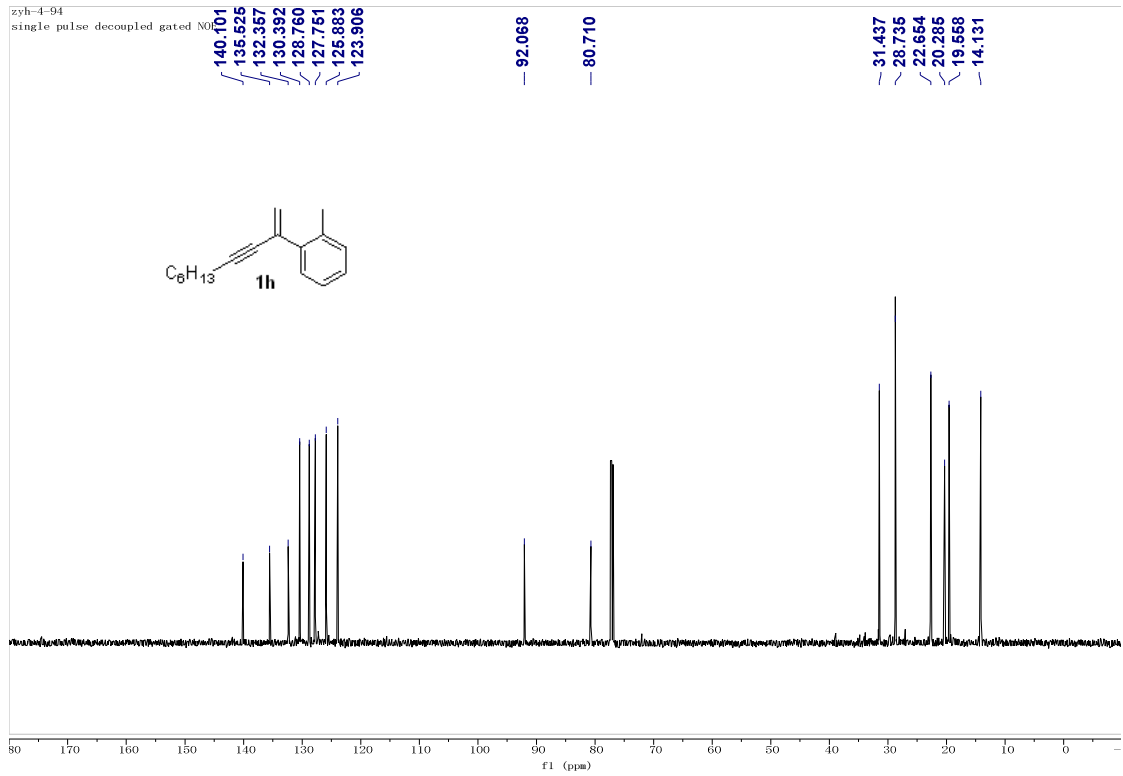

zxt-7-130.1.fid

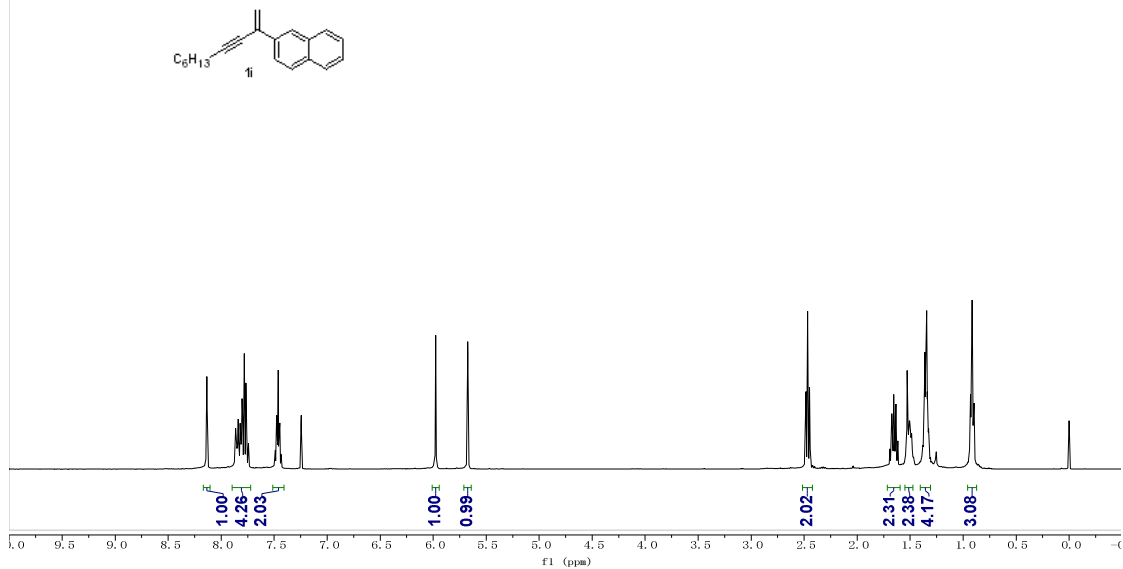

zxt-7-130.2.fid

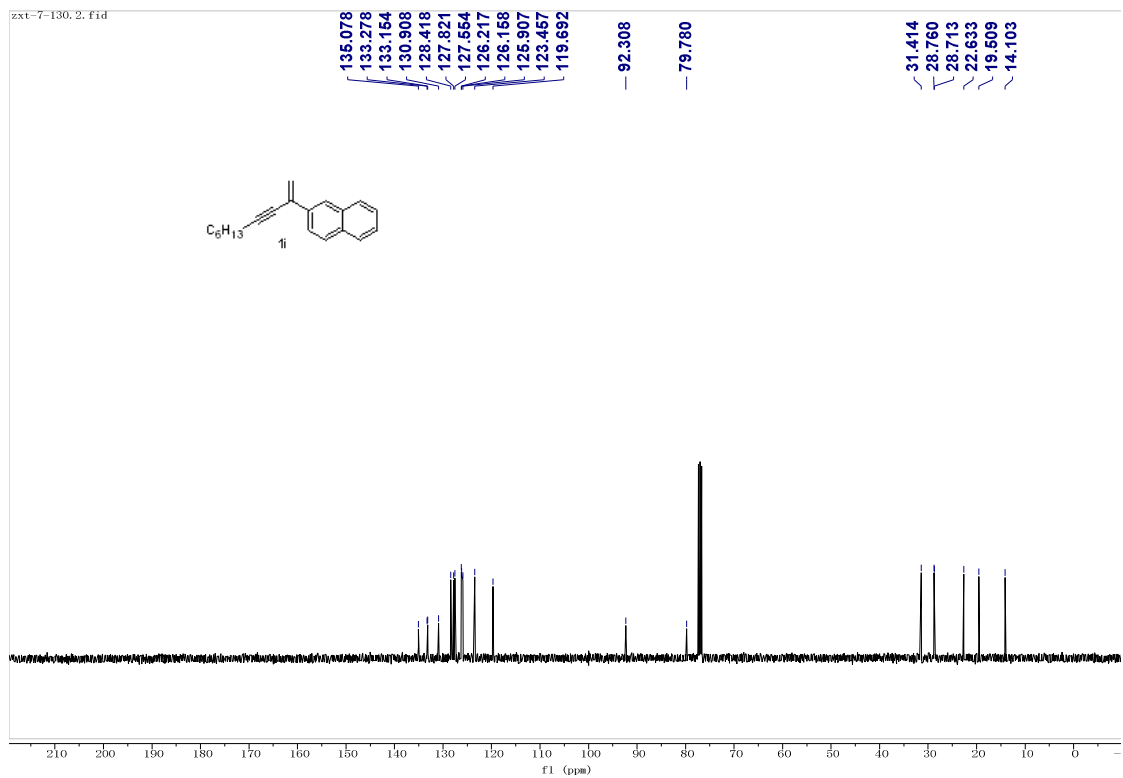

zyh-4-139  
single\_pulse

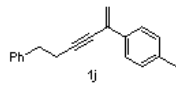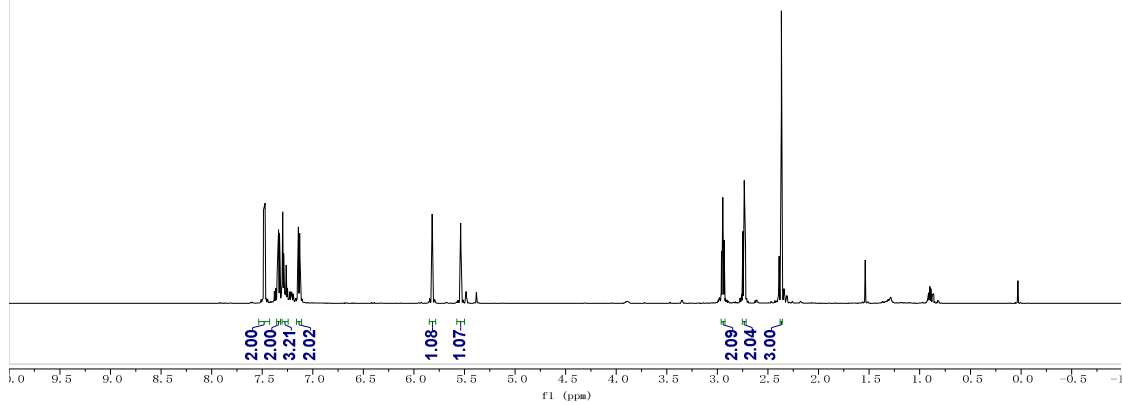

zyh-4-139  
single pulse decoupled gat

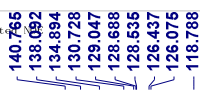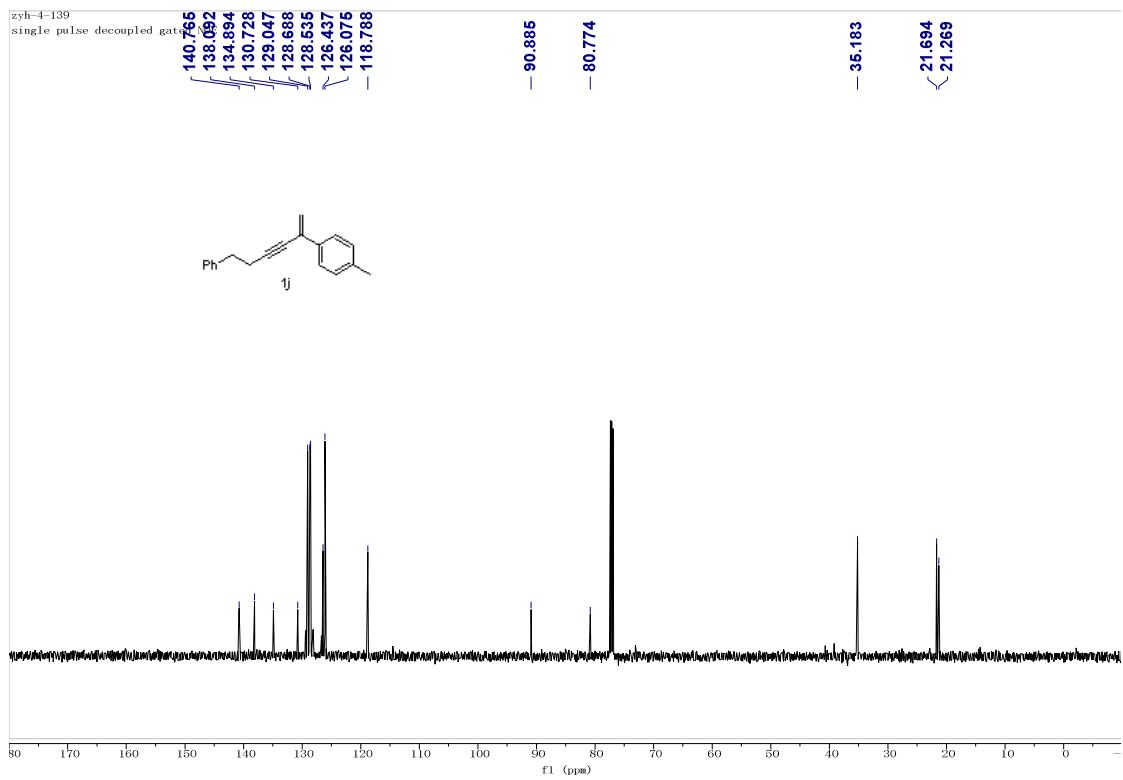



zyh-4-240.1.fid

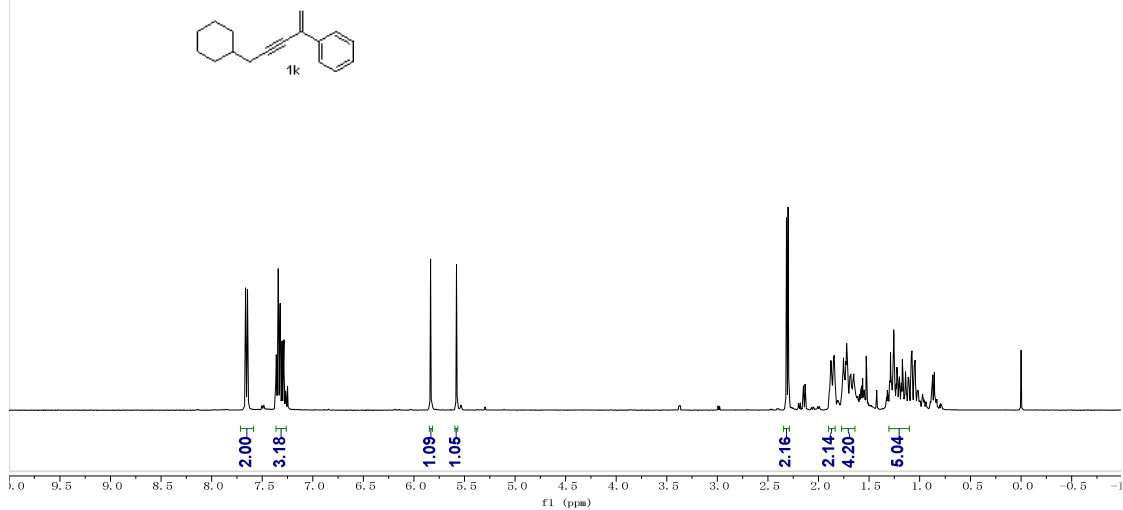

zyh-4-240.2.fid

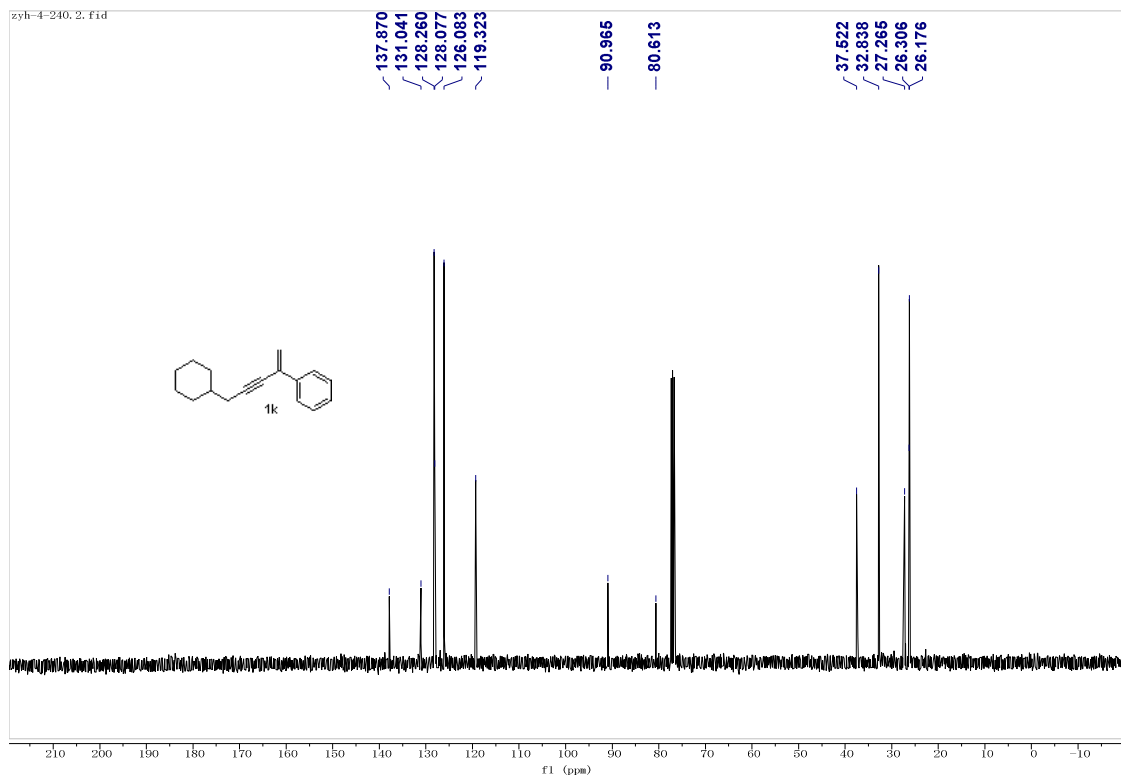

JWJ-12-127  
single\_pulse

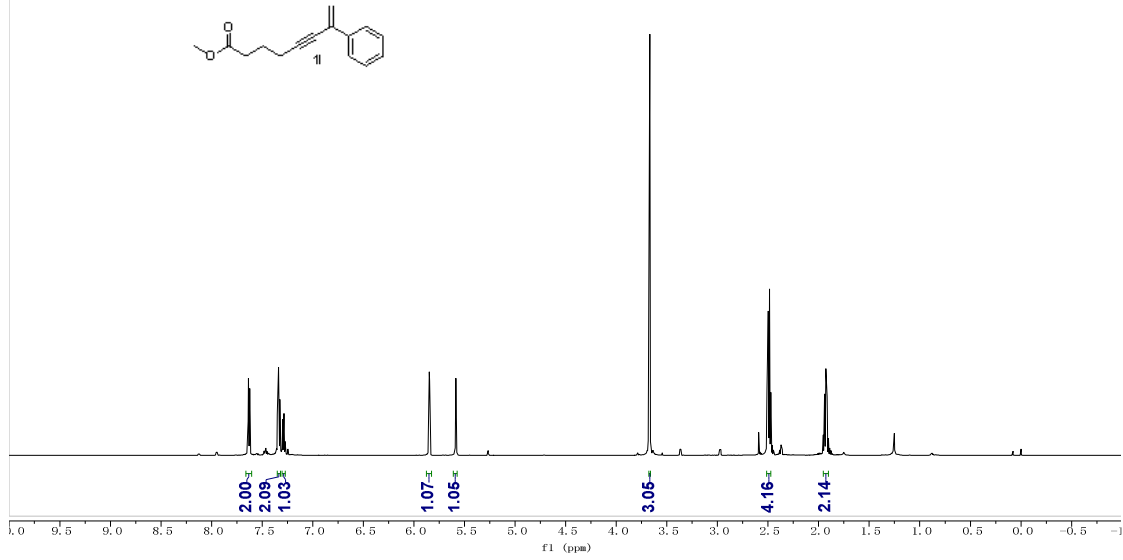

JWJ-12-127  
single pulse decoupled gated NOE

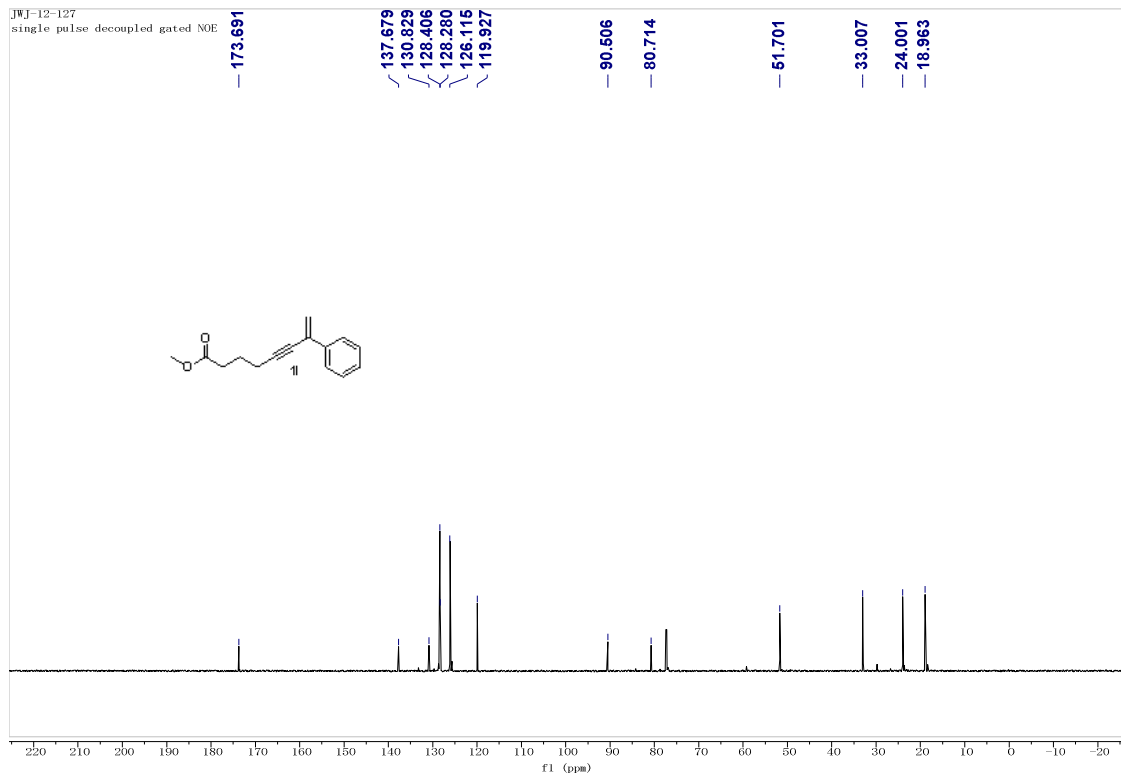

yeq-7-94-2.1.fid

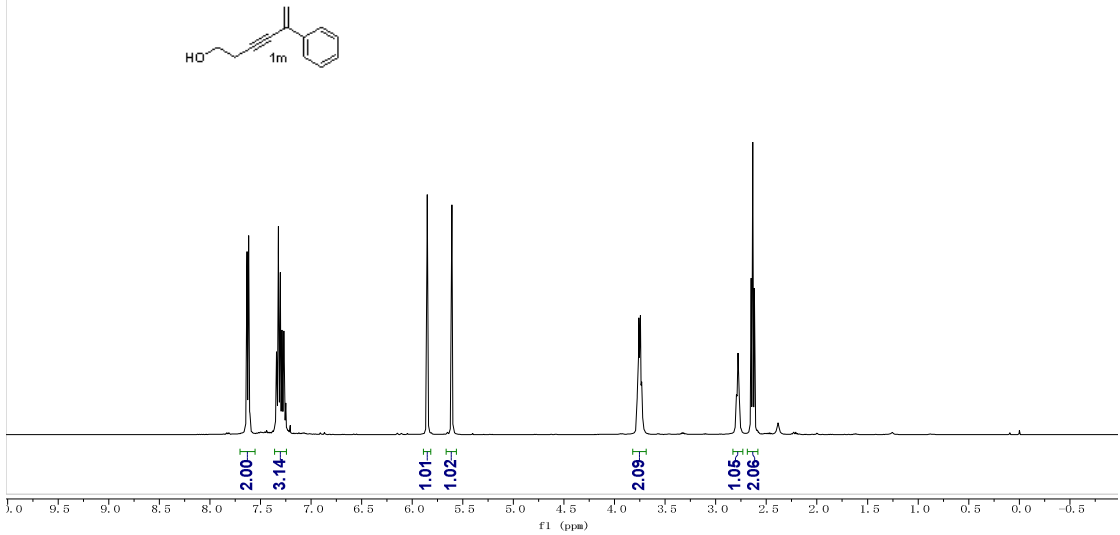

yeq-7-94-2.2.fid

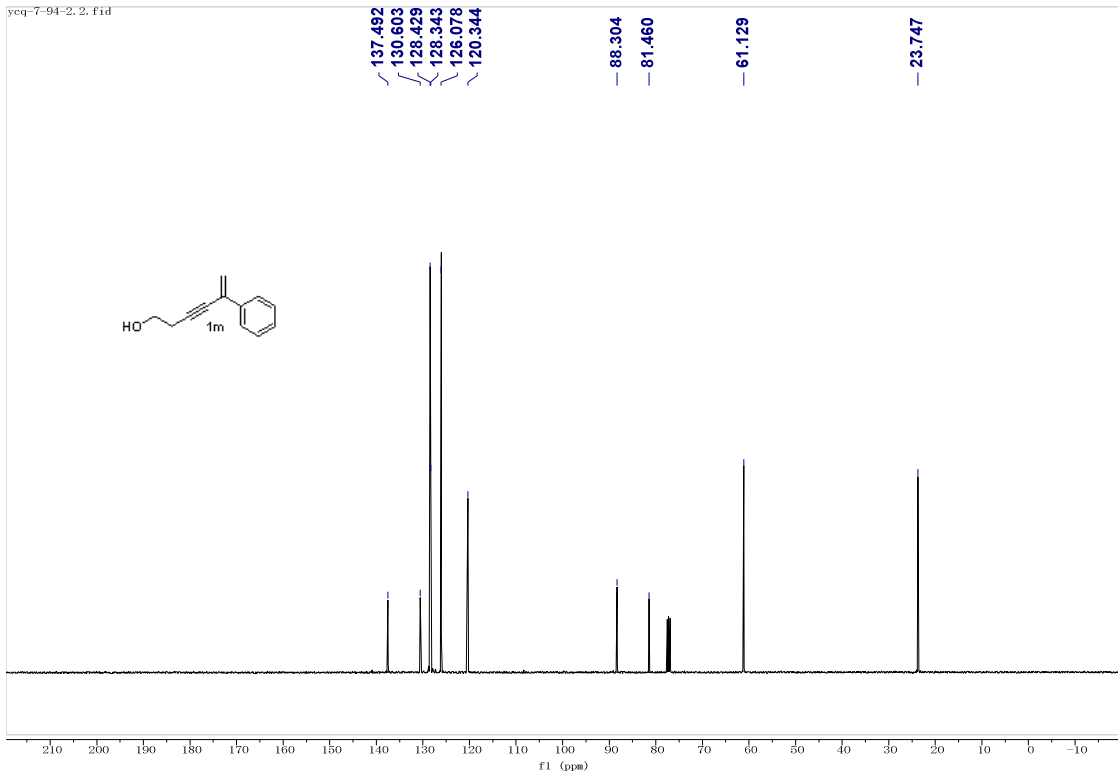

xhg-9-112.1.fid

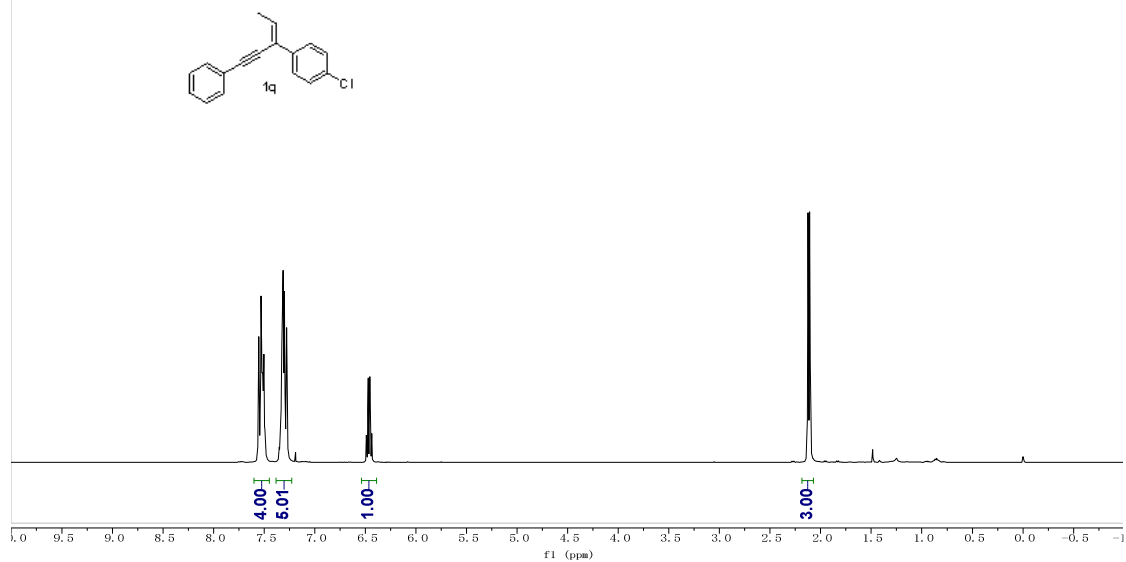

xhg-9-112.2.fid

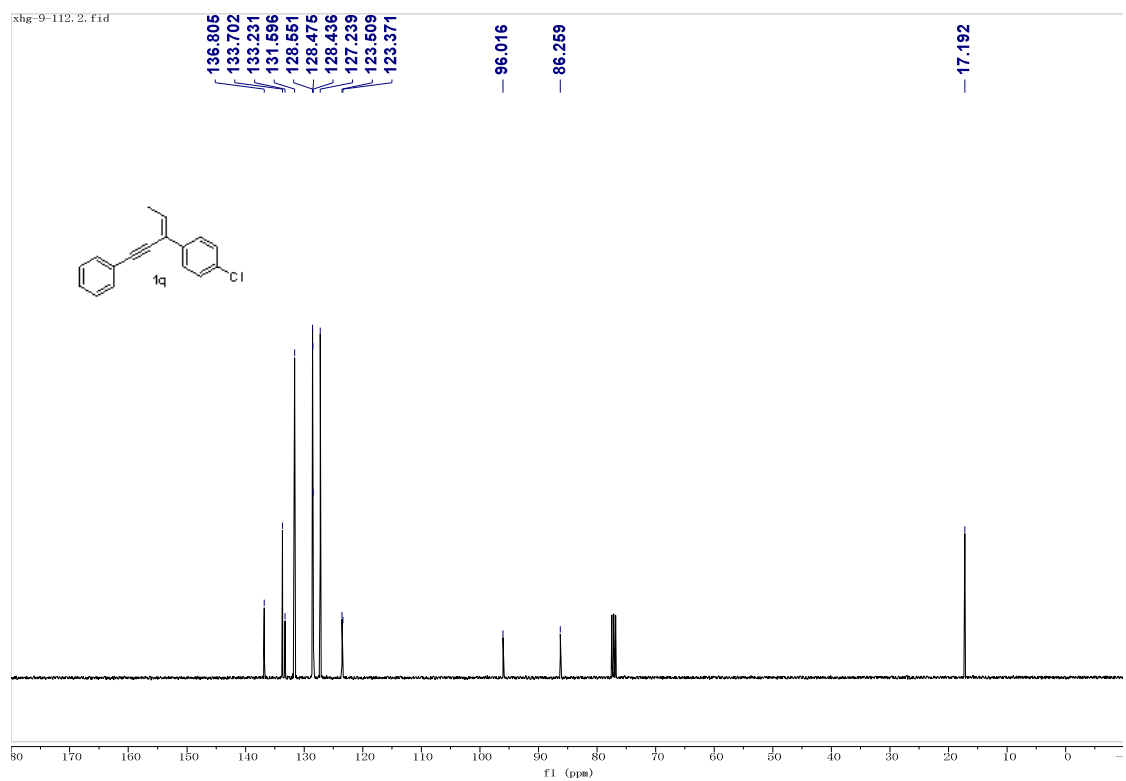

dw1-4-145-2. 1. F1d

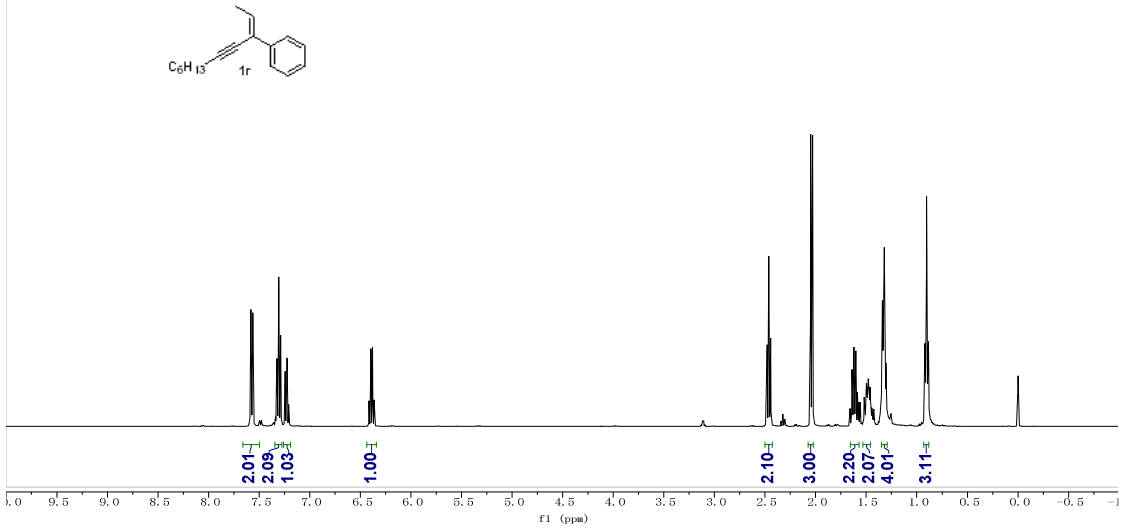

dw1-4-145-2C. 1. F1d

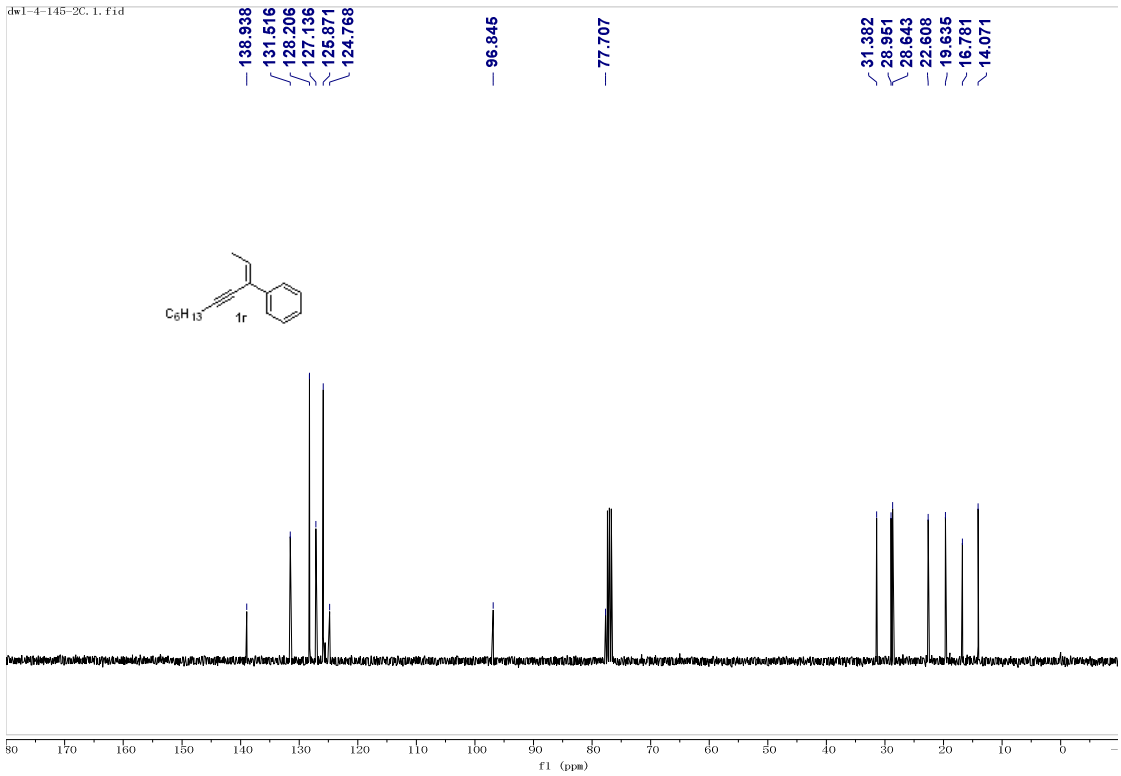

zxt-7-76-1ch. 1. fid

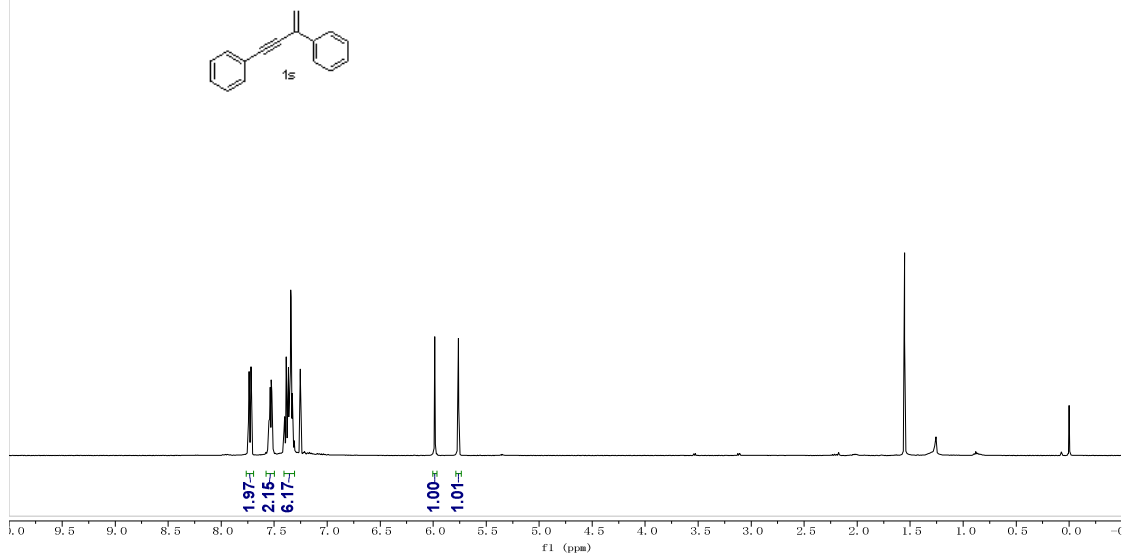

zxt-7-76-1ch. 2. fid

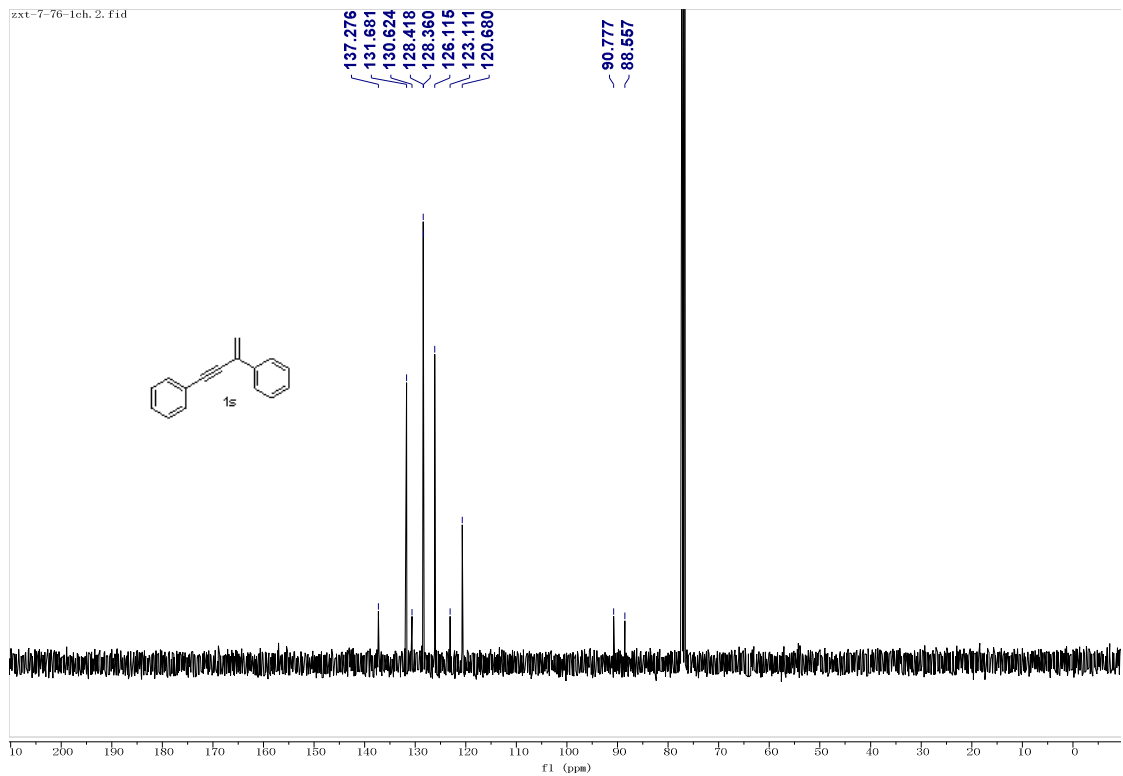

jwj-12-75.1.fid

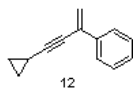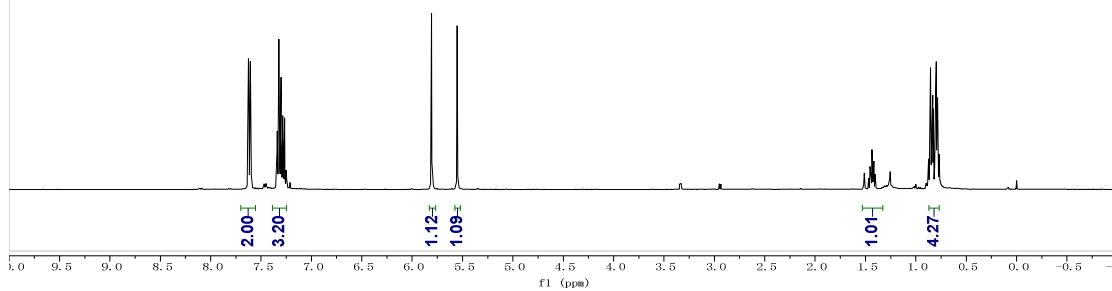

jwj-12-75.2.fid

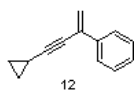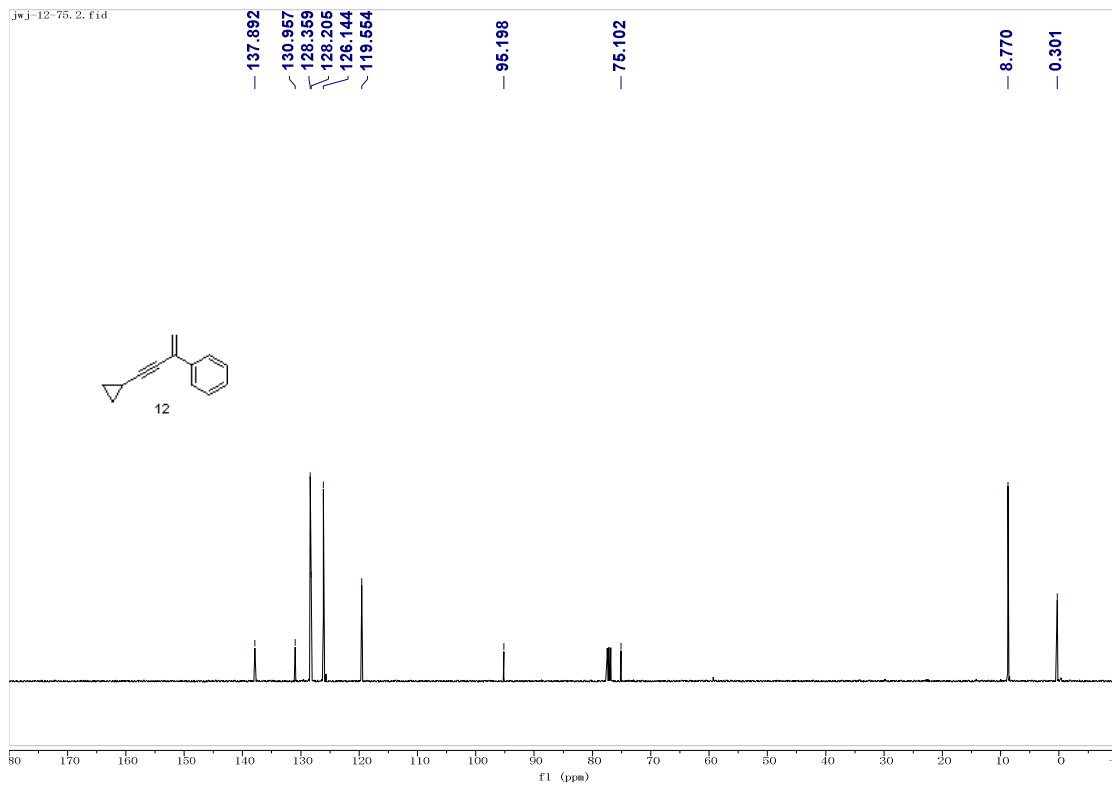

yeq-7-146-1.1.fid

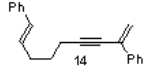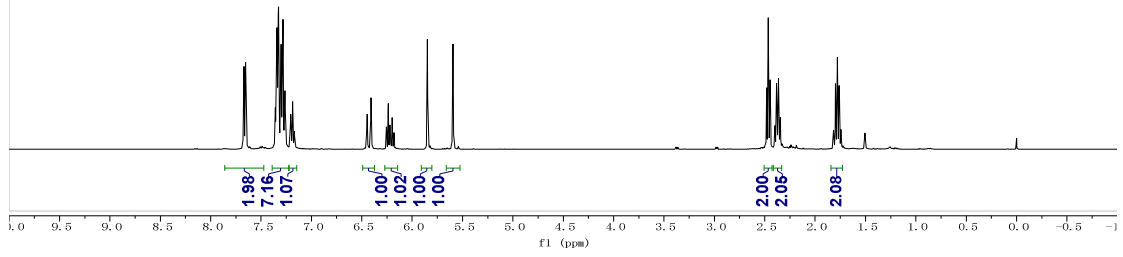

yeq-7-146-1.2.fid

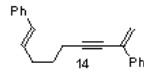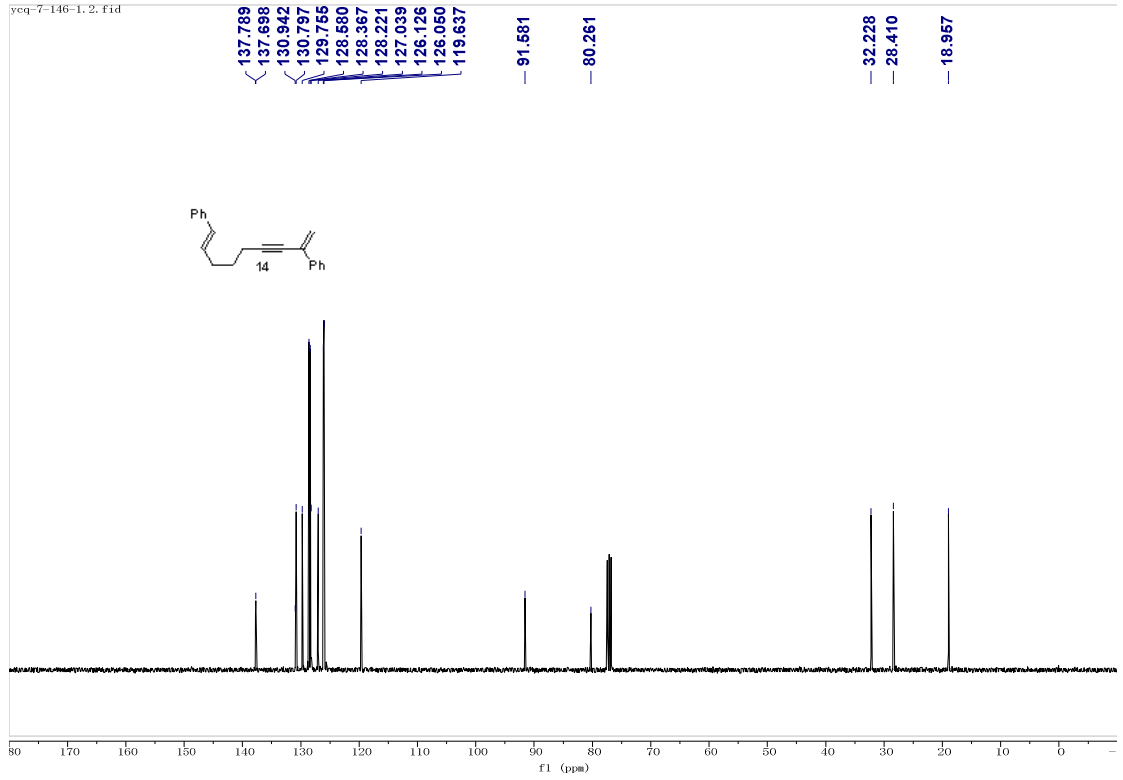



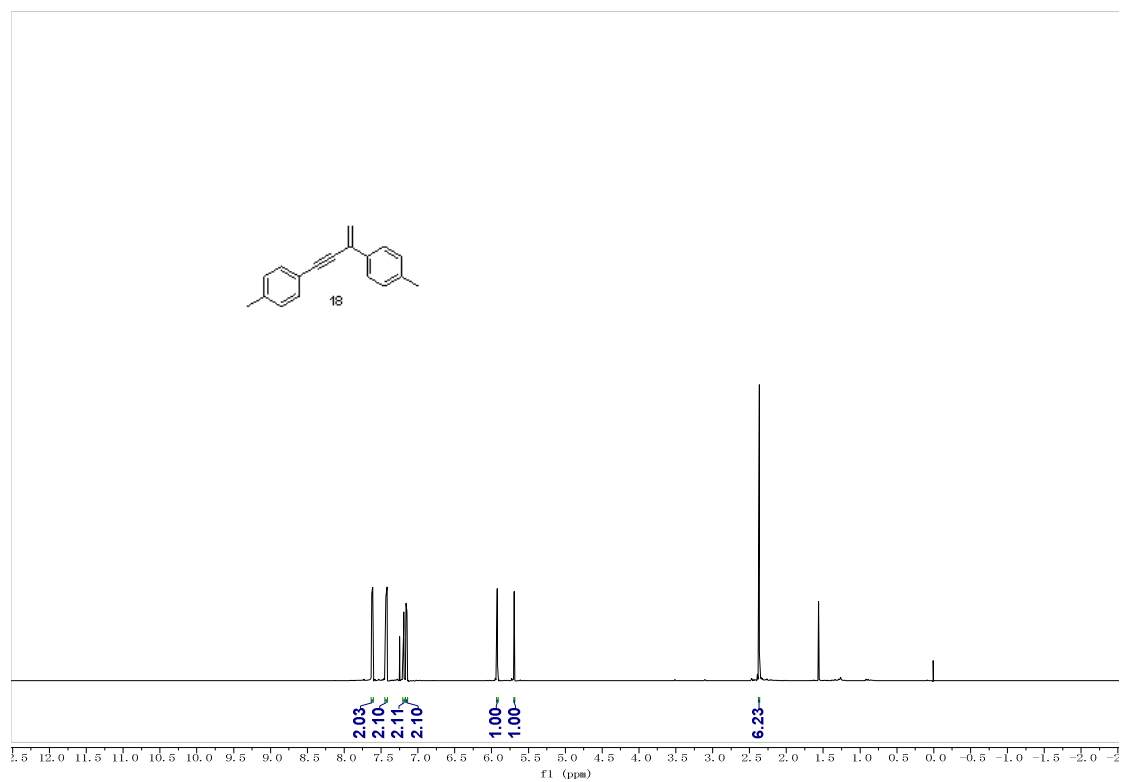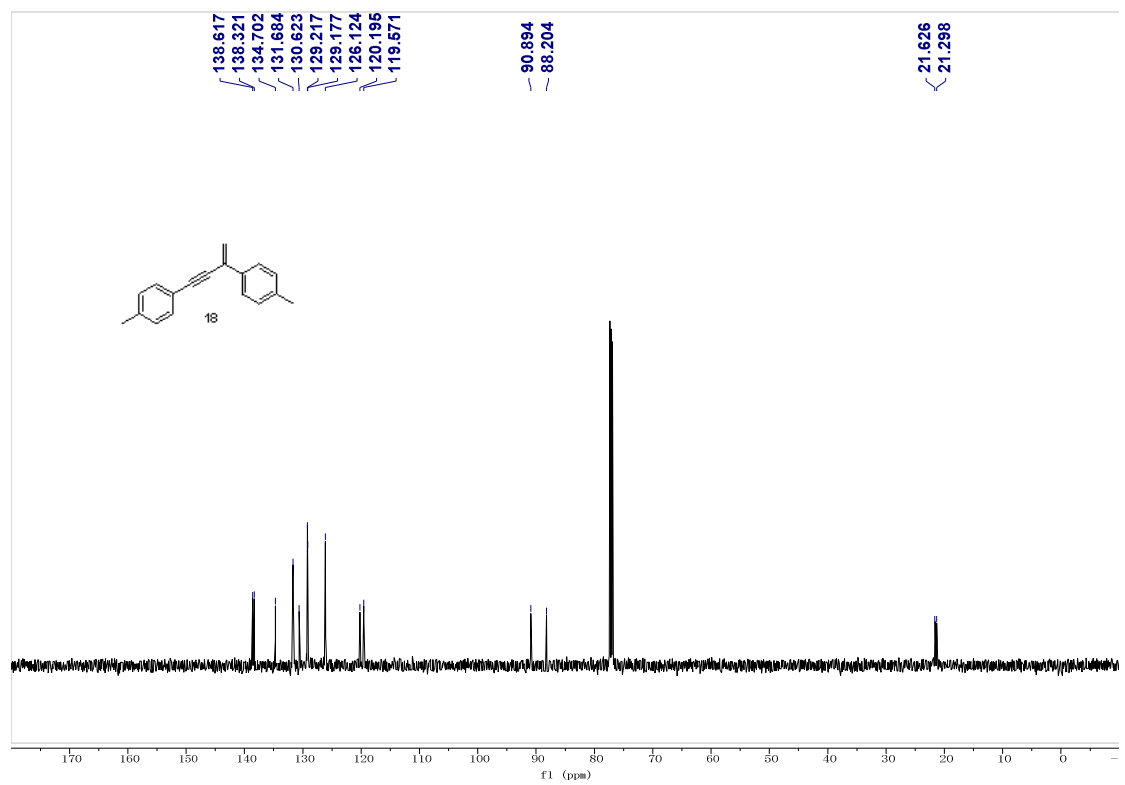

QB-3-C7.1.fid

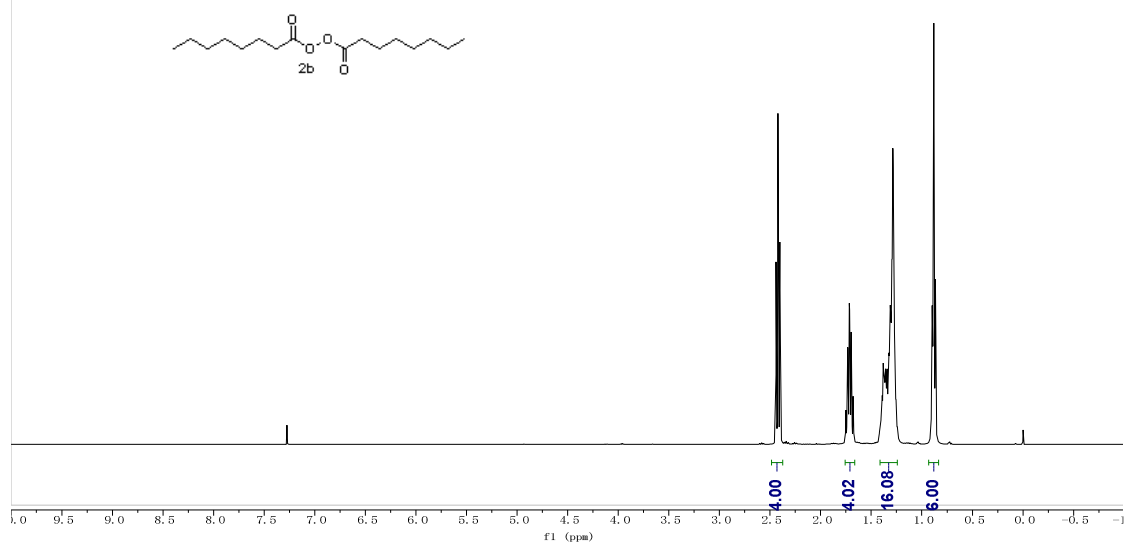

QB-3-C7-C.1.fid

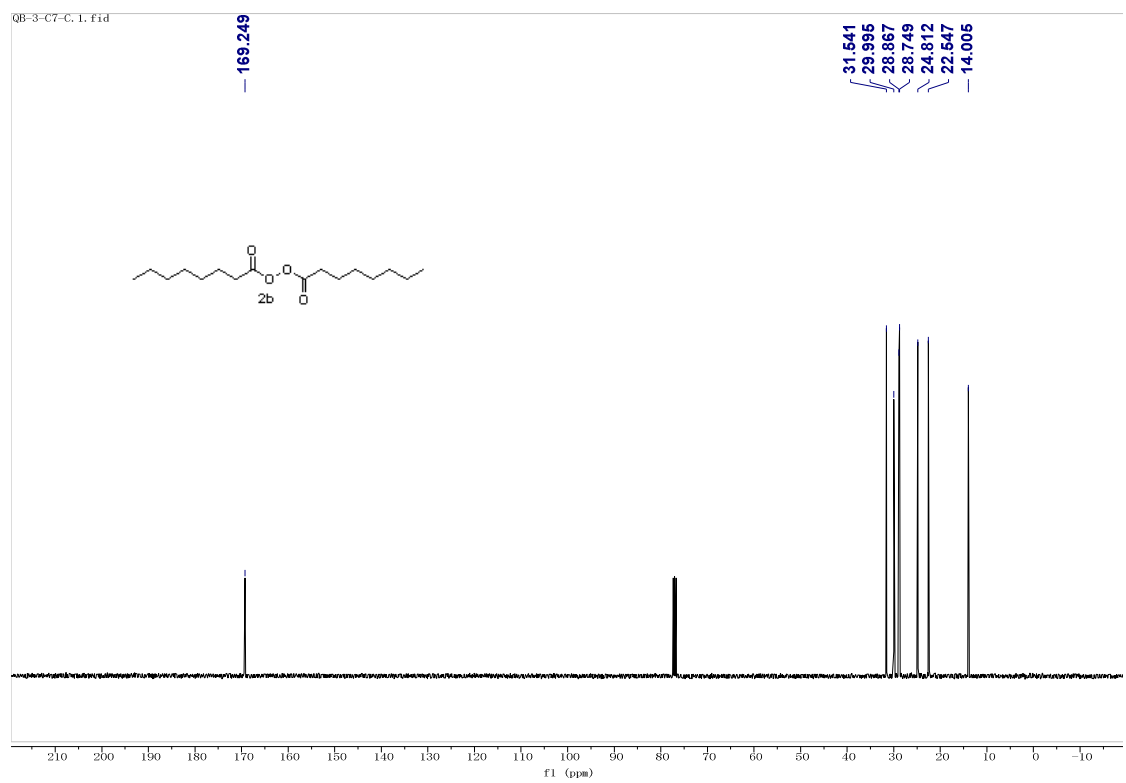

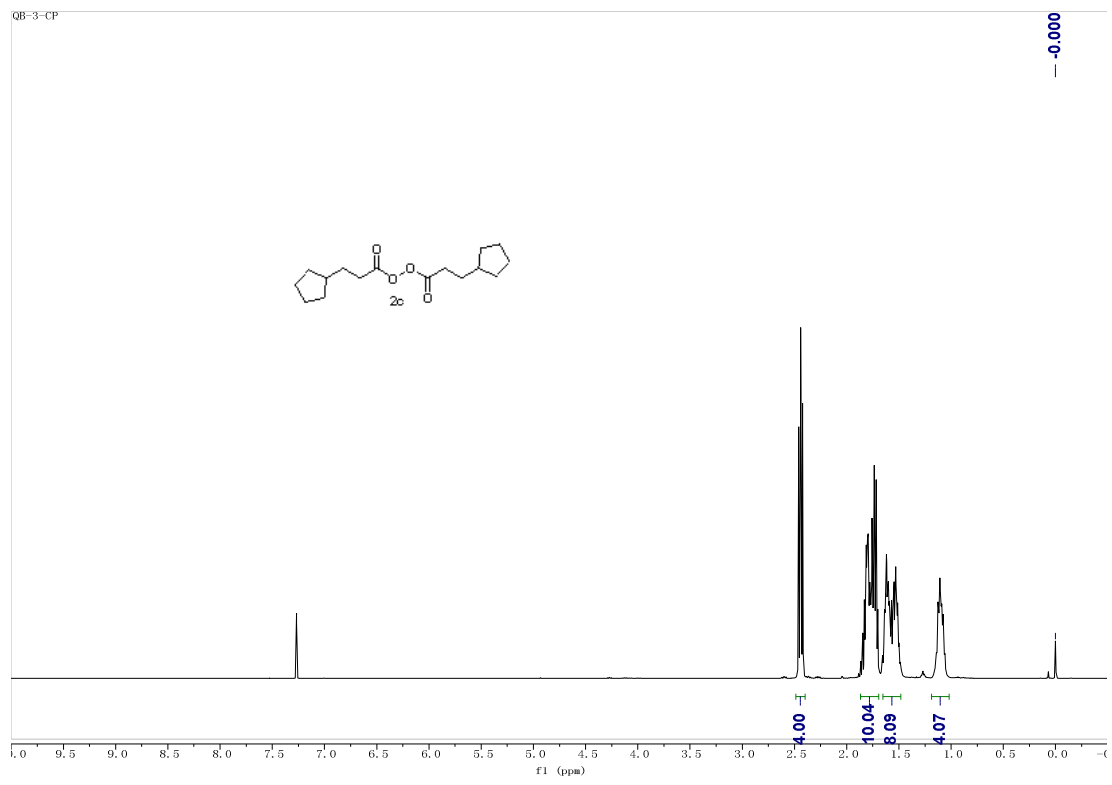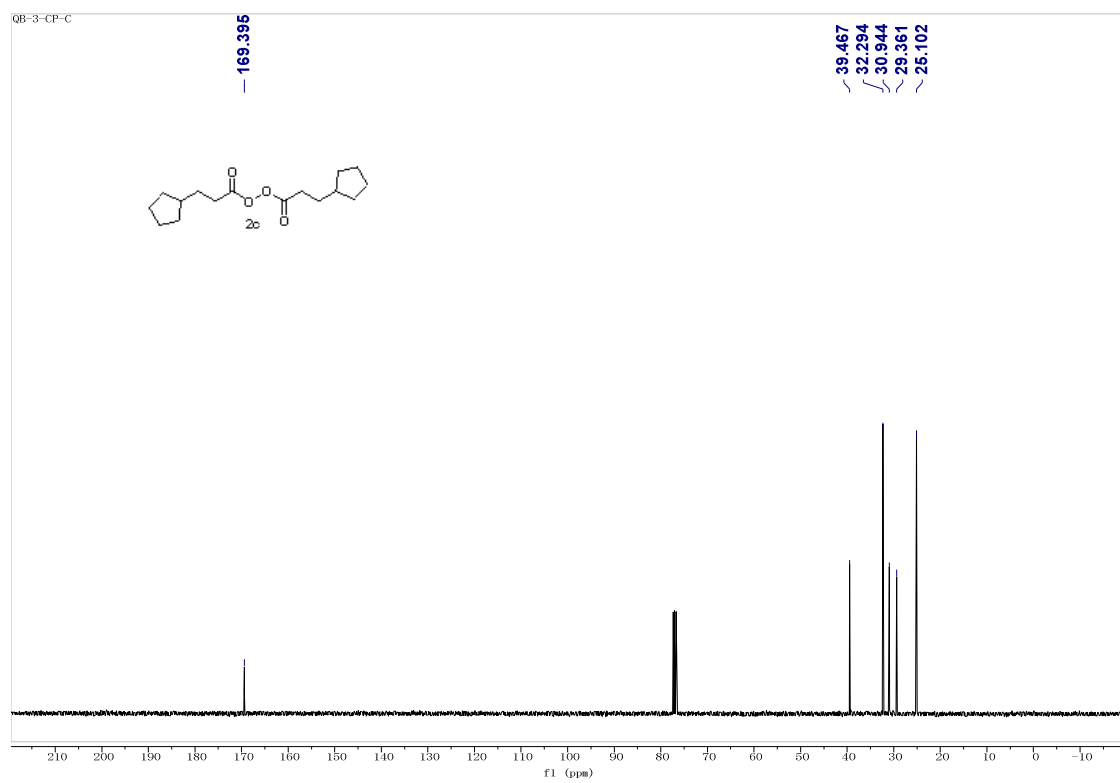

yeq-4-3e. 1. fid

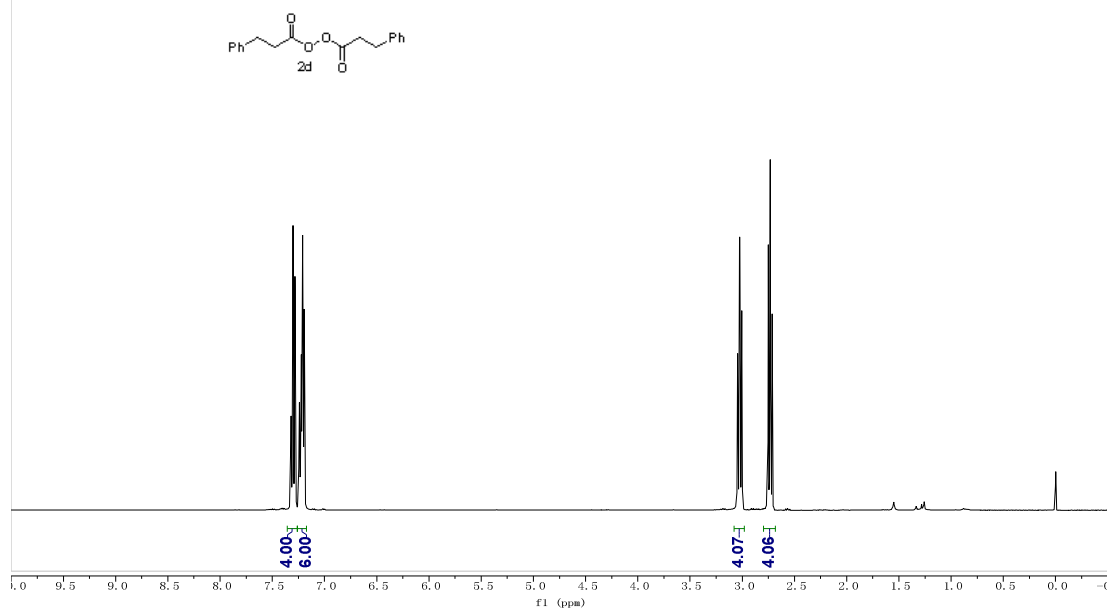

yeq-4-3e. 2. fid

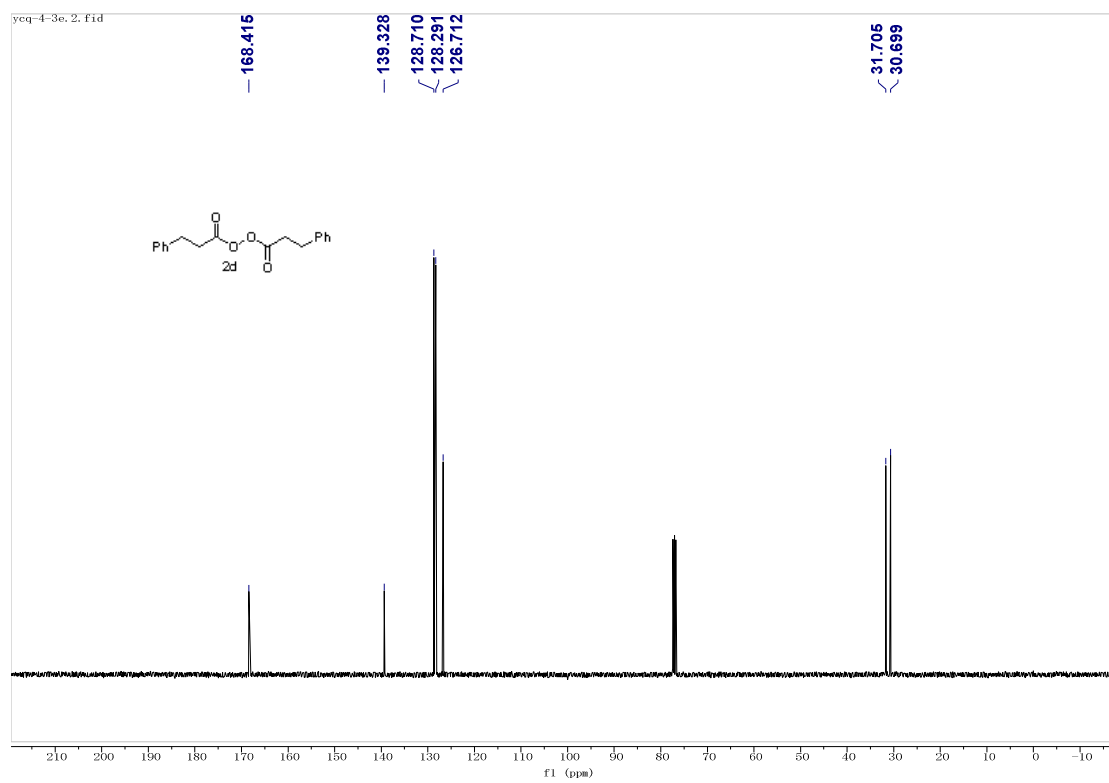

hwj-2-153-6

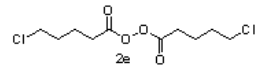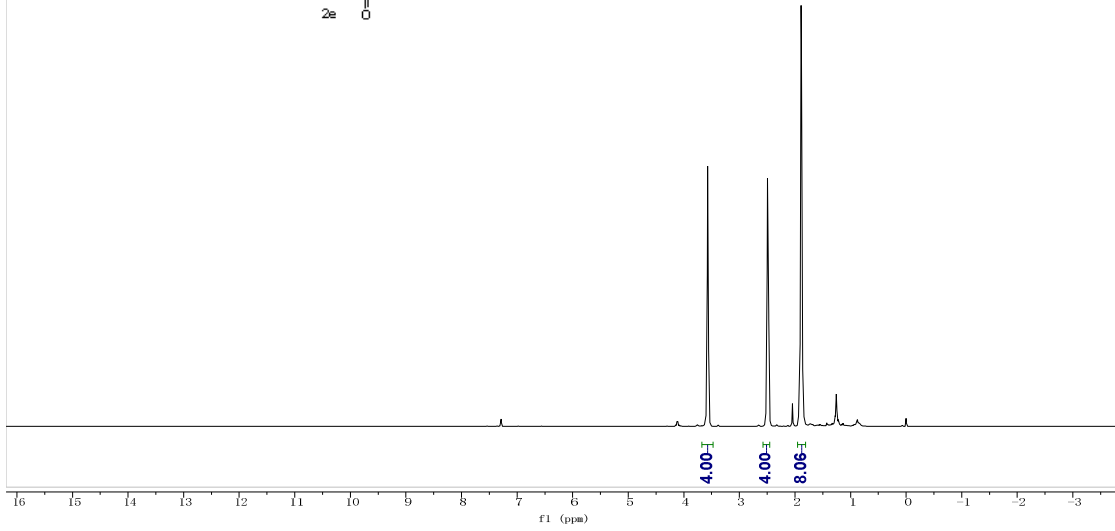

hwj-2-153-6

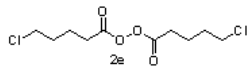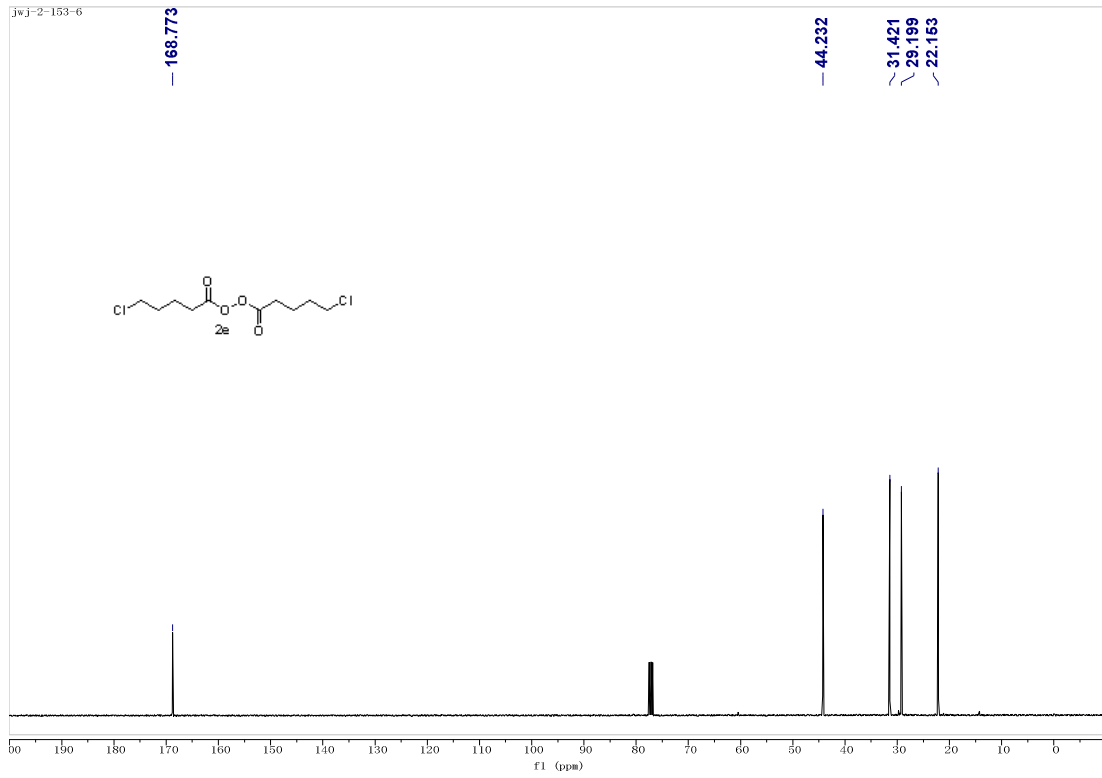

yeq-4-3i. 1. fid

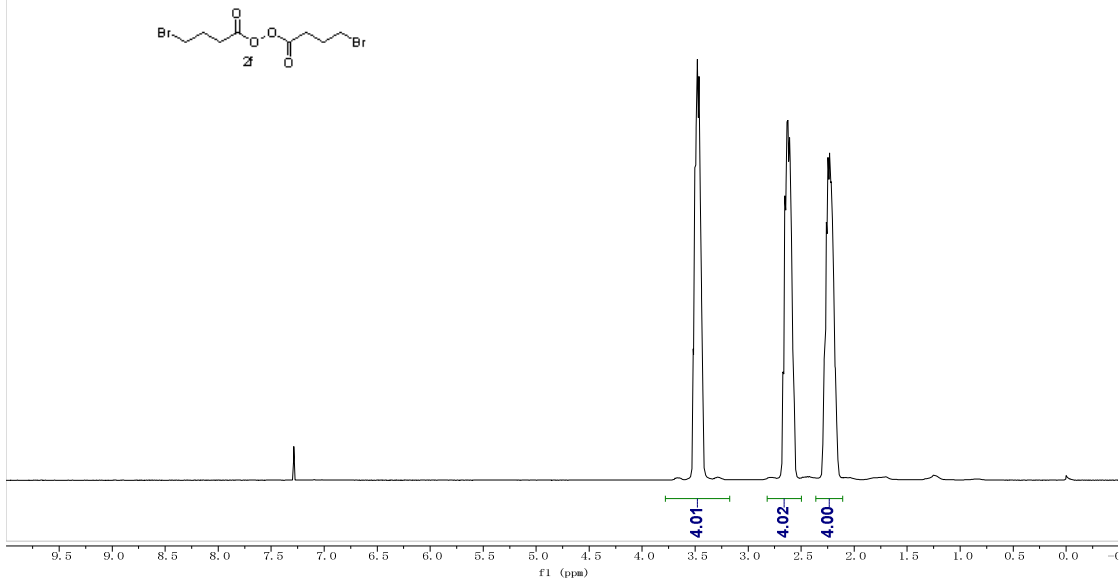

yeq-4-3i. 3. fid

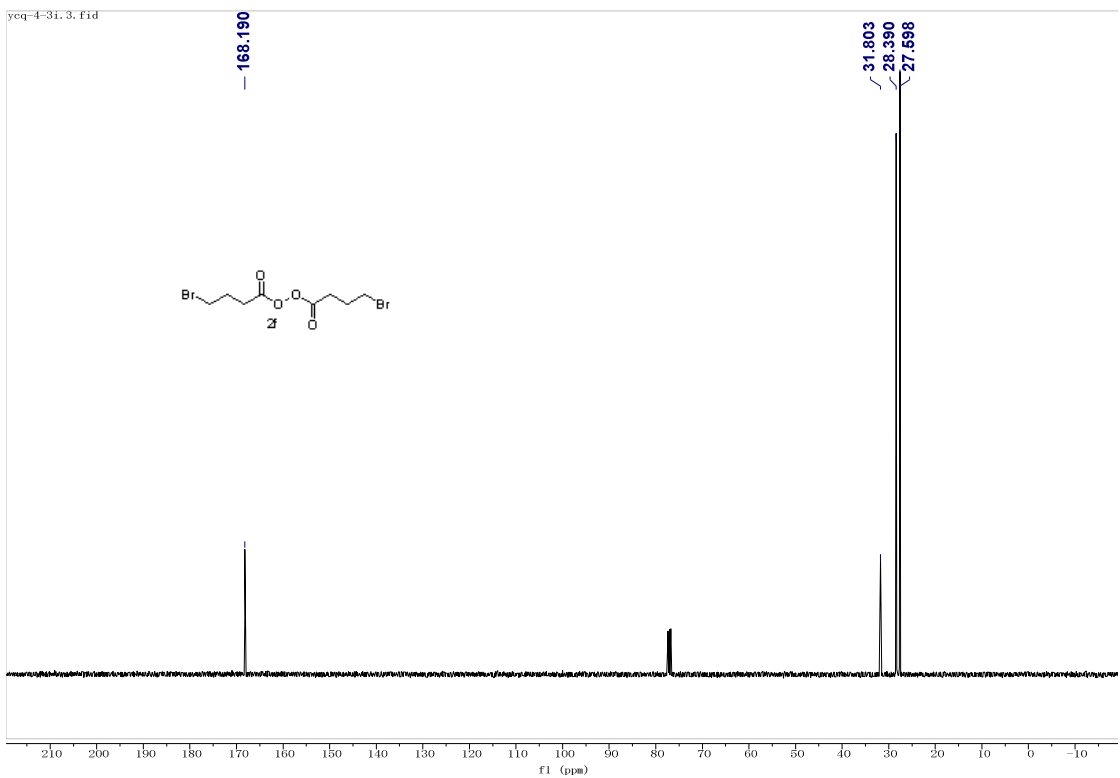

Ge-8-113-2.1.fid

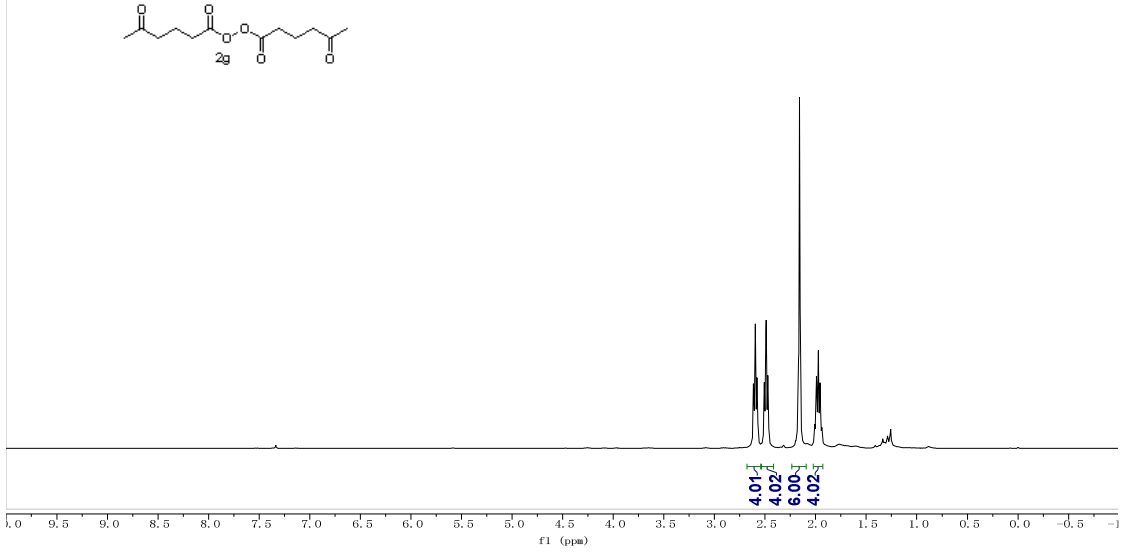

Ge-8-114-2.2.fid

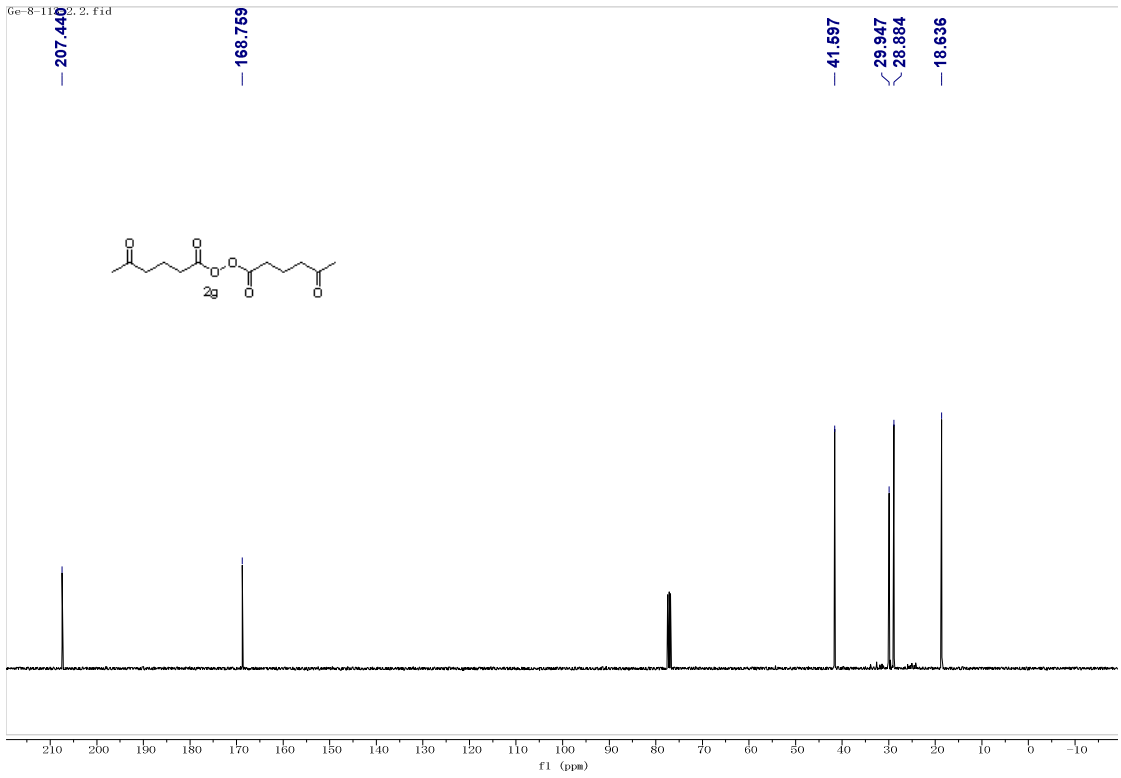

QB-3-D

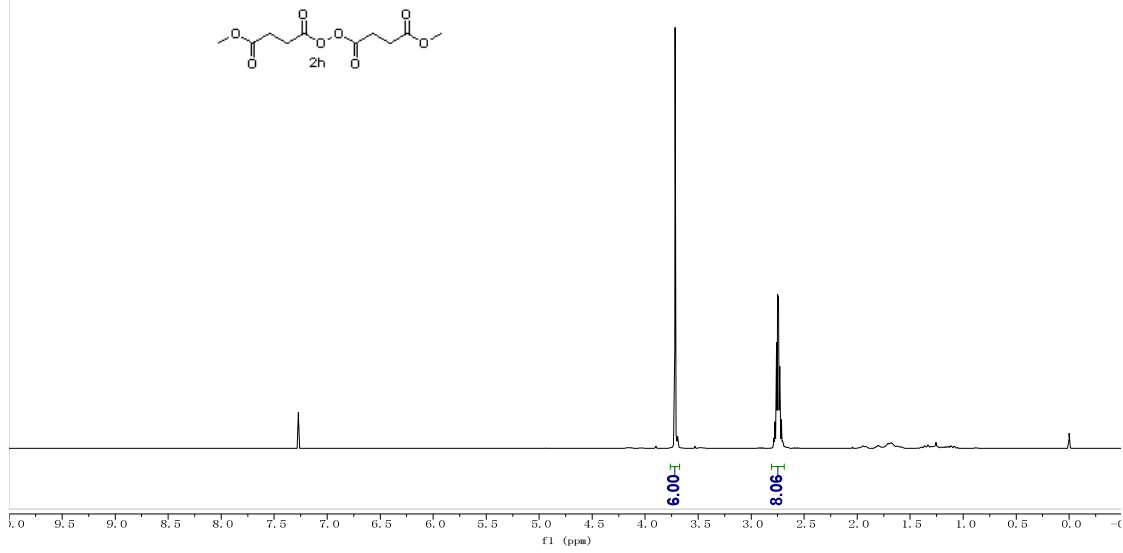

QB-3-D-C

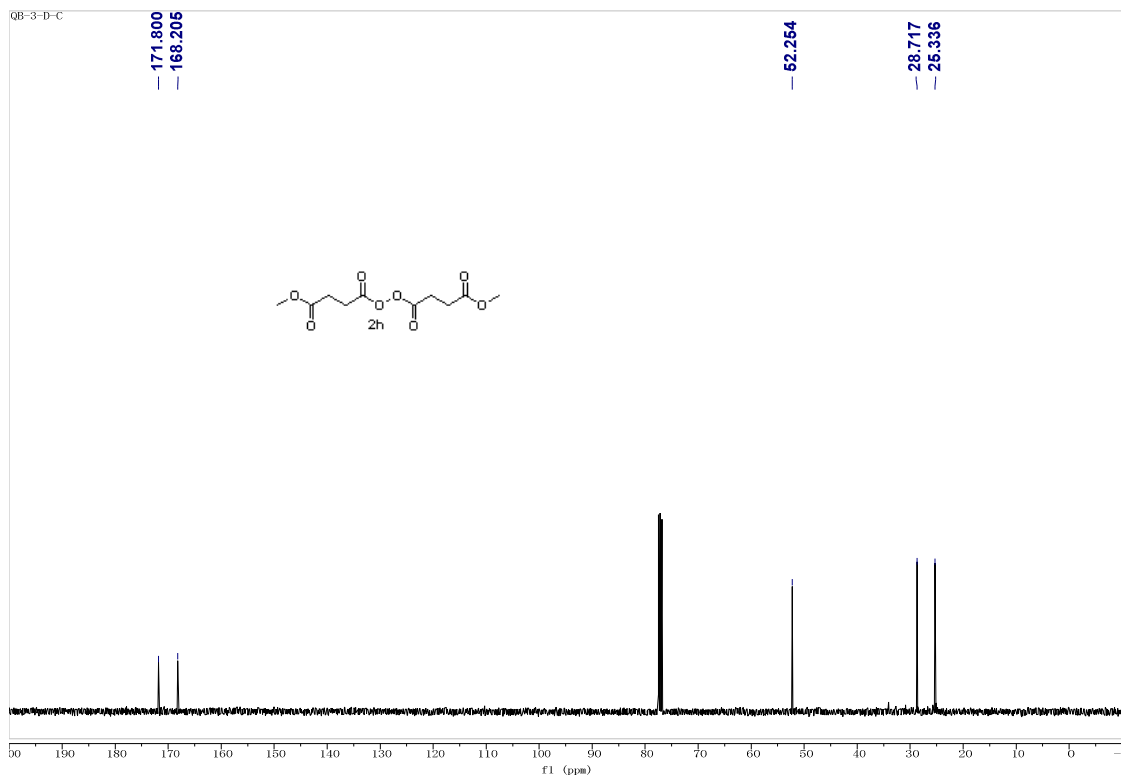



QB-3-X

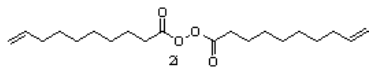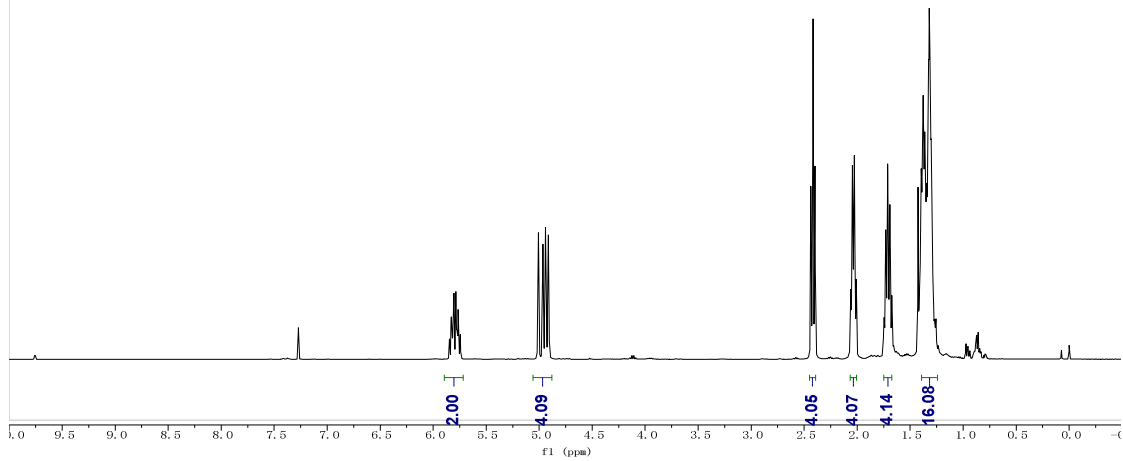

QB-3-Y-C

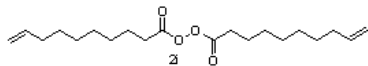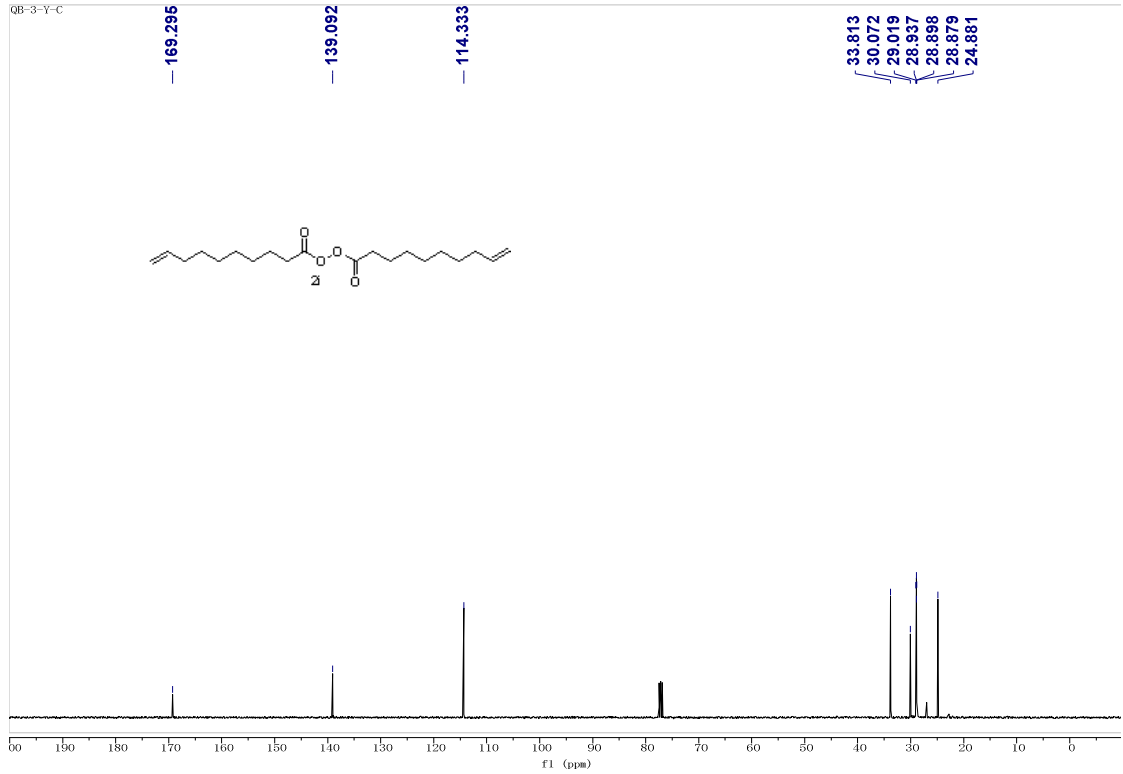

dw1-4-43.1.fid

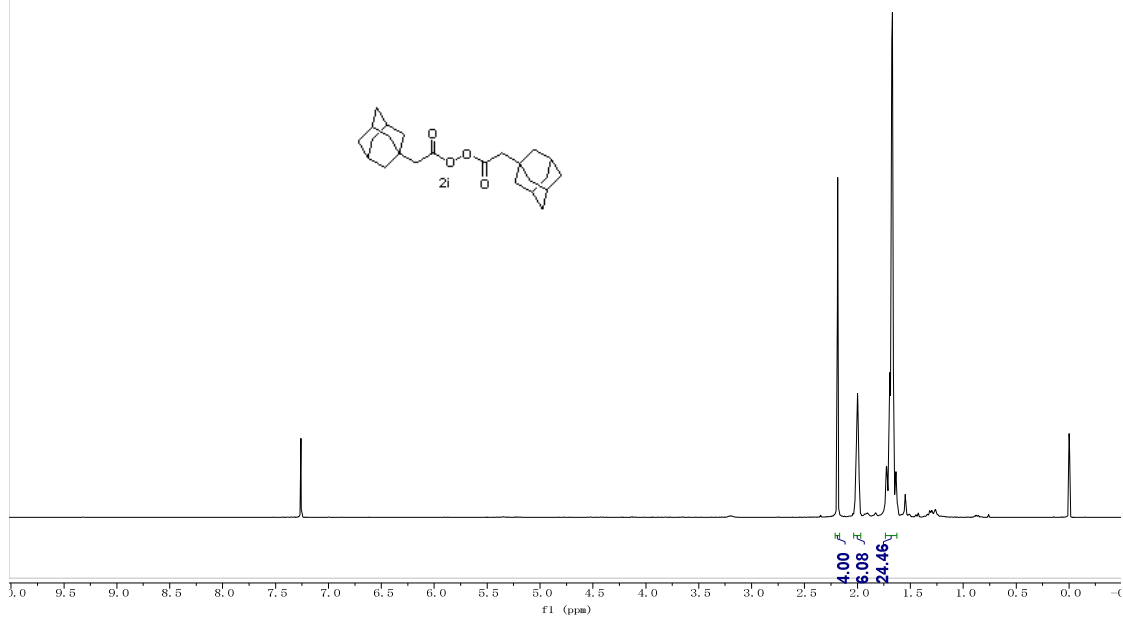

dw1-4-53C.2.fid

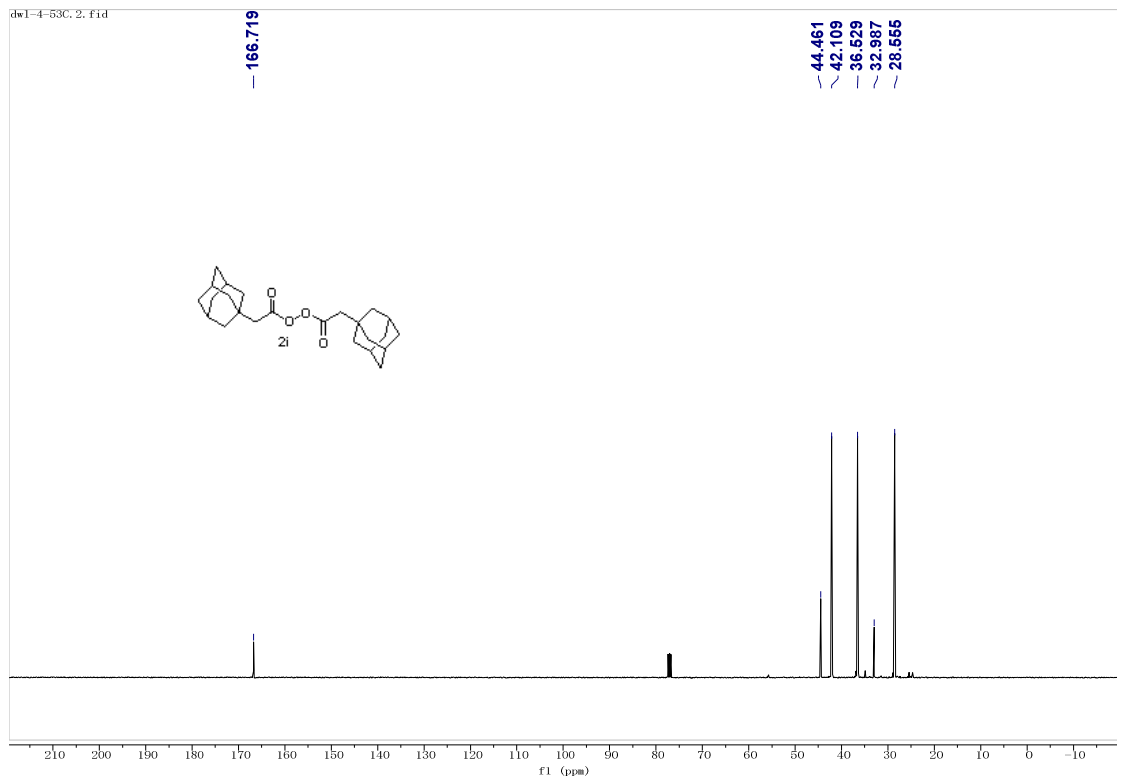

ycq-6-139-1  
single\_pulse

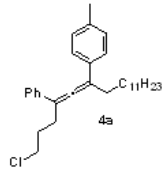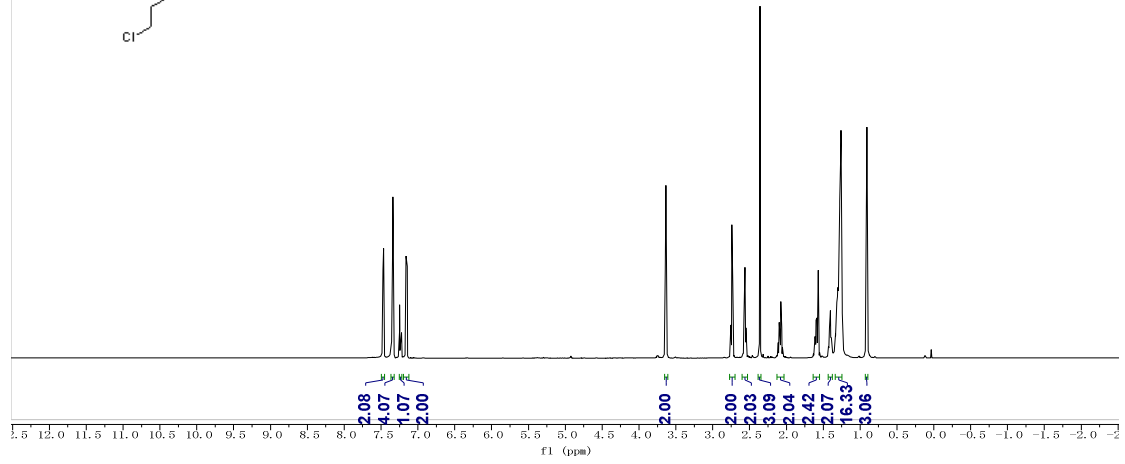

ycq-6-139-1  
single\_pulse coupled gated NOE

204.883

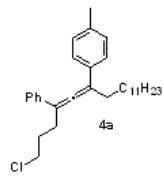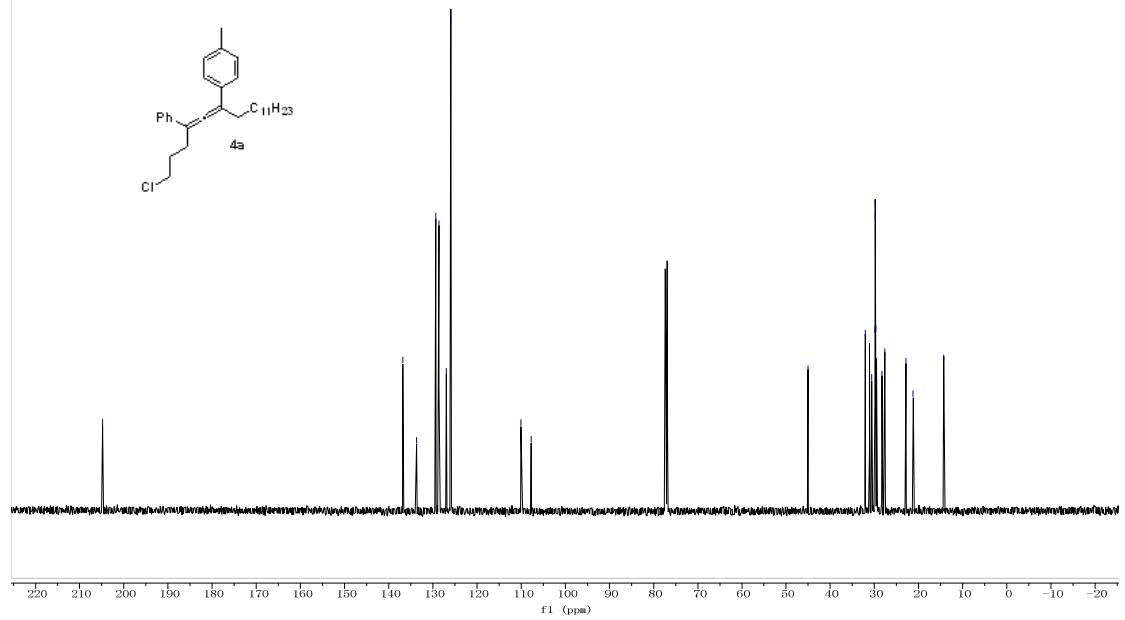

ycq-6-131-2  
single\_pulse

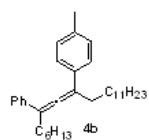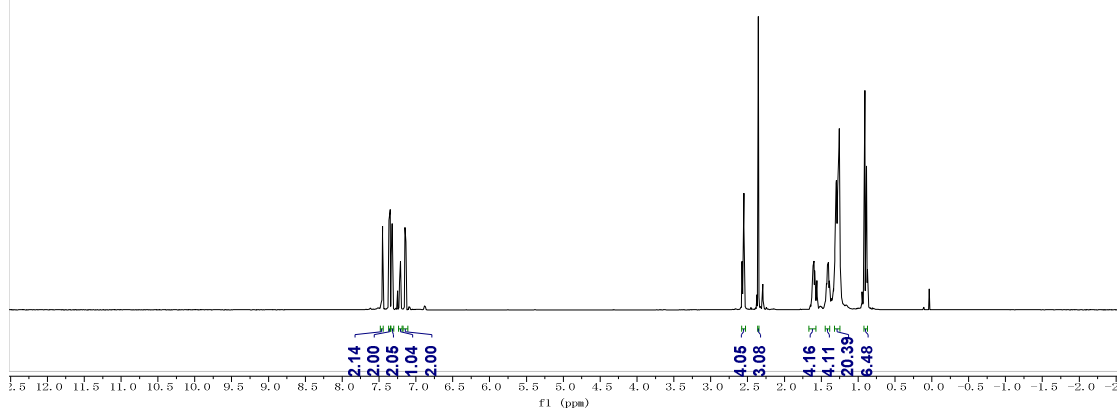

ycq-6-131-2  
single\_pulse, decoupled gated NOE

205.149

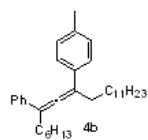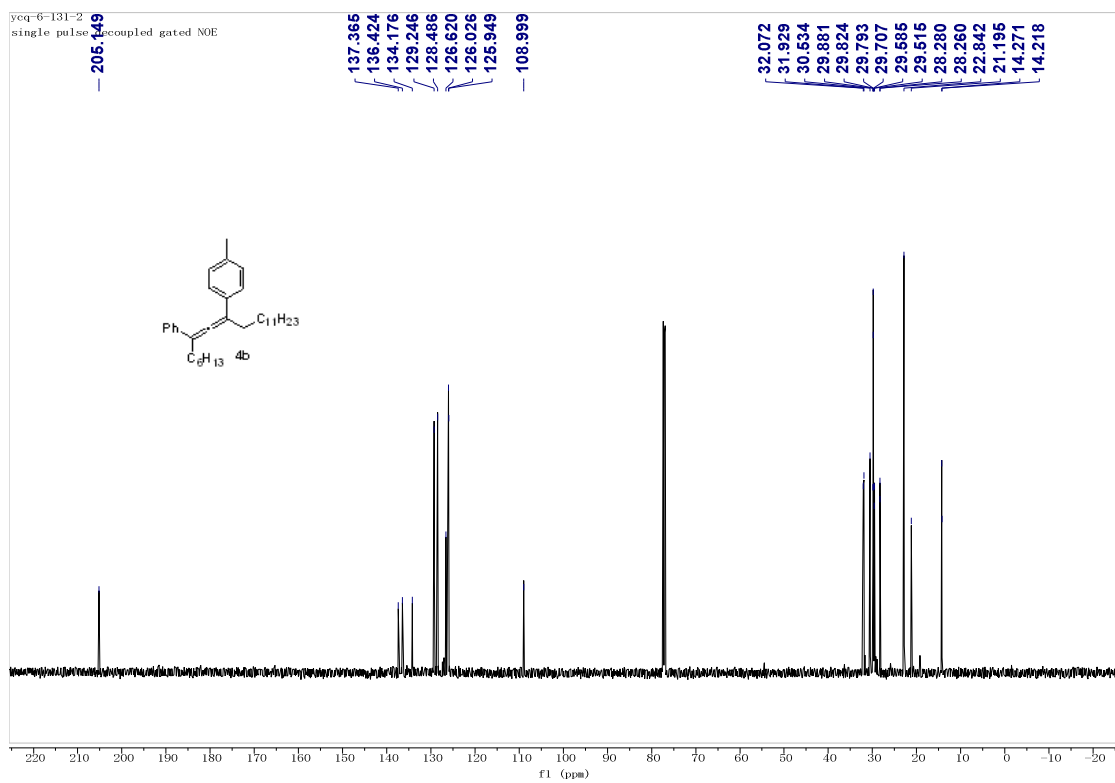

ycq-6-155-1.1.fid

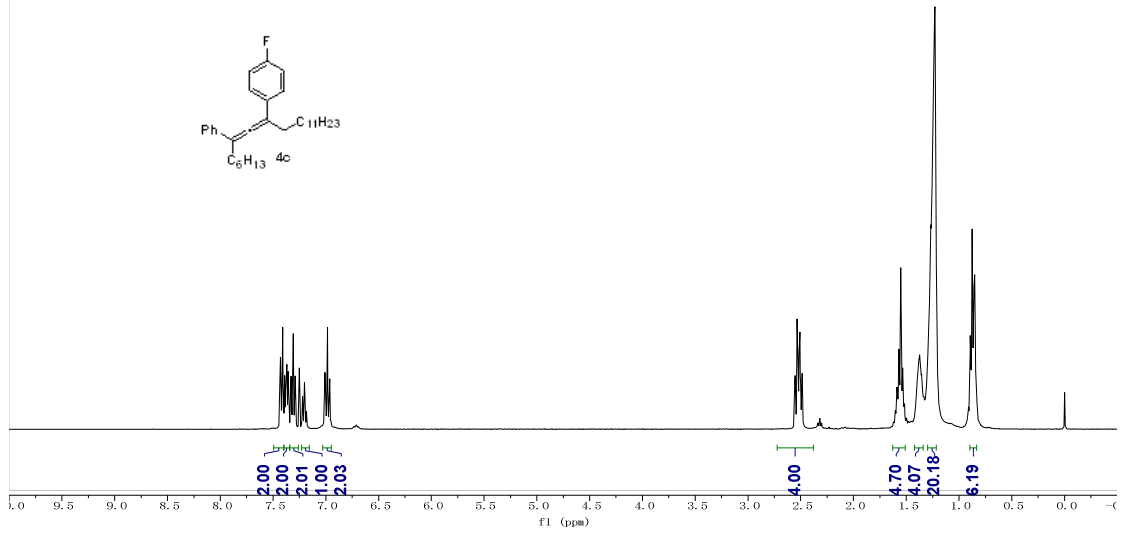

ycq-6-155-1.1.fid

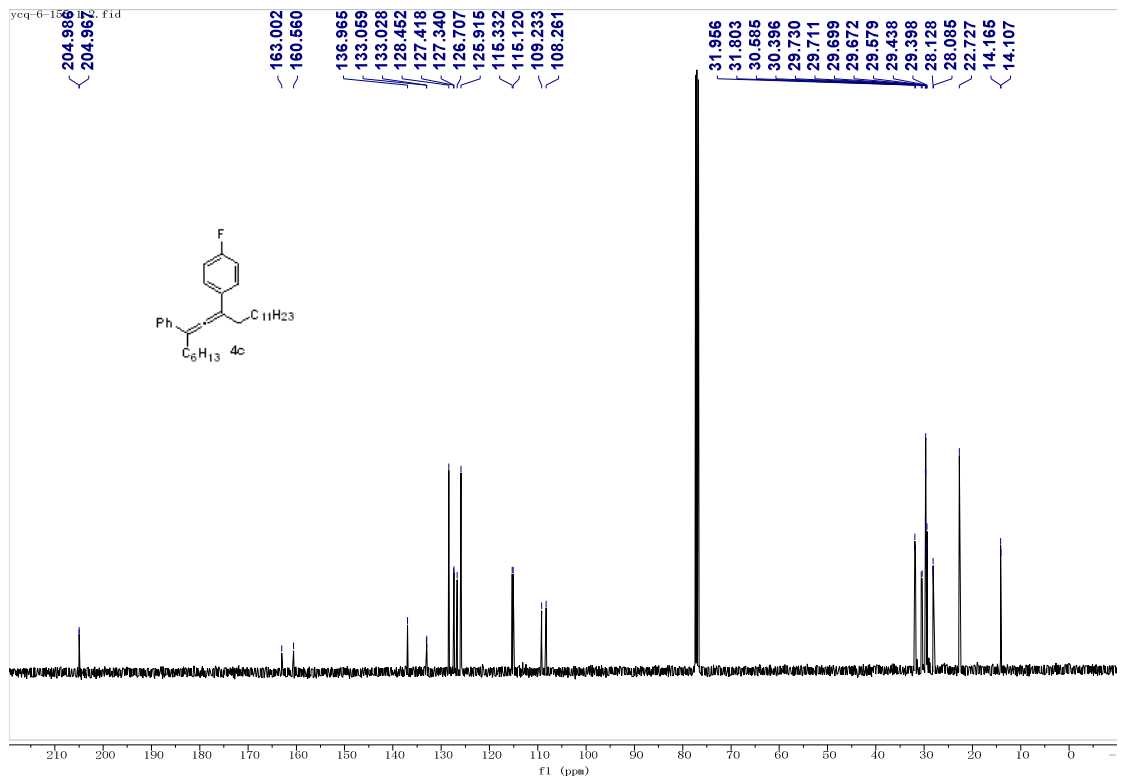

ycq-6-160-1  
single\_pulse

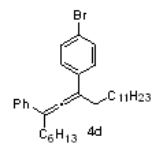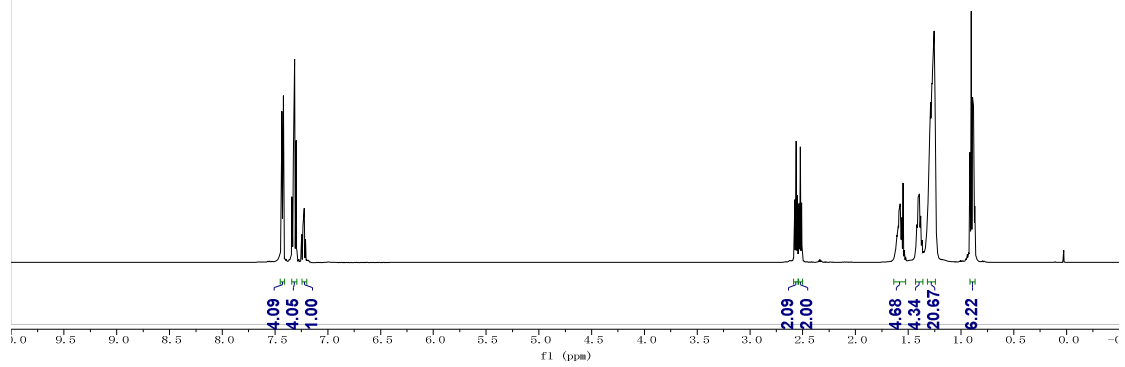

ycq-6-155-3  
single\_pulse coupled gated NOE

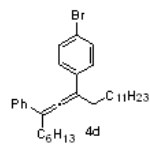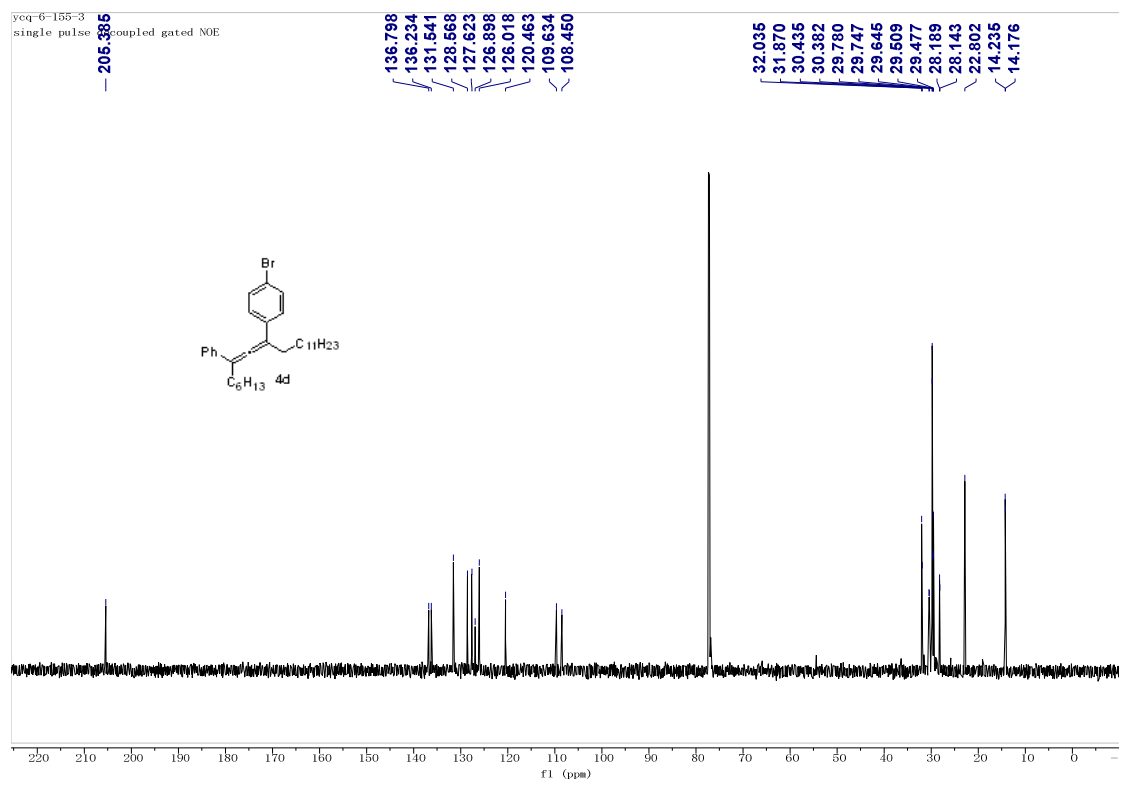

ycq-6-131-1  
single\_pulse

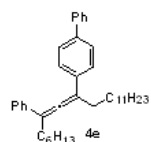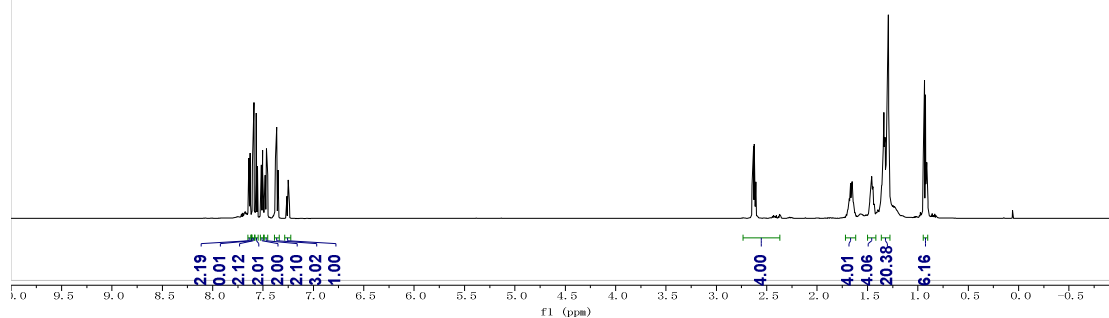

ycq-6-131-1  
single\_pulse, decoupled gated NOE

205.7311

141.031  
139.565  
137.162  
136.223  
128.908  
128.584  
127.282  
127.146  
127.080  
126.808  
126.465  
126.101  
109.356  
108.954

32.103  
31.960  
30.869  
30.532  
29.927  
29.870  
29.832  
29.748  
29.629  
29.554  
28.338  
28.302  
22.881  
14.310  
14.262

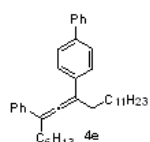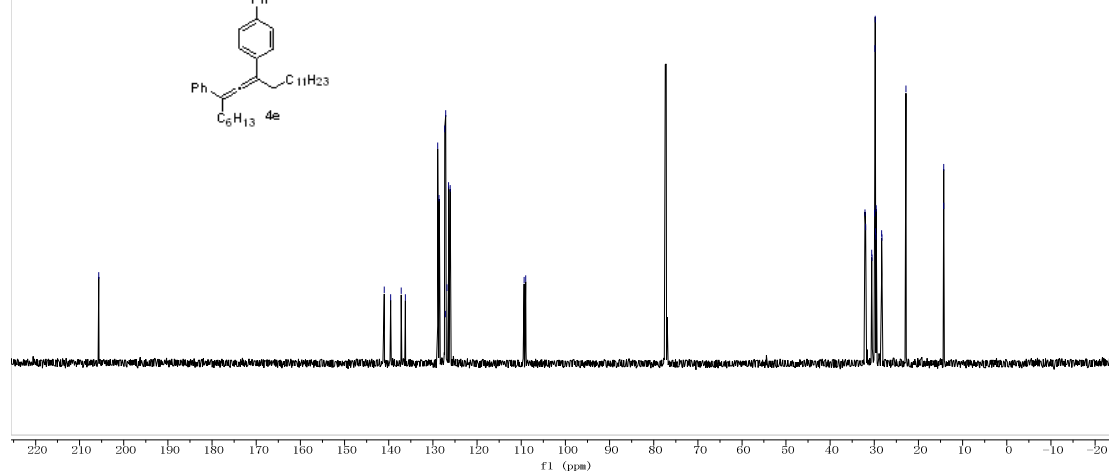

ycq-6-159-2-2  
single\_pulse

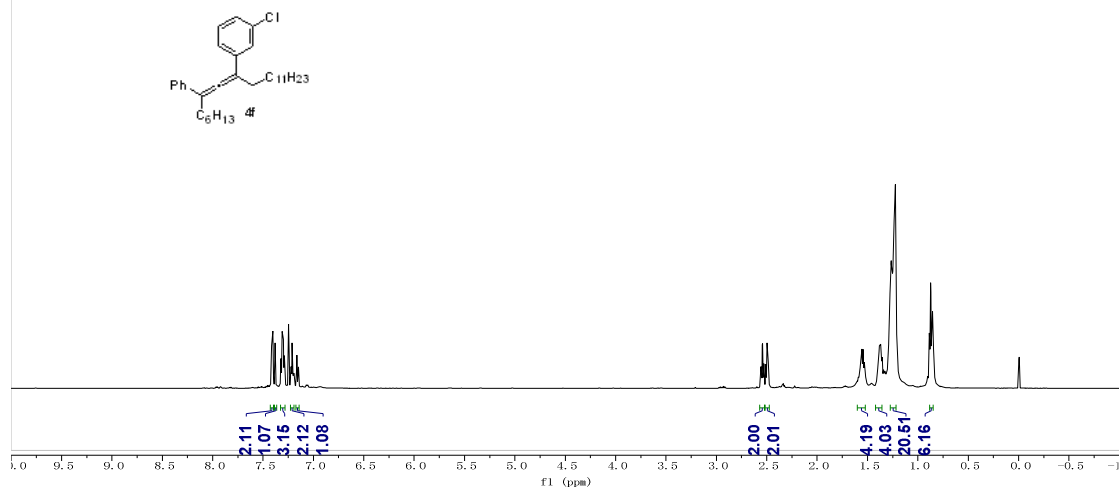

ycq-6-159-2-2  
single\_pulse,recoupled gated NOE

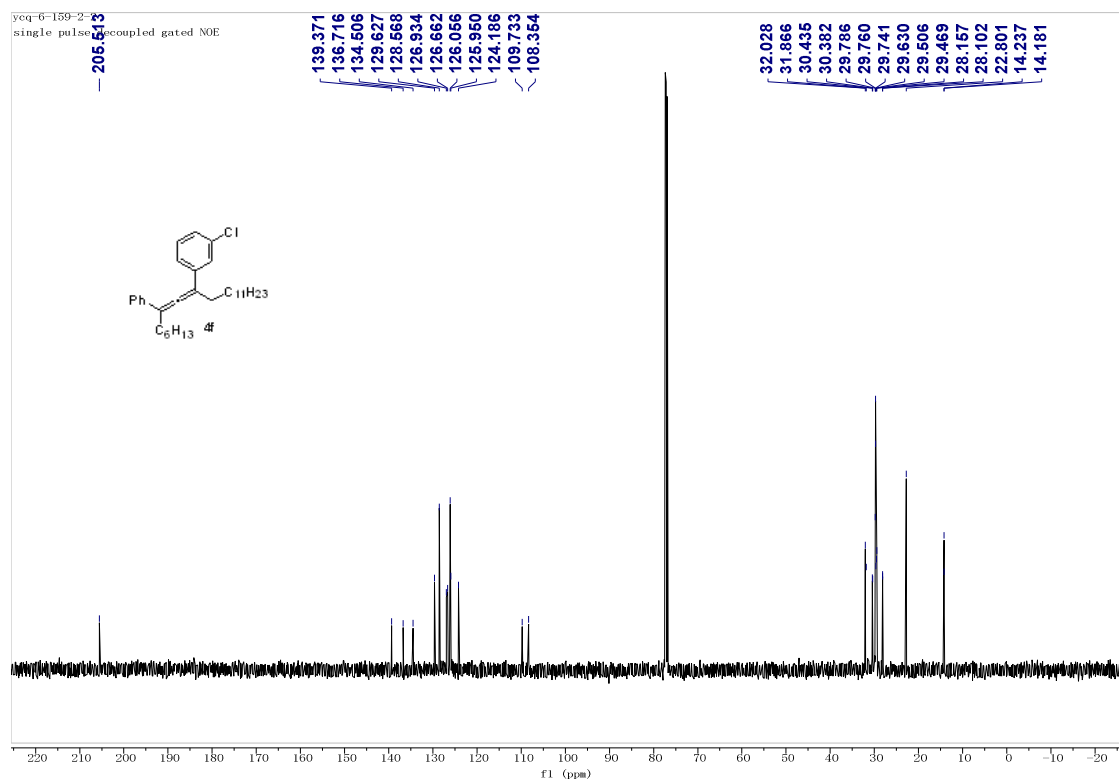



ycq-8-4i-1.1.fid

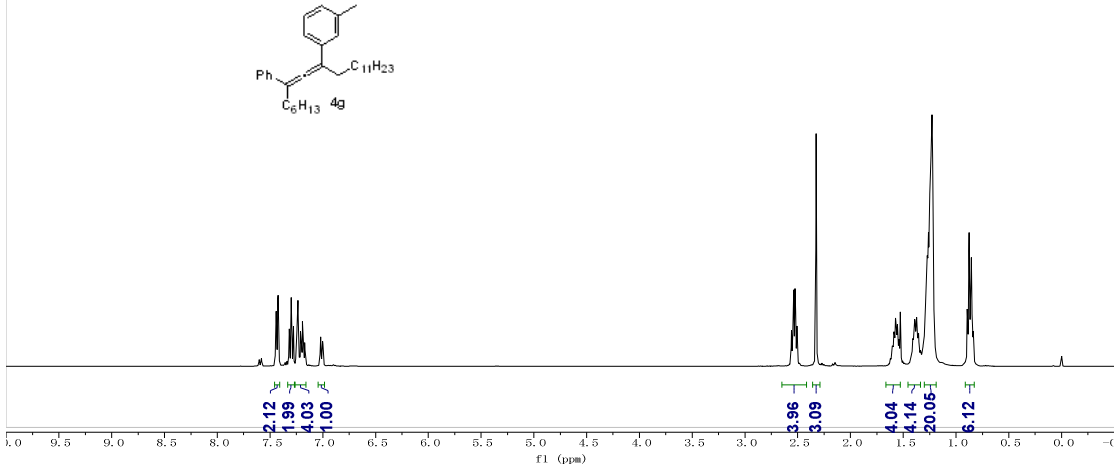

ycq-8-4i-2.fid

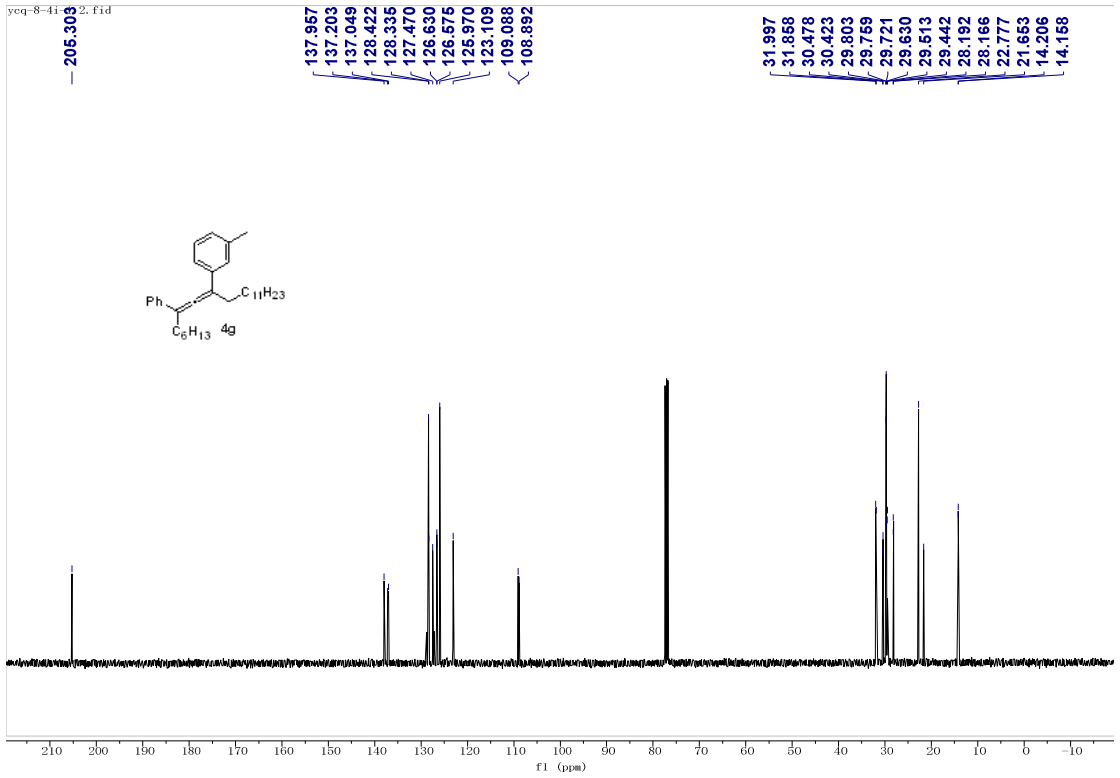

ycq-8-4k-1.1.fid

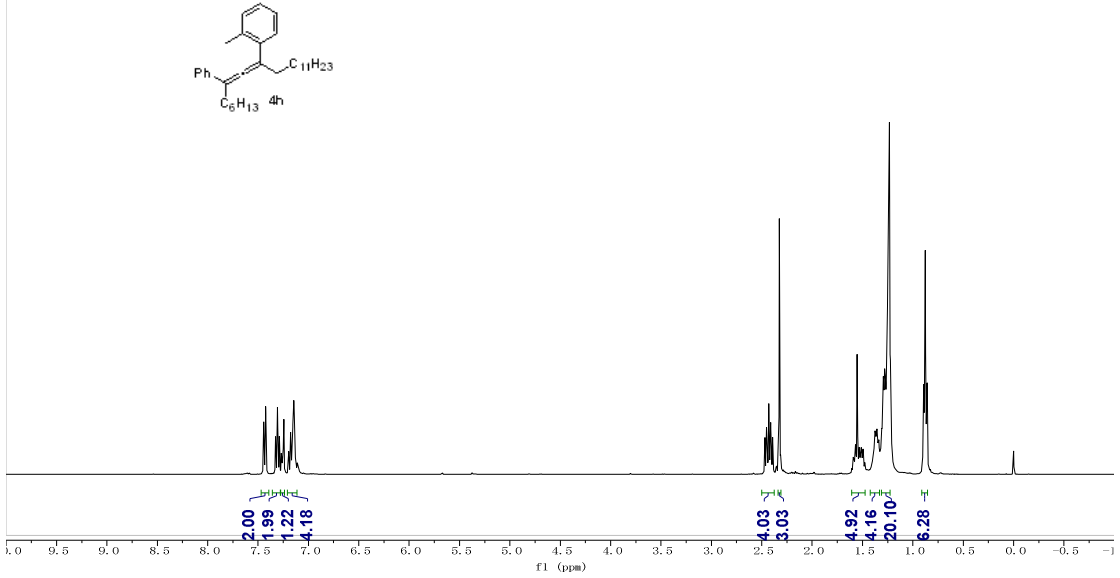

ycq-8-4k-1.fid

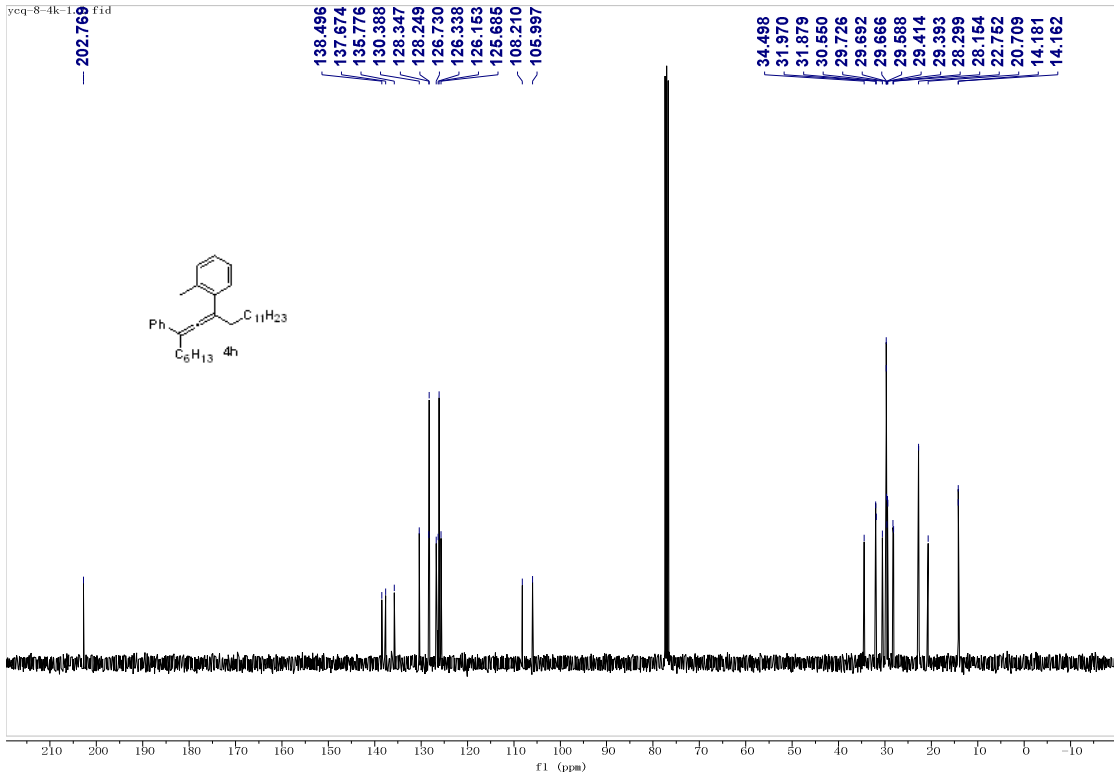

ycq-7-100-1.1.fid

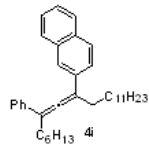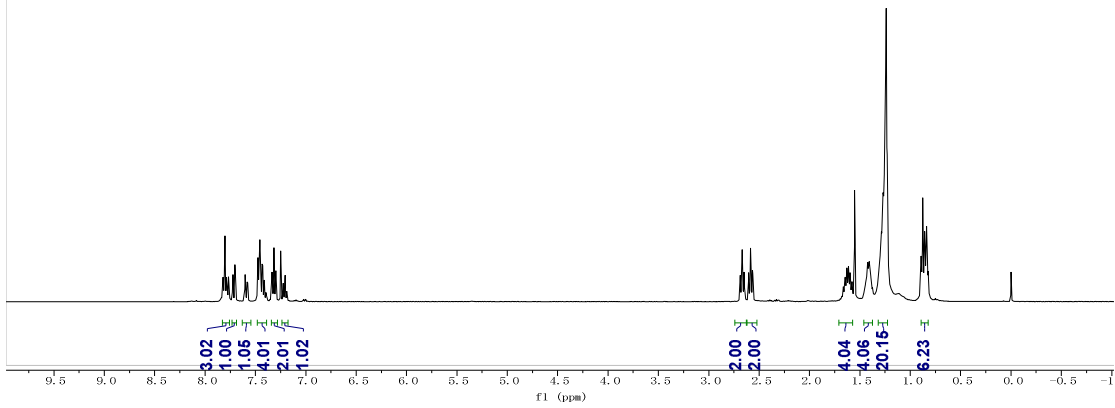

ycq-7-100-1.2.fid

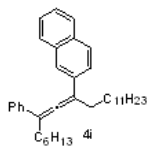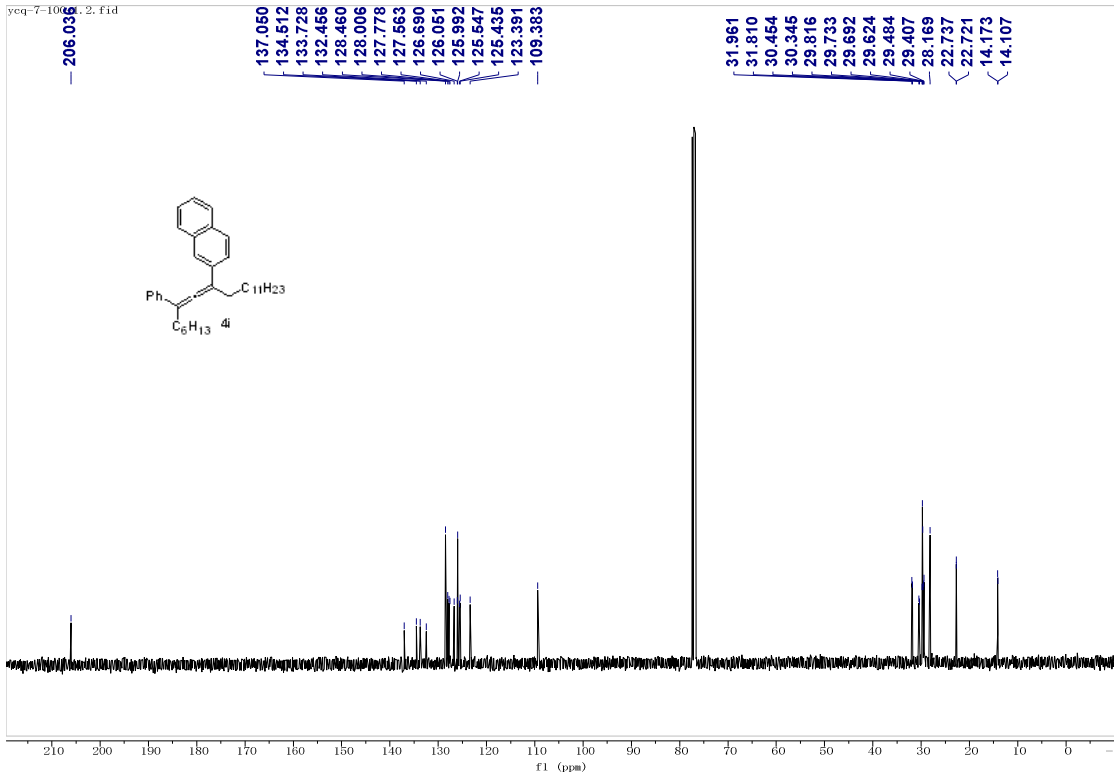

ycq-7-32-2 1  
single\_pulse

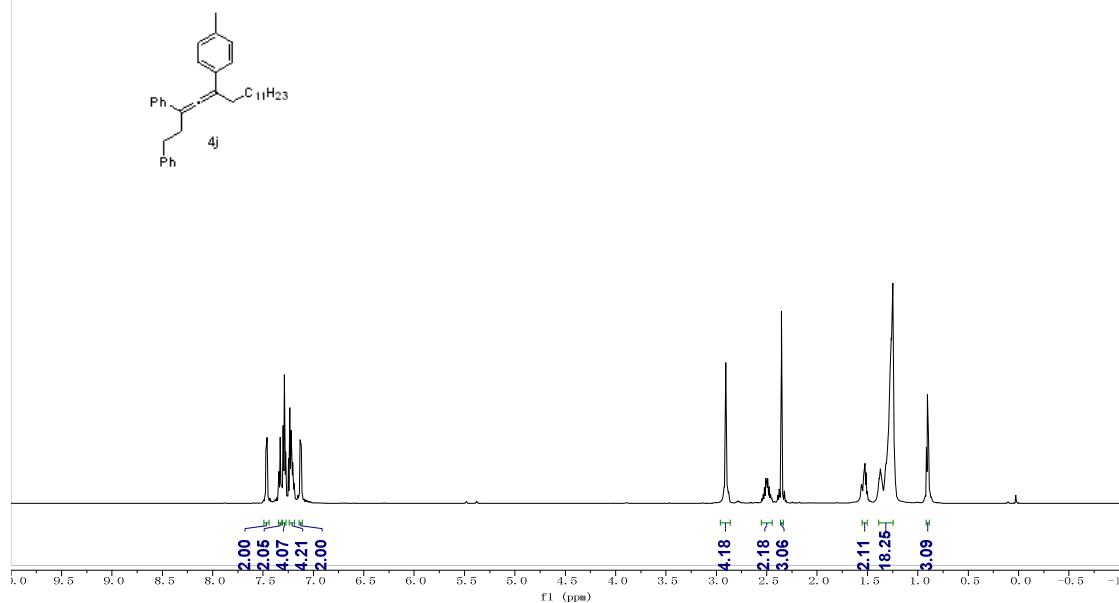

ycq-7-32-2  
single\_pulse, decoupled gated NOE

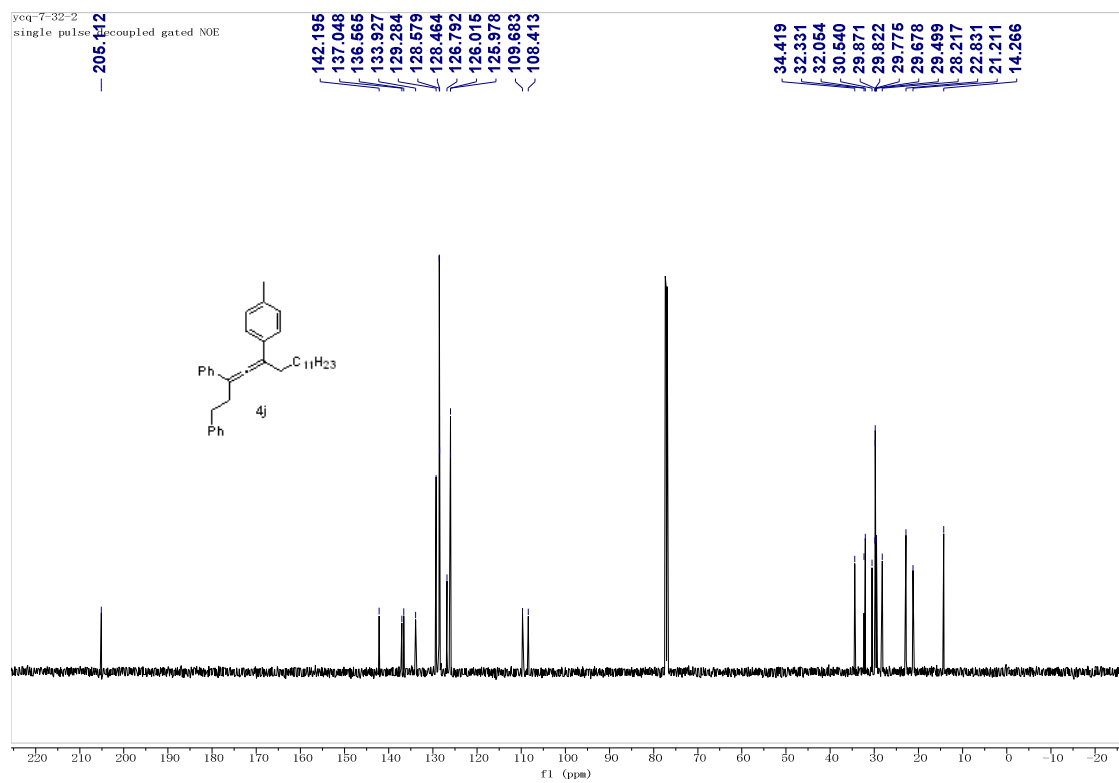

ycq-8-4n-1.1.fid

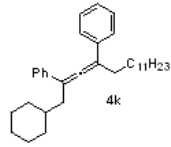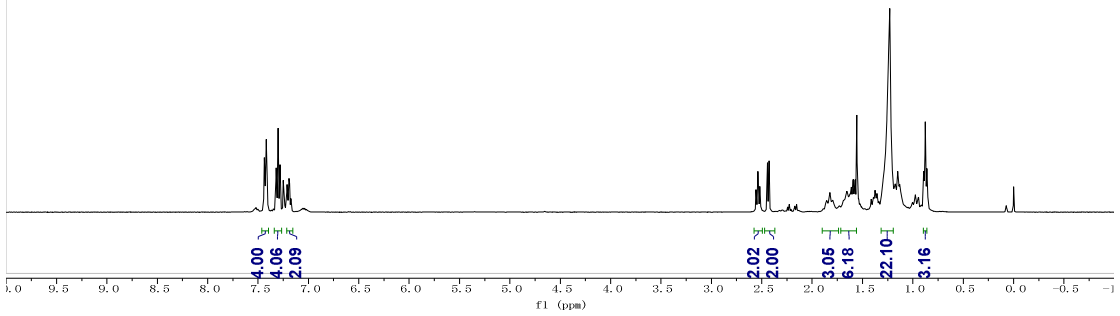

ycq-8-4n-1.1.fid

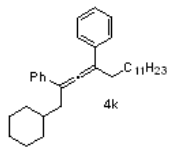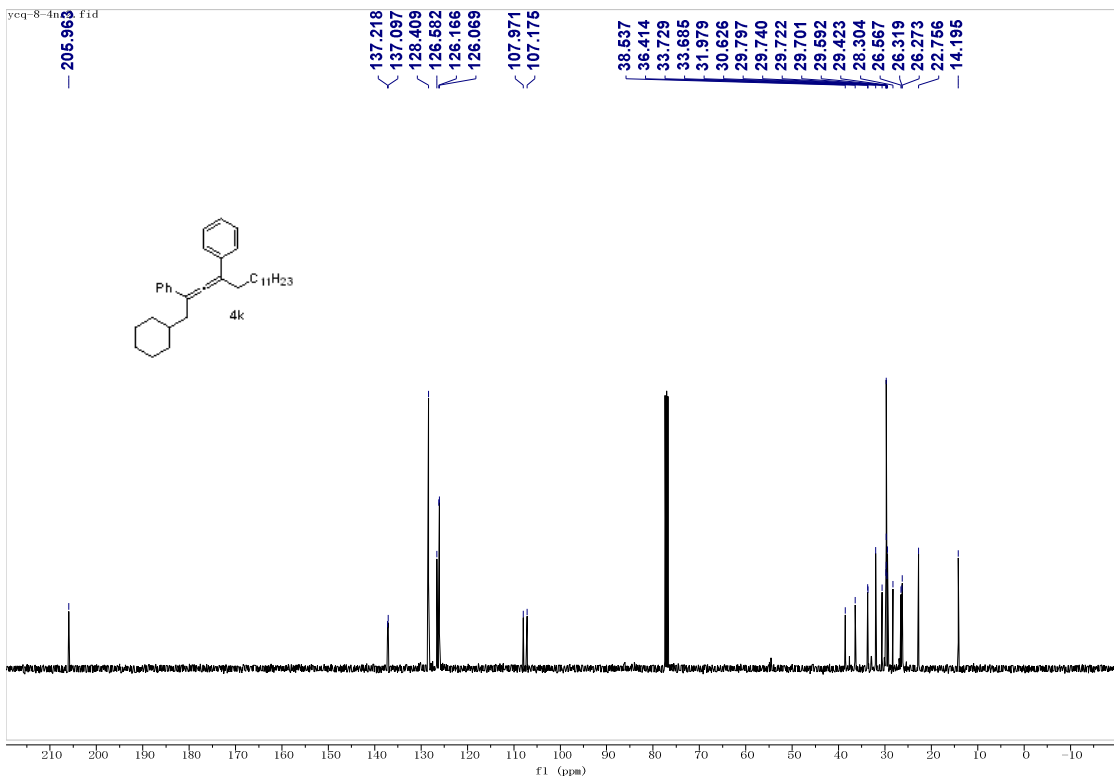

ycq-7-79-1  
single\_pulse

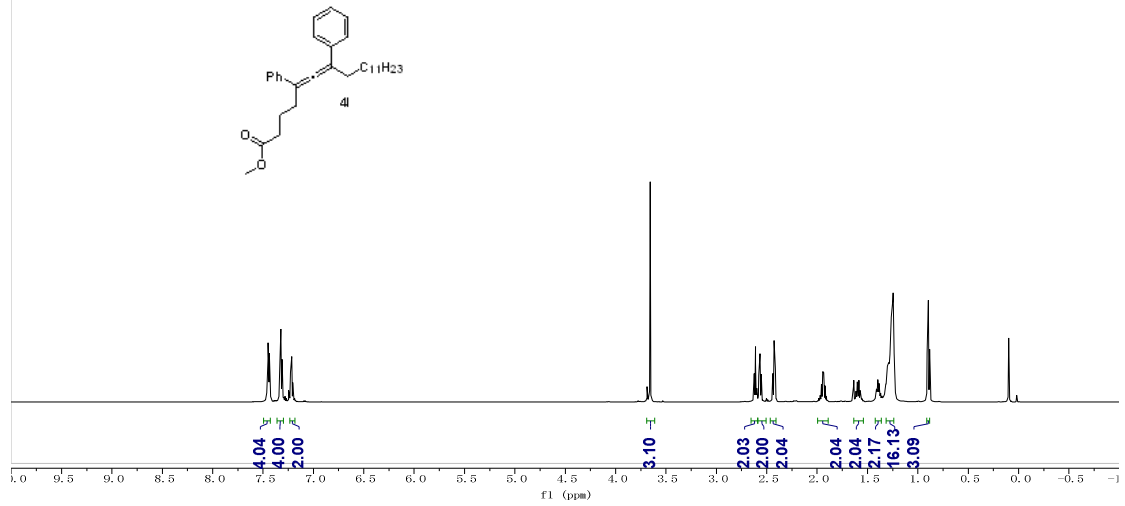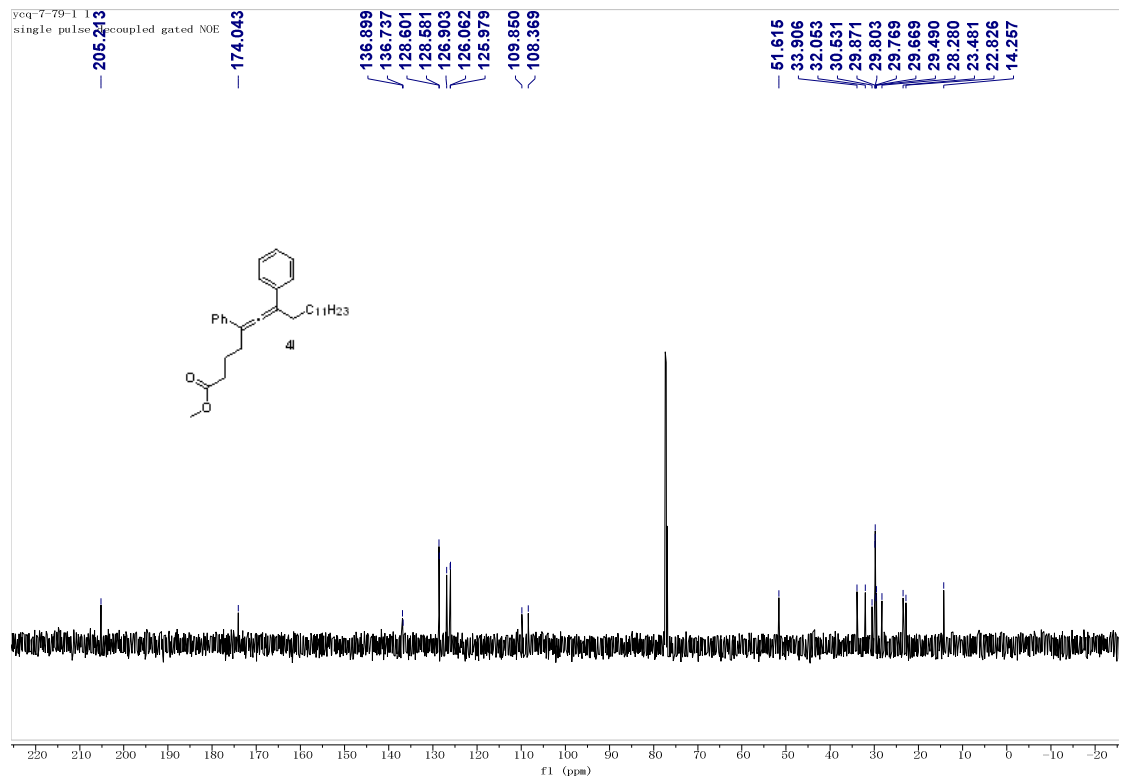

ycq-8-8-1.3.fid

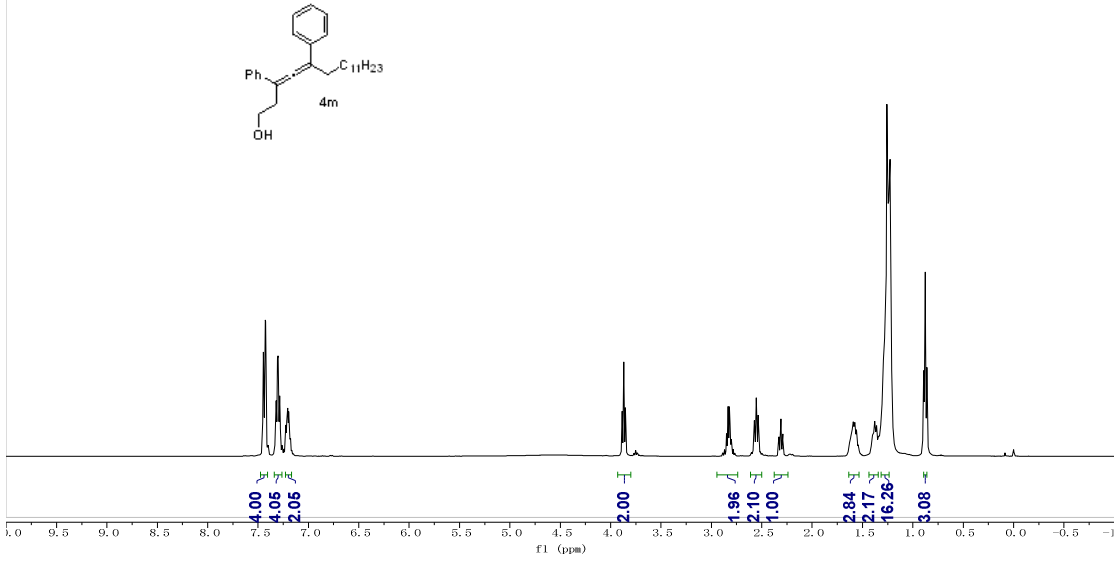

ycq-8-8-1.2.fid

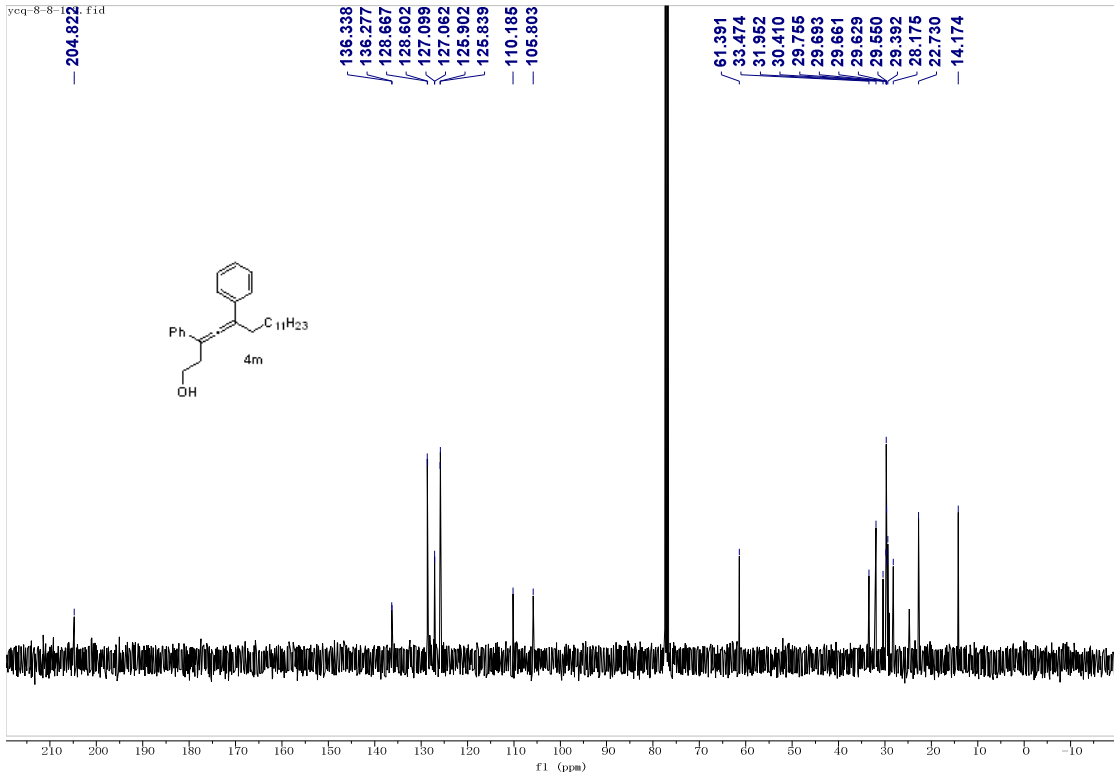

yeq-7-32-1  
single\_pulse

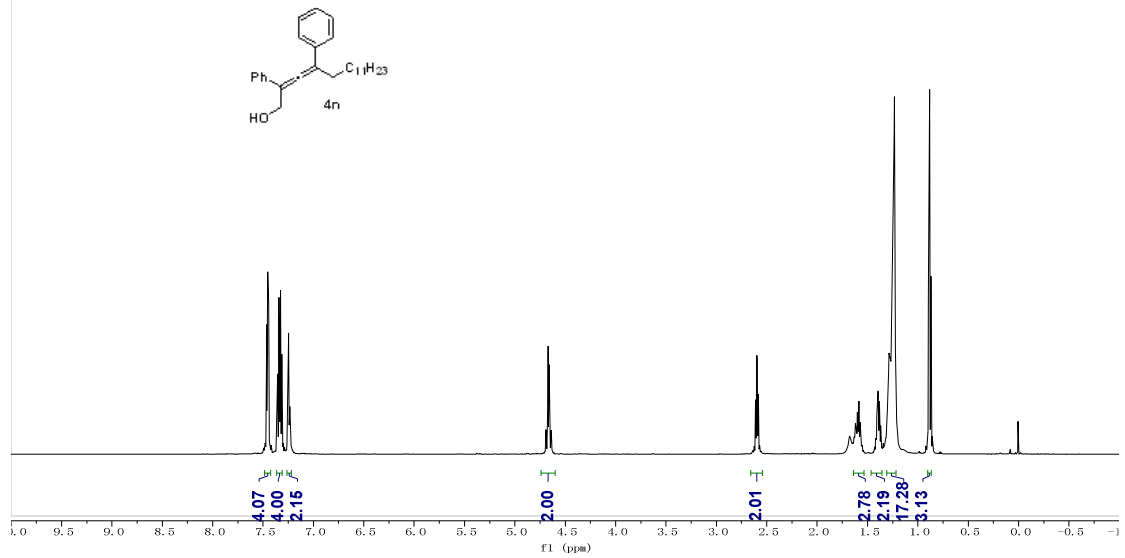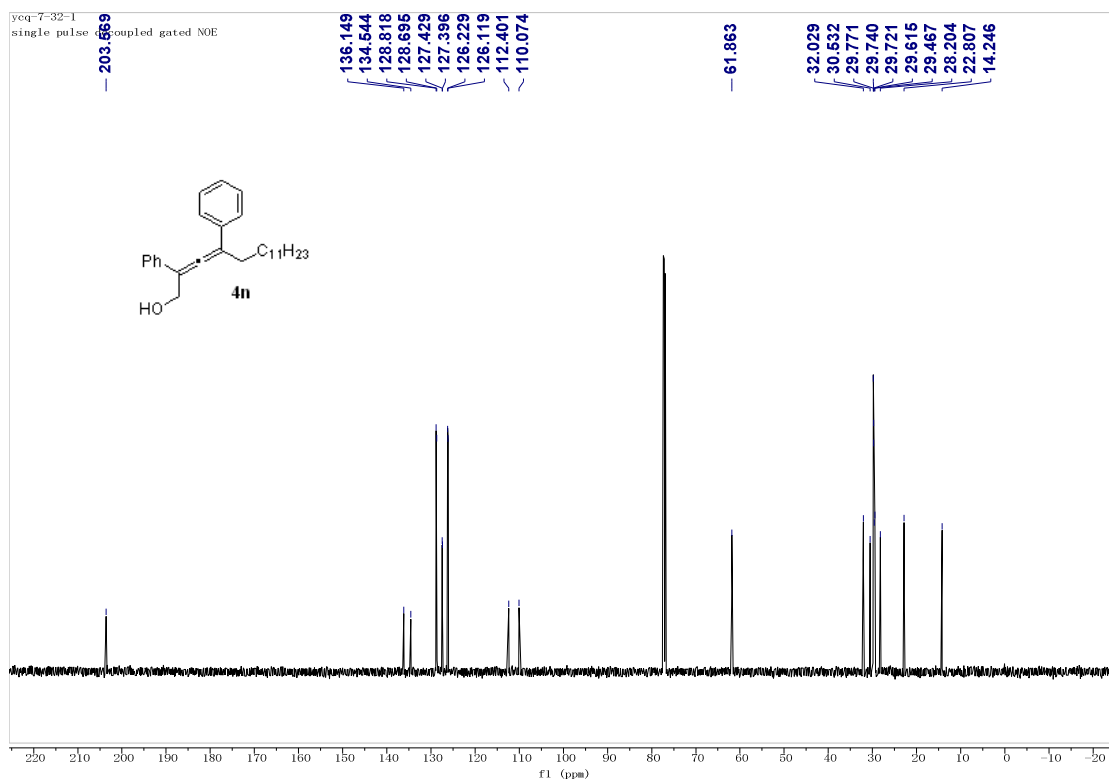



ycq-7-92-1.1.fid

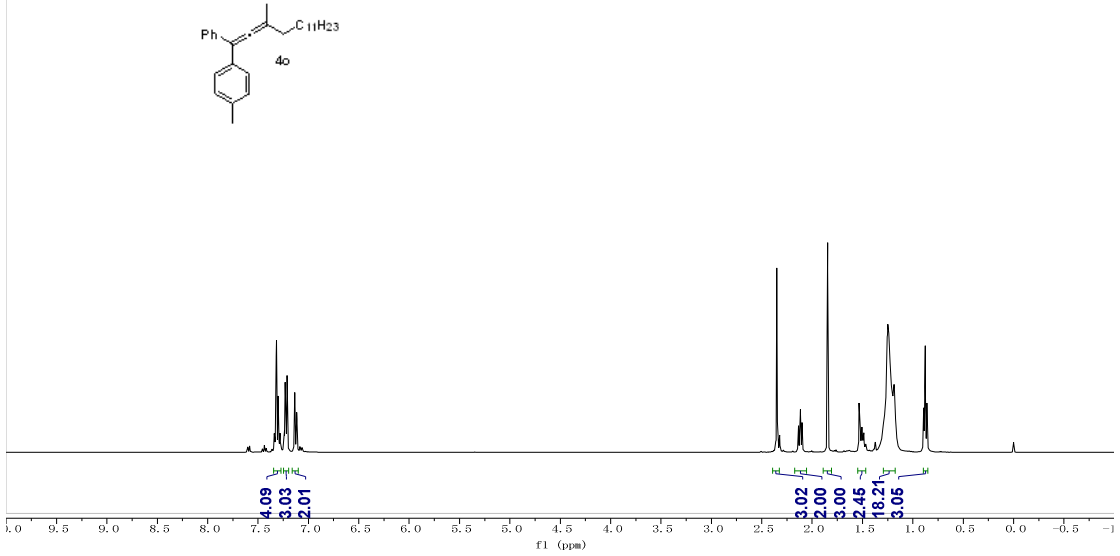

ycq-7-92-1.1.fid

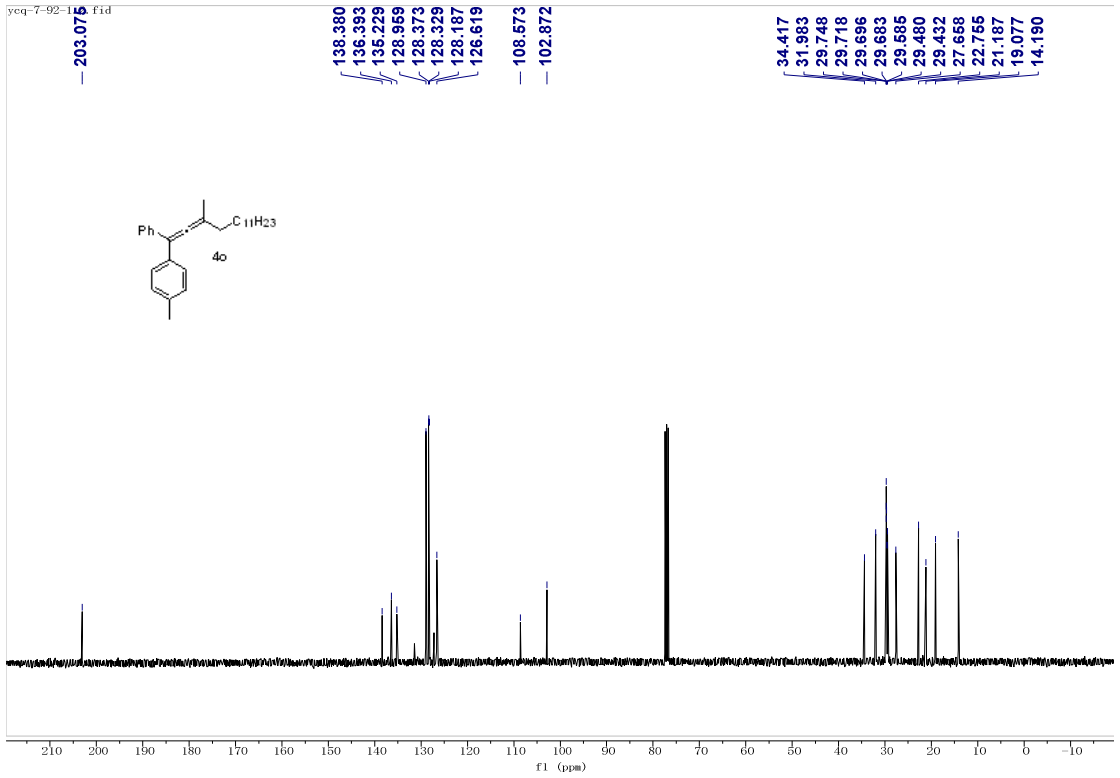

ycq-7-140-1.1.fid

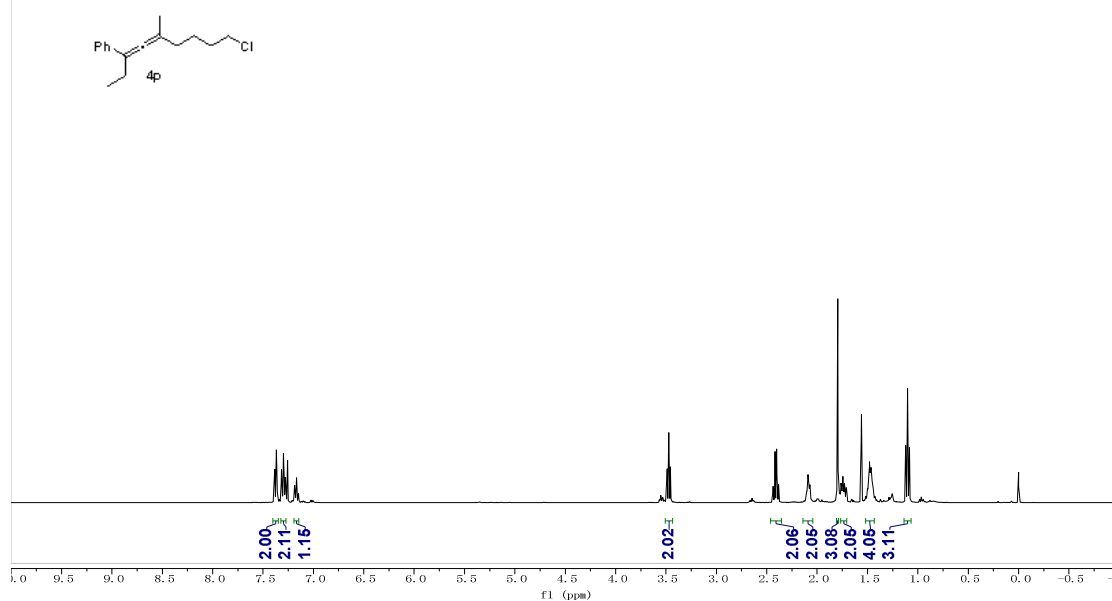

ycq-7-140-1.1.fid

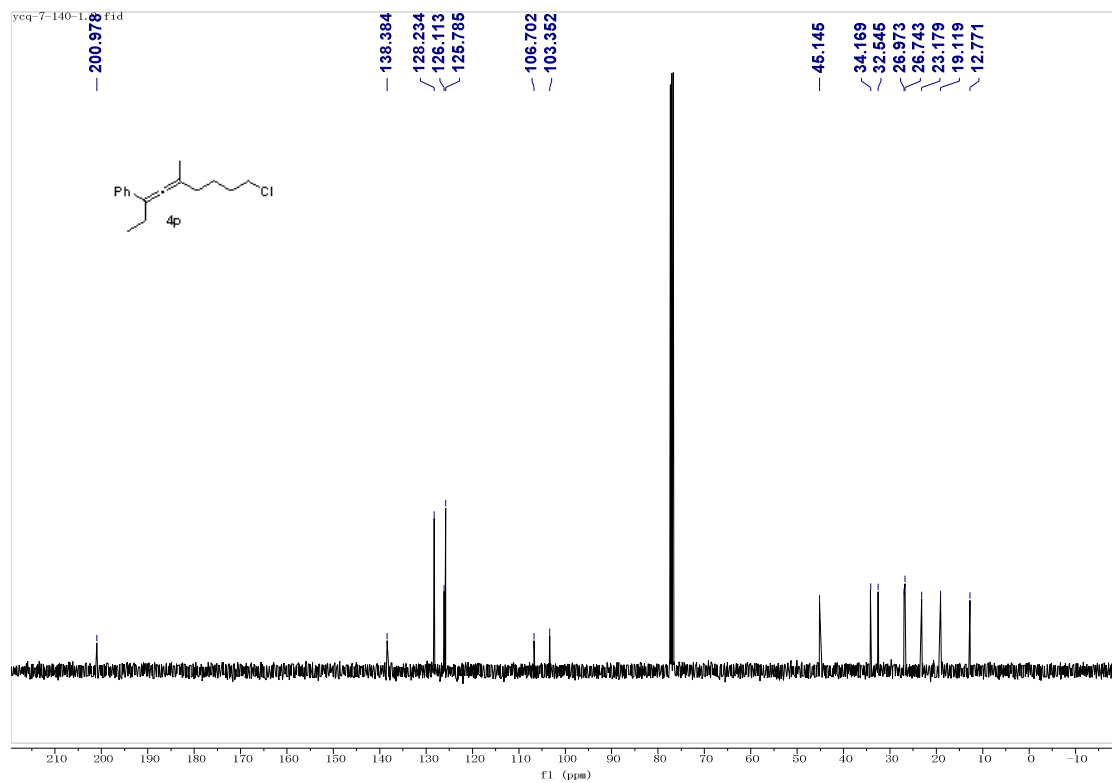

yeq-7-115-1-1.1.fid

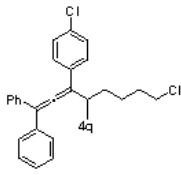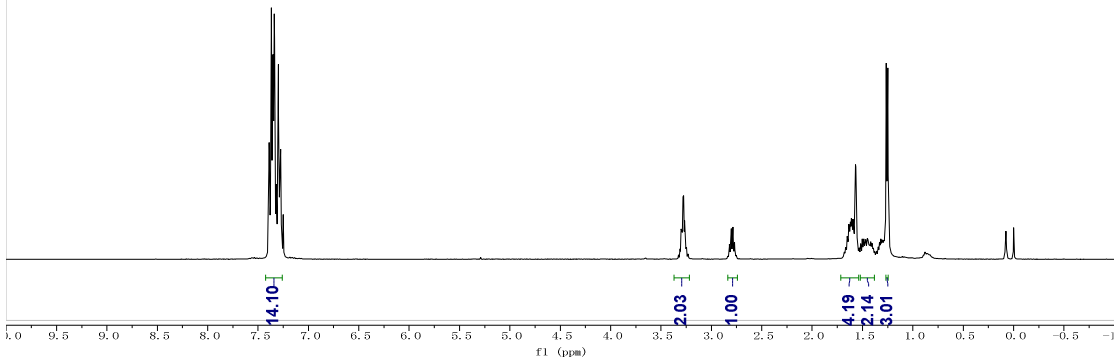

yeq-7-115-1-1.fid

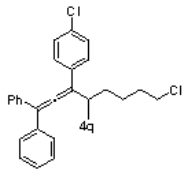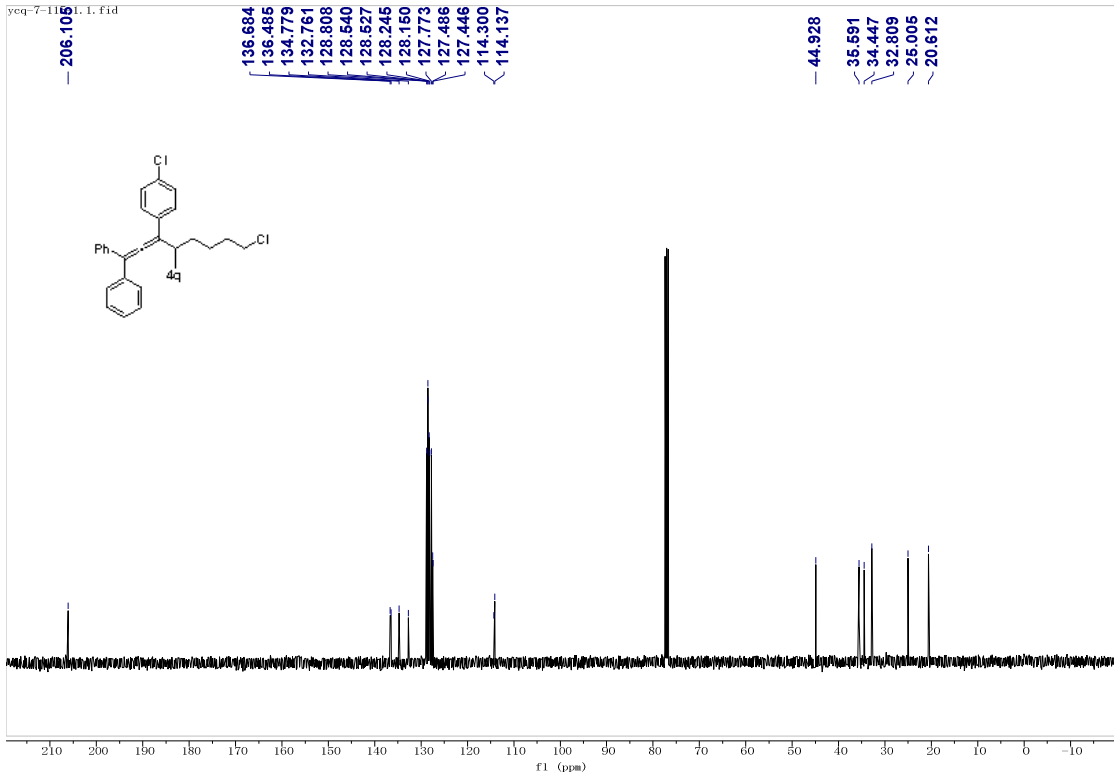

Y00-7-121-1.1.fid

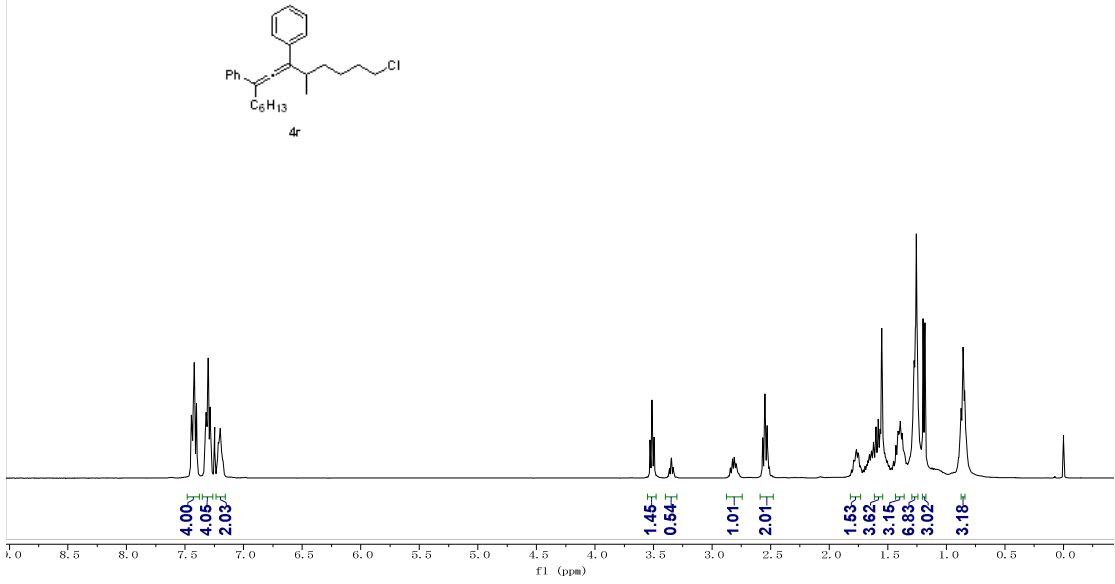

Y00-7-121-2.fid

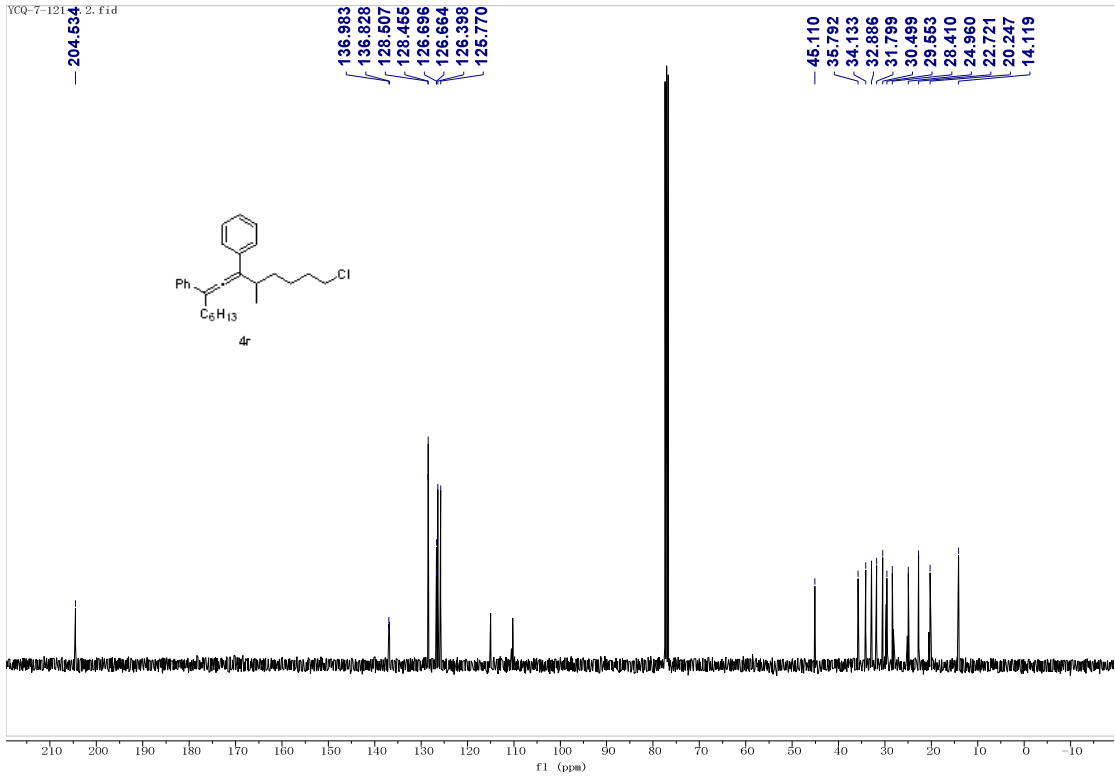

ycq-8-12-1. 1. fid

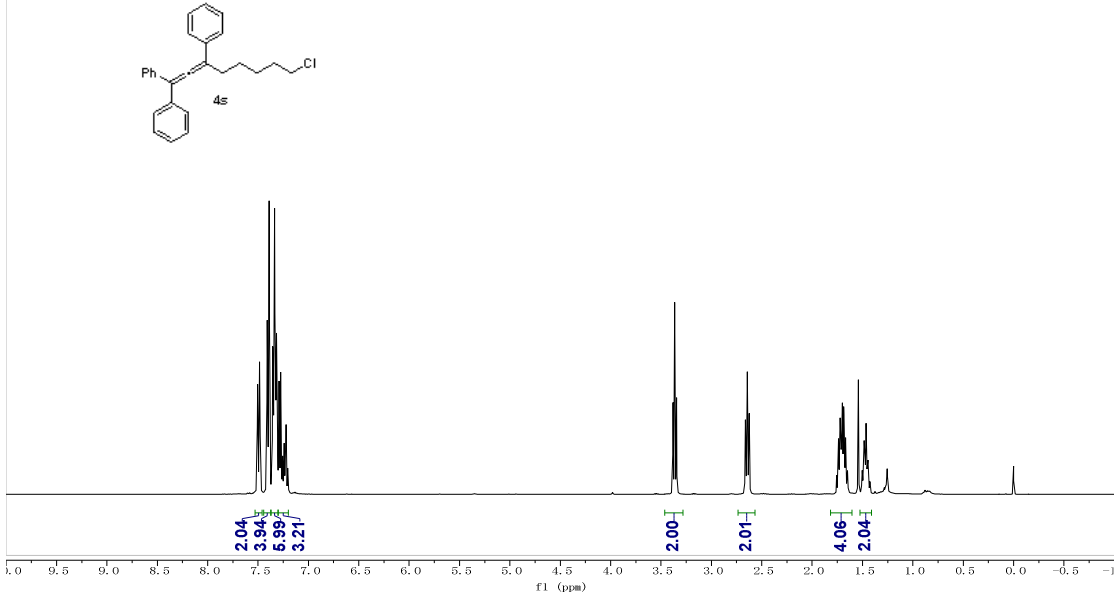

ycq-8-12-1. 2. fid

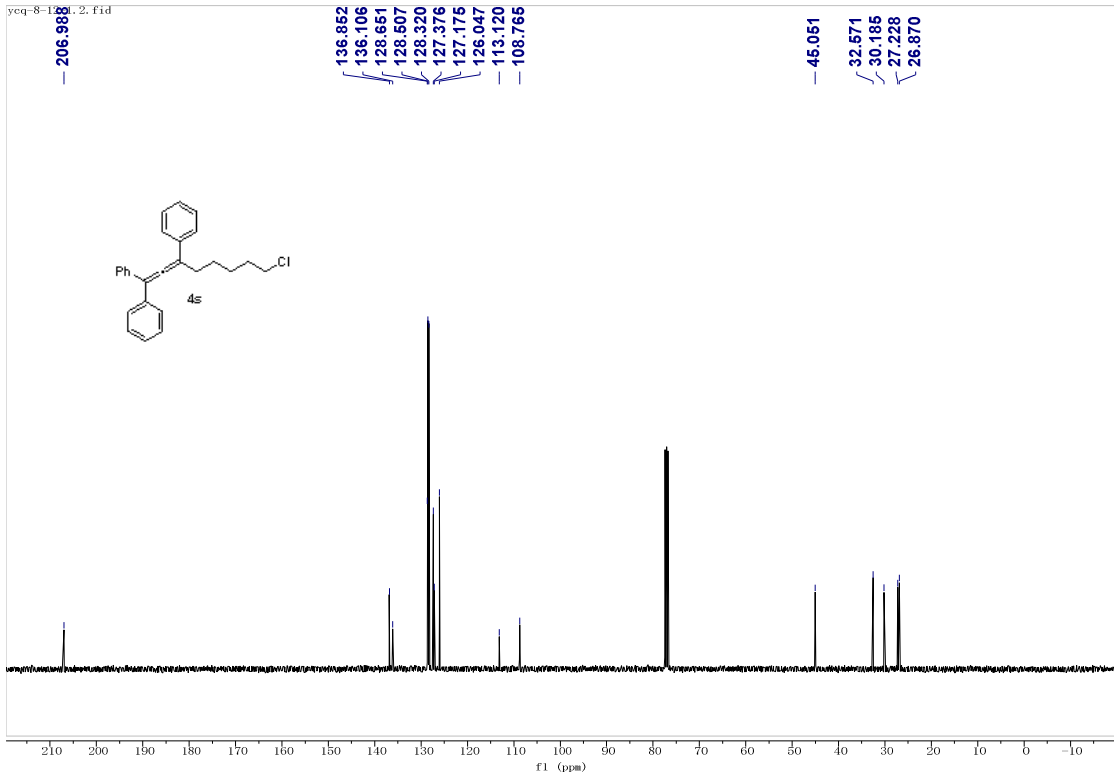

ycq-8-17-1.1.fid

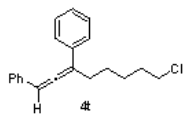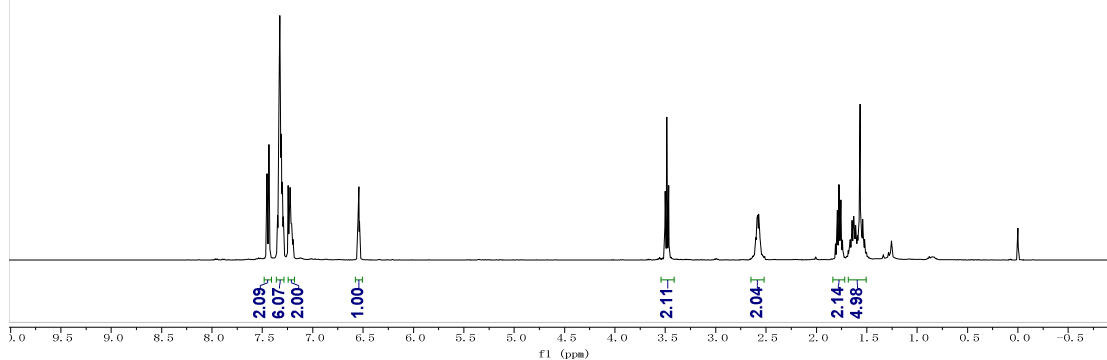

ycq-8-17-2.fid

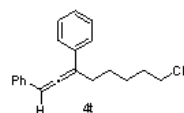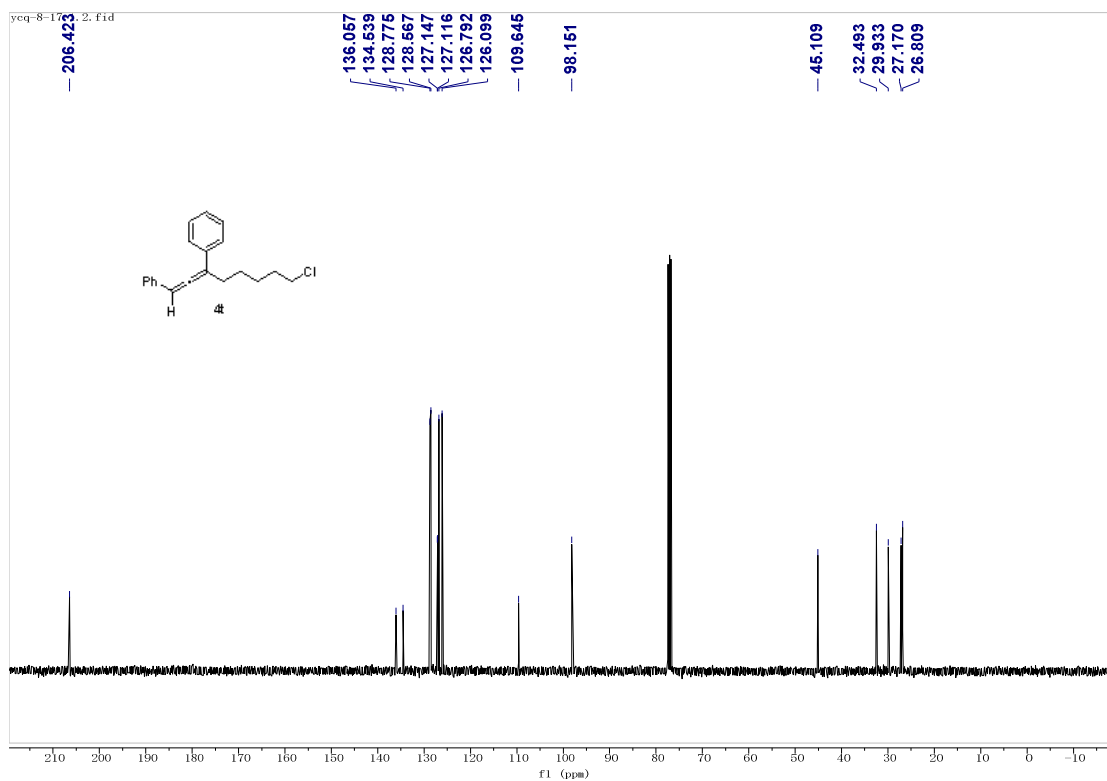

ycq-7-90-2.1.fid

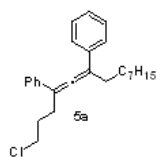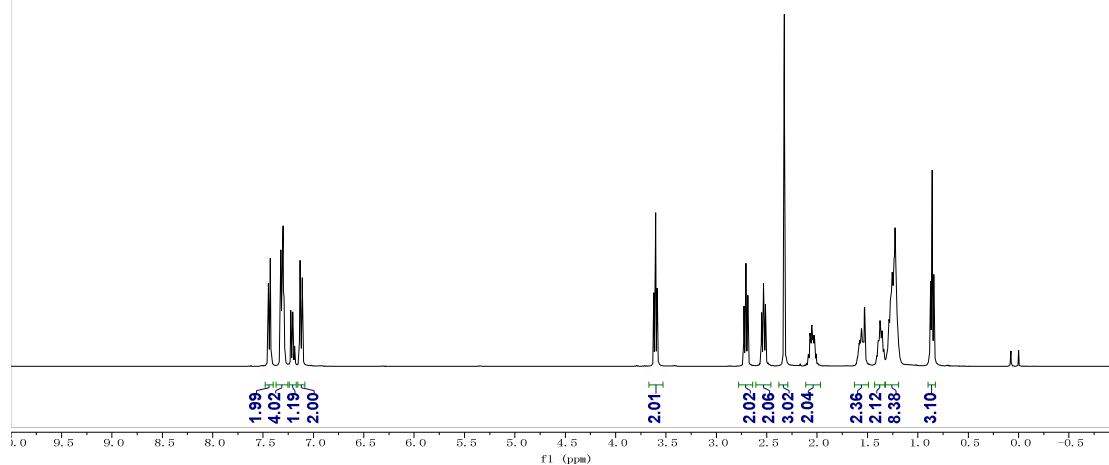

ycq-7-90-2.fid

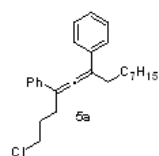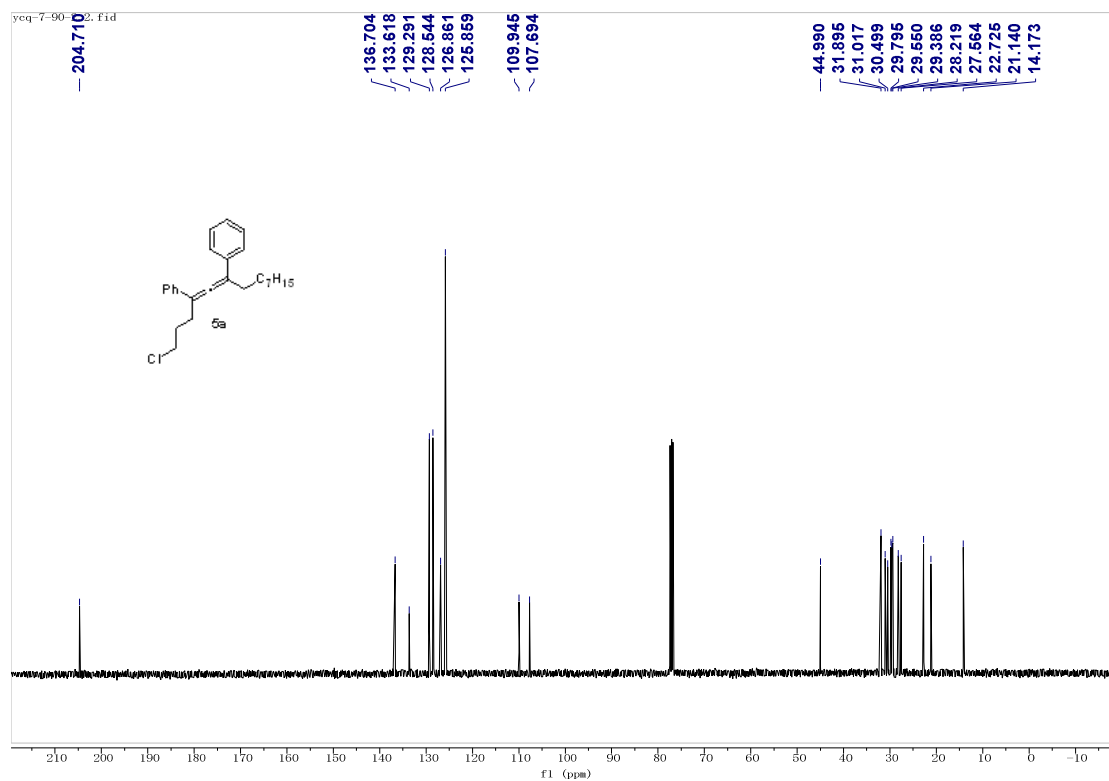

ycq-7-90-1.1.fid

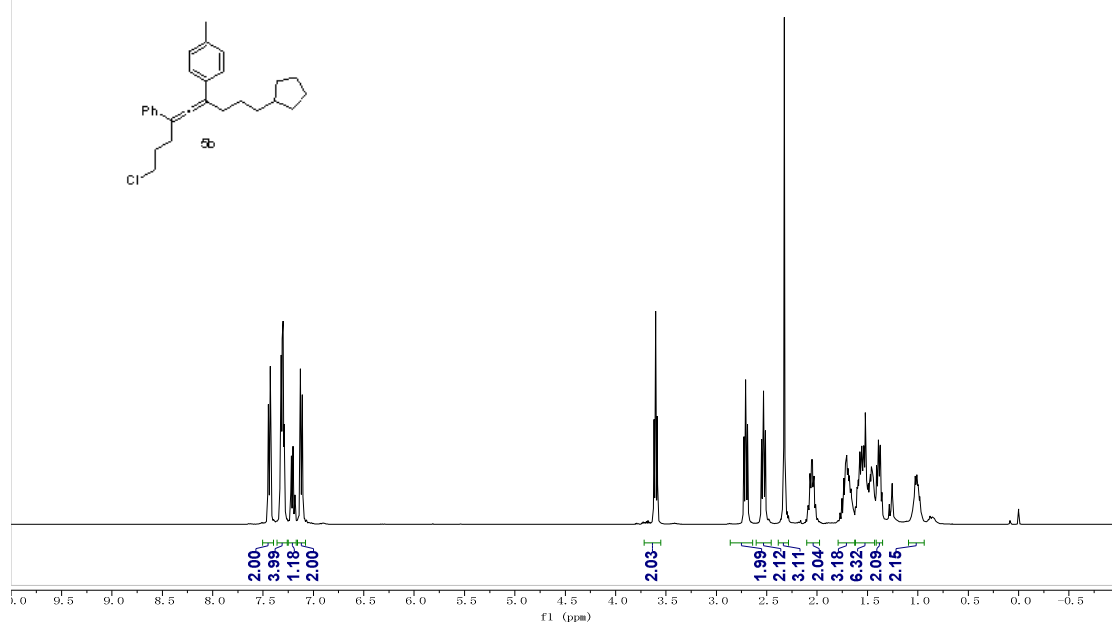

ycq-7-90-1.2.fid

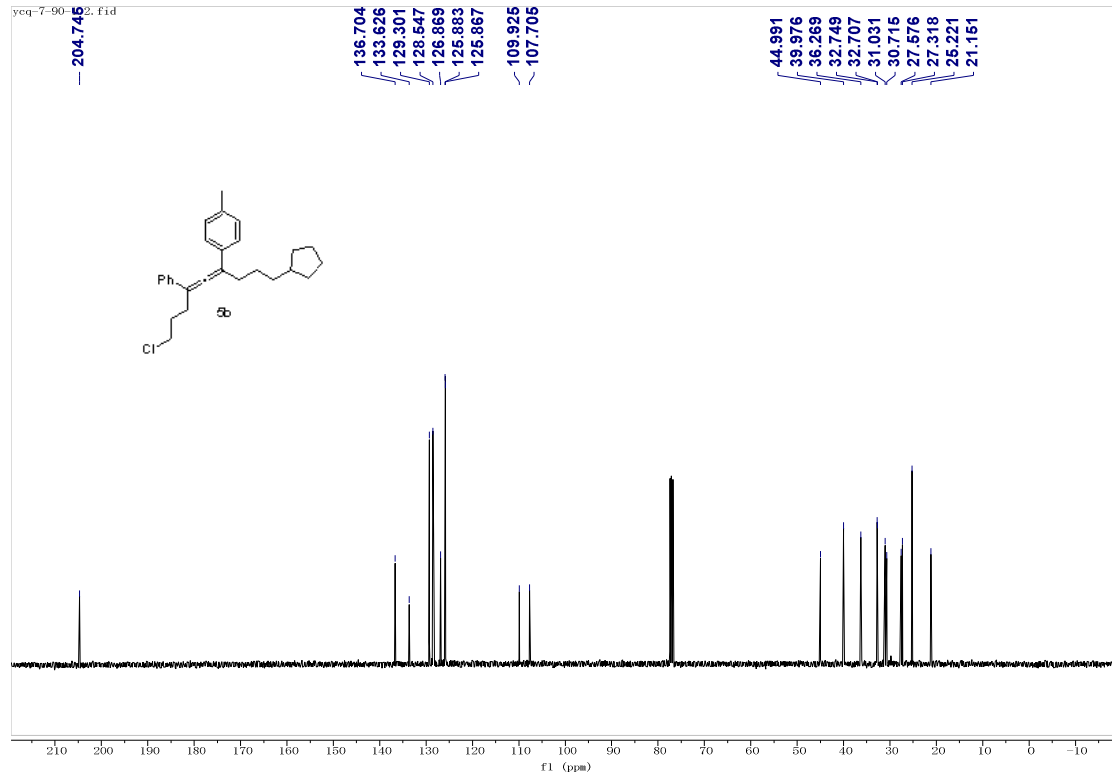



yeq-6-153-2  
single\_pulse

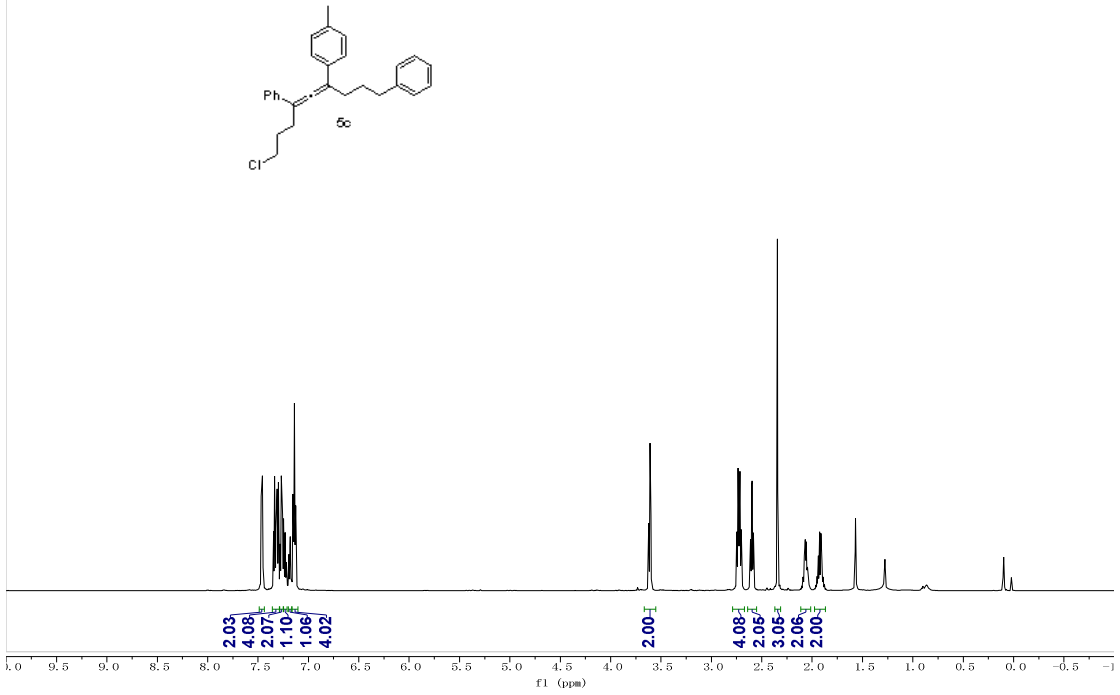

yeq-6-153-2  
single\_pulse

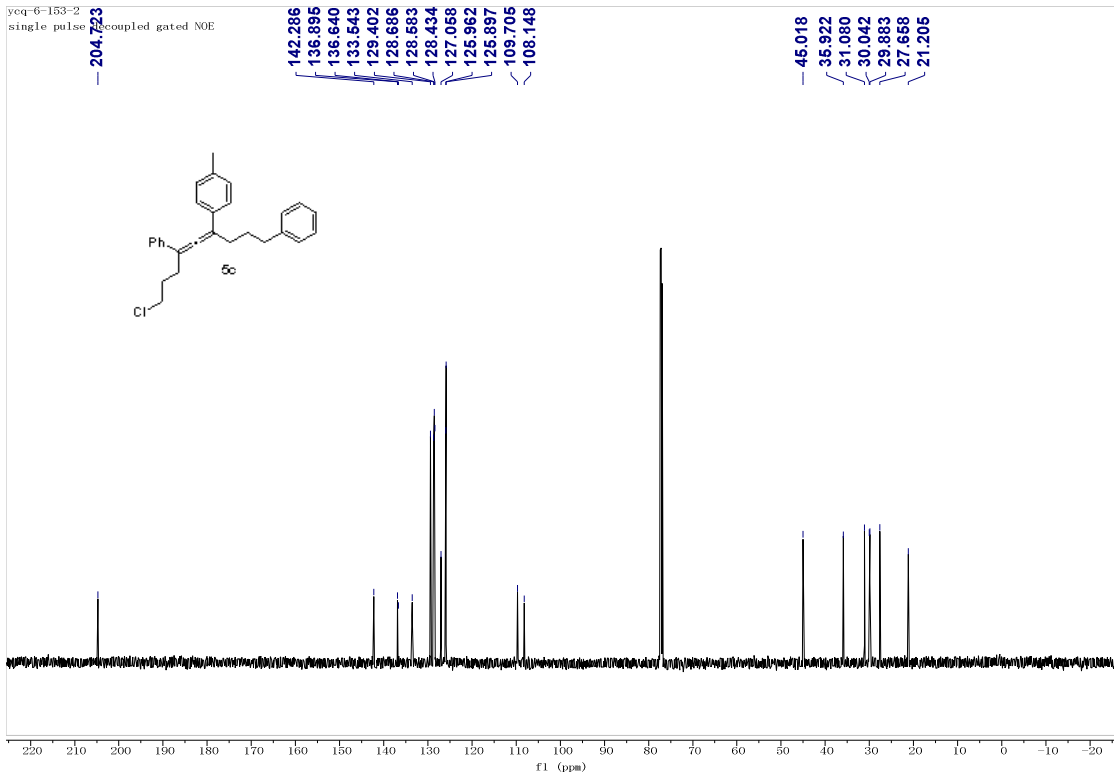

yeq-5d.1.fid

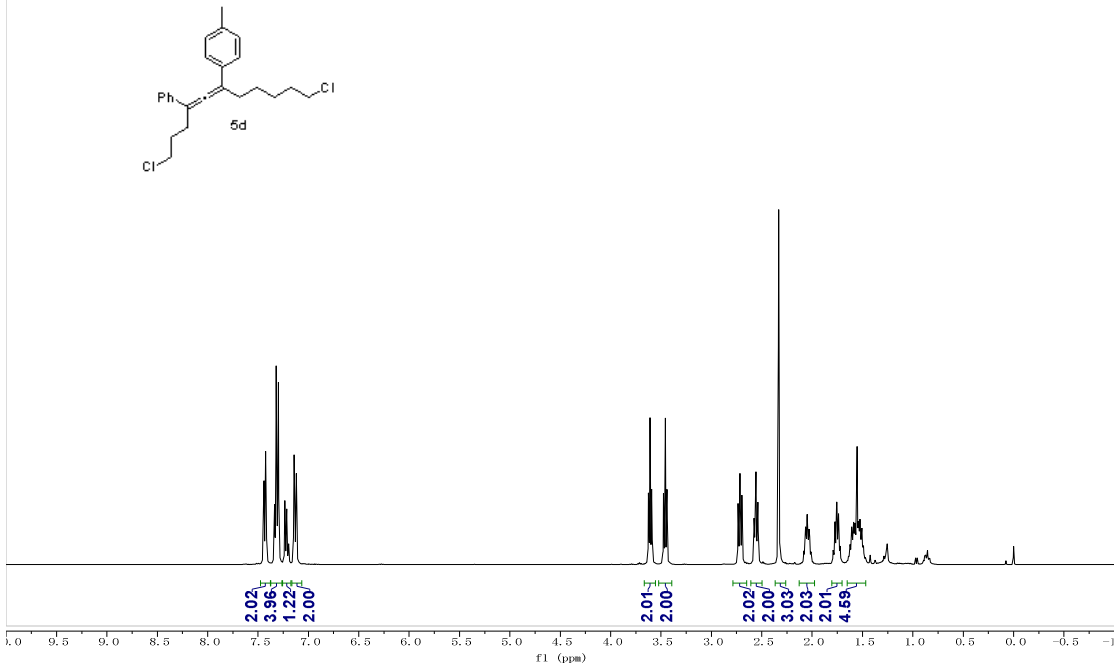

yeq-5d.2.

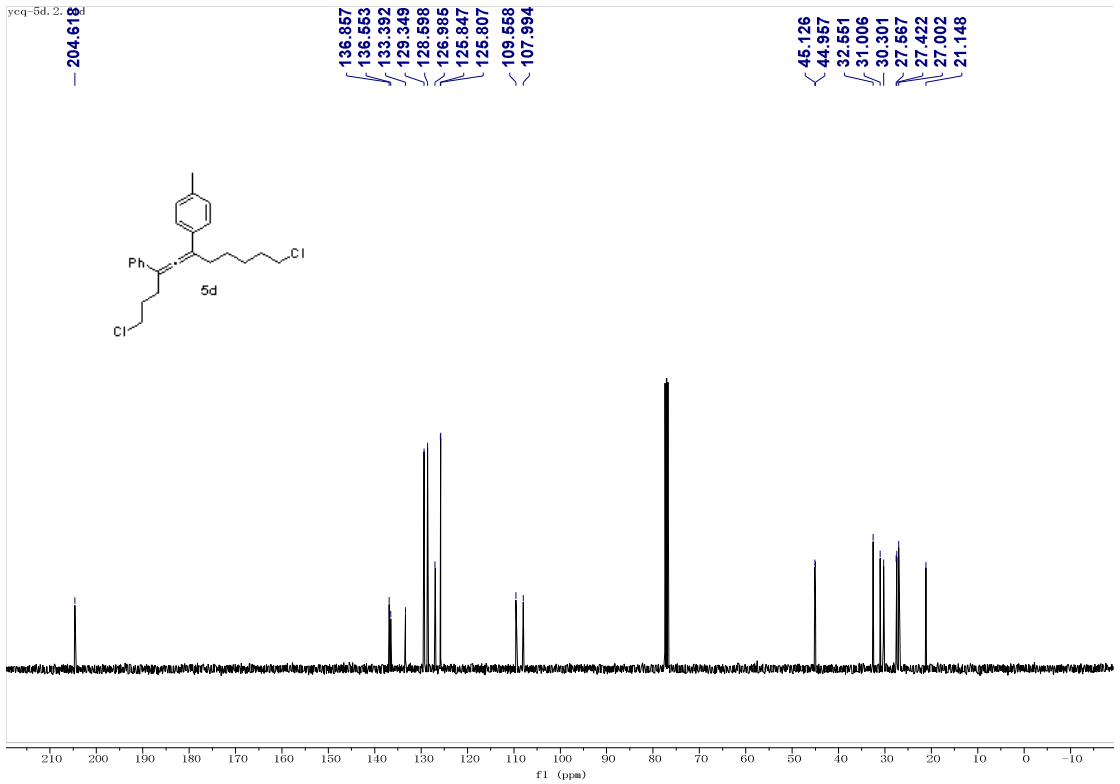

yeq-7-104-1.1.fid

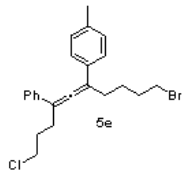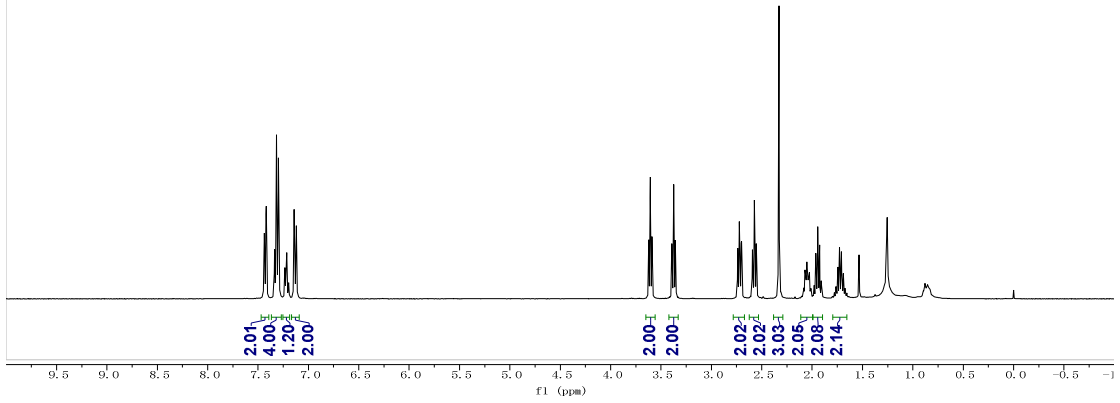

yeq-7-10400 2.fid

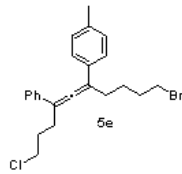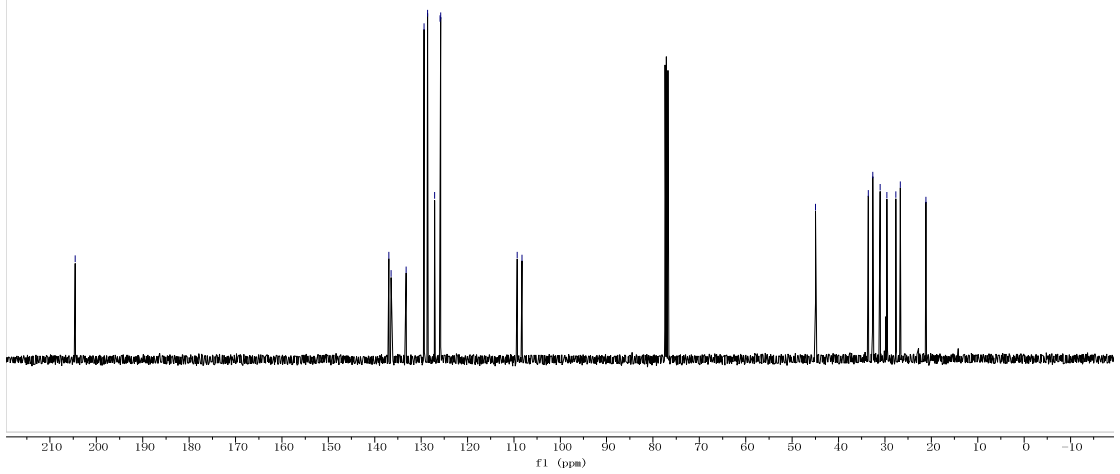

ycq-6-130-2  
single\_pulse

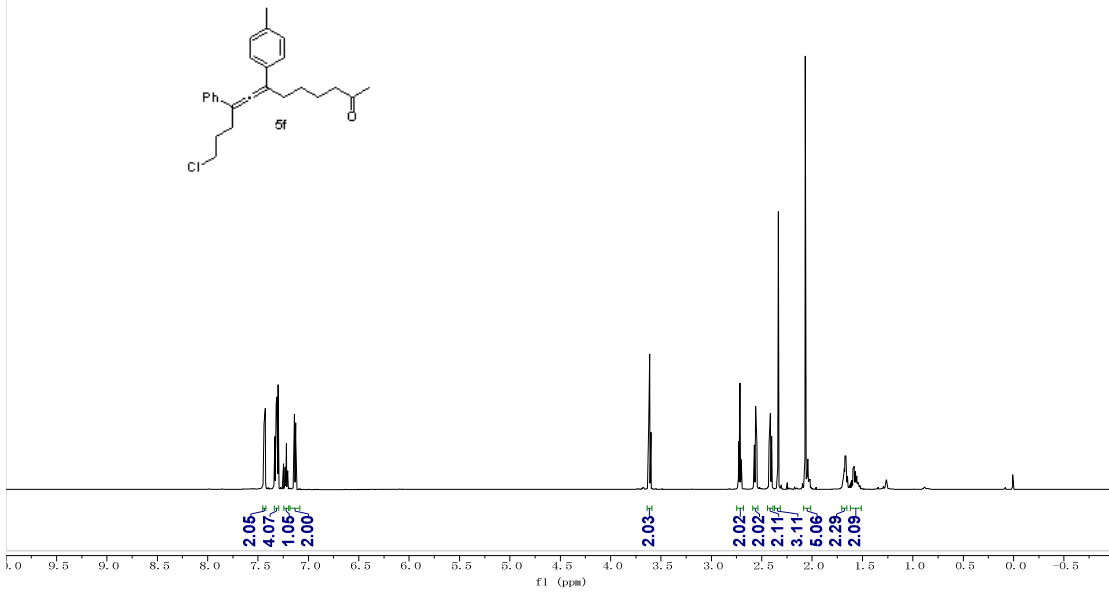

ycq-6-130-2  
single\_pulse coupled gated NOE

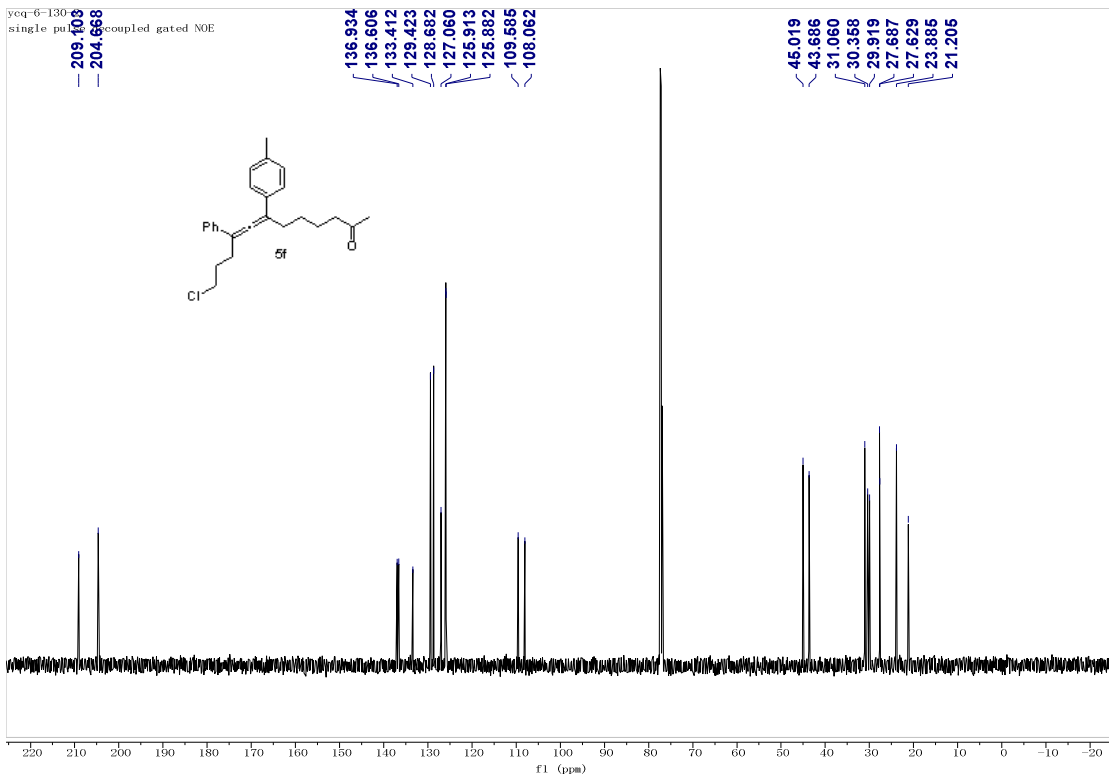

ycq-130-1  
single\_pulse

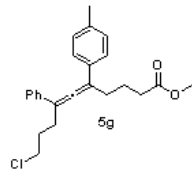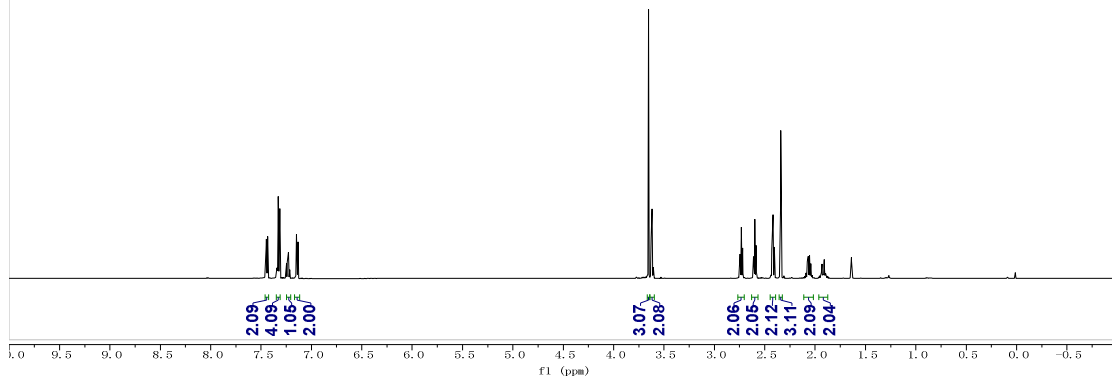

ycq-130-1  
single\_pulse

204.618

173.989

137.009

136.472

133.246

129.445

128.688

127.119

126.969

126.881

109.213

108.437

61.674

45.007

33.879

31.067

29.837

27.682

23.494

21.205

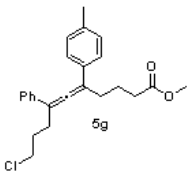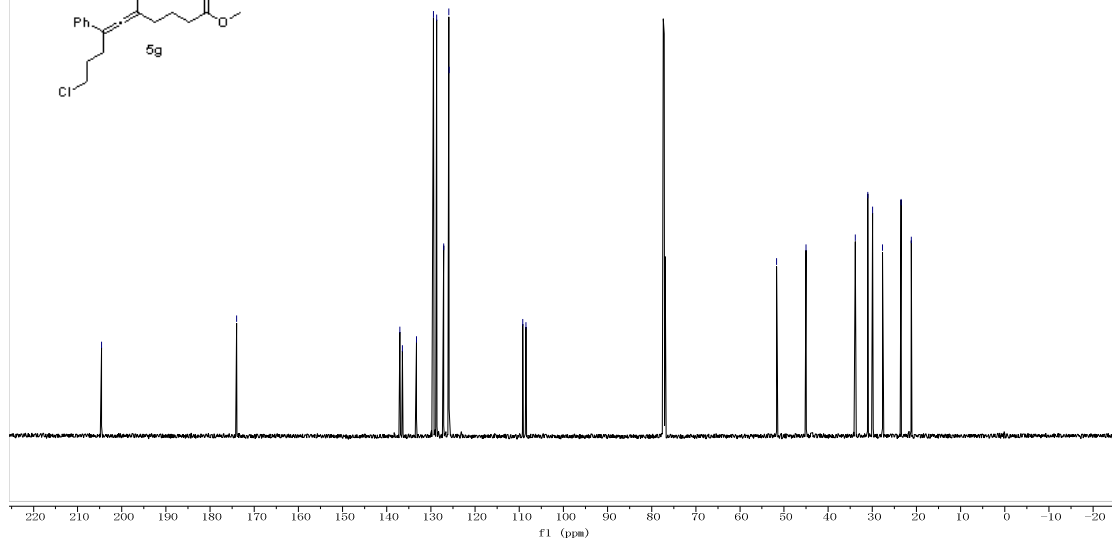

ycq-6-130-3-1  
single\_pulse

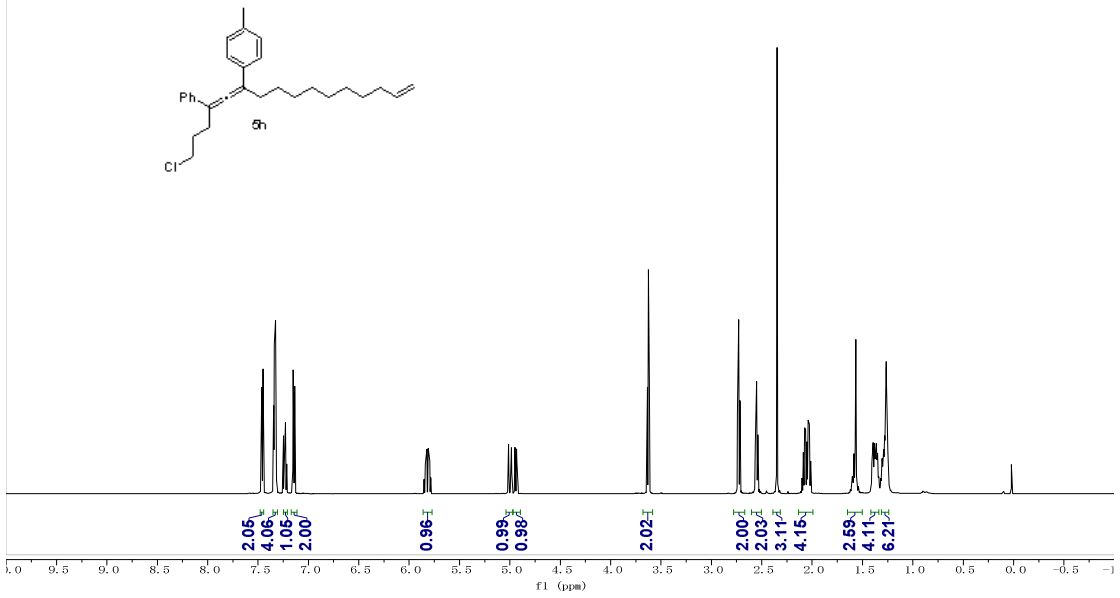

ycq-6-130-3-1  
single\_pulse coupled gated NOE

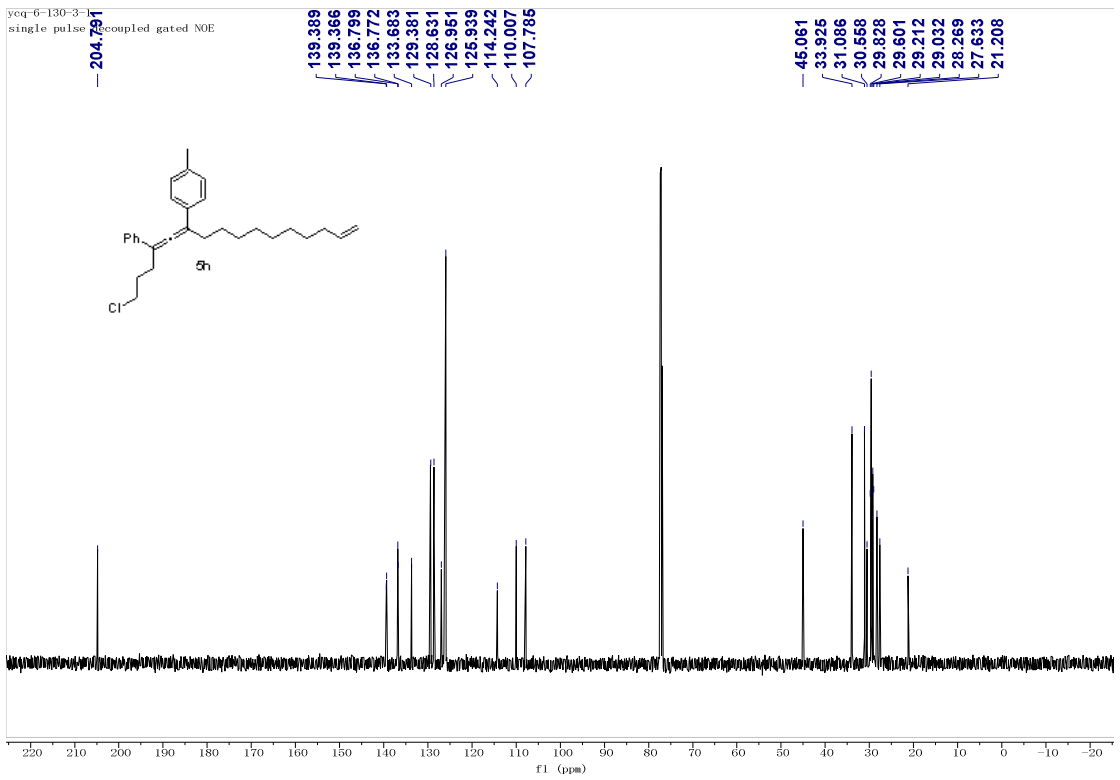

yeq-7-117-1.1.fid

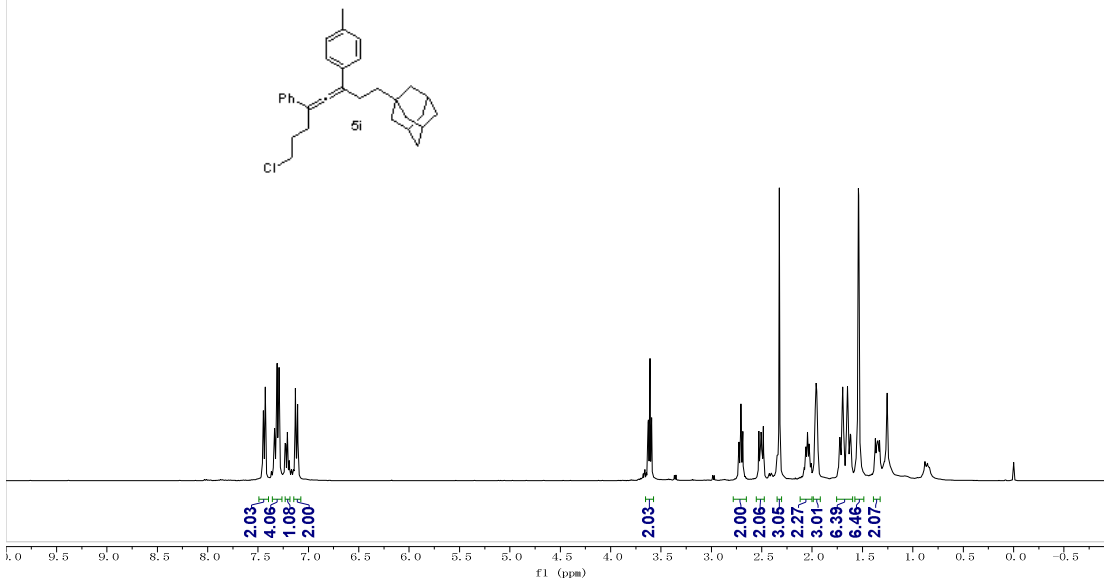

yeq-7-117-2.fid

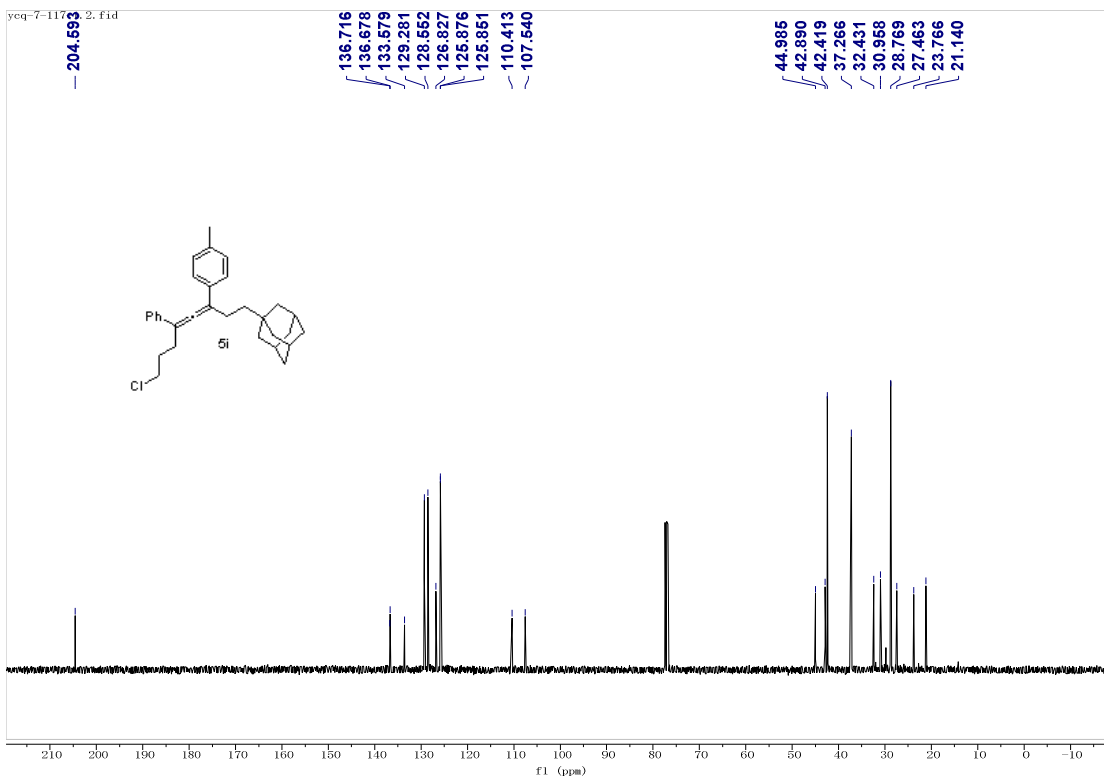

ycq-6-146-4 1  
single\_pulse

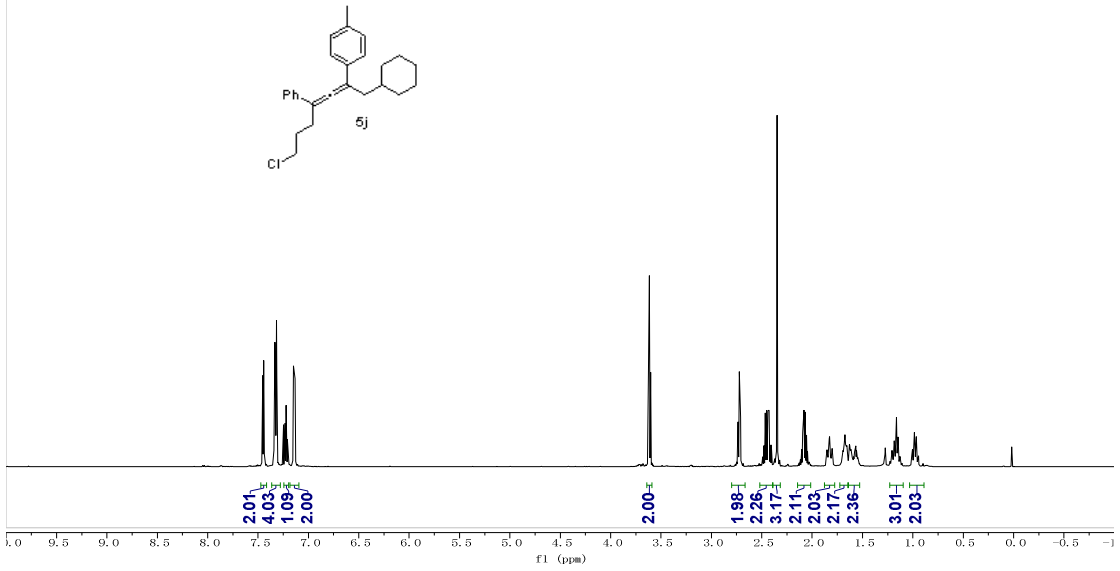

ycq-6-146-4  
single\_pulse decoupled gated NOE

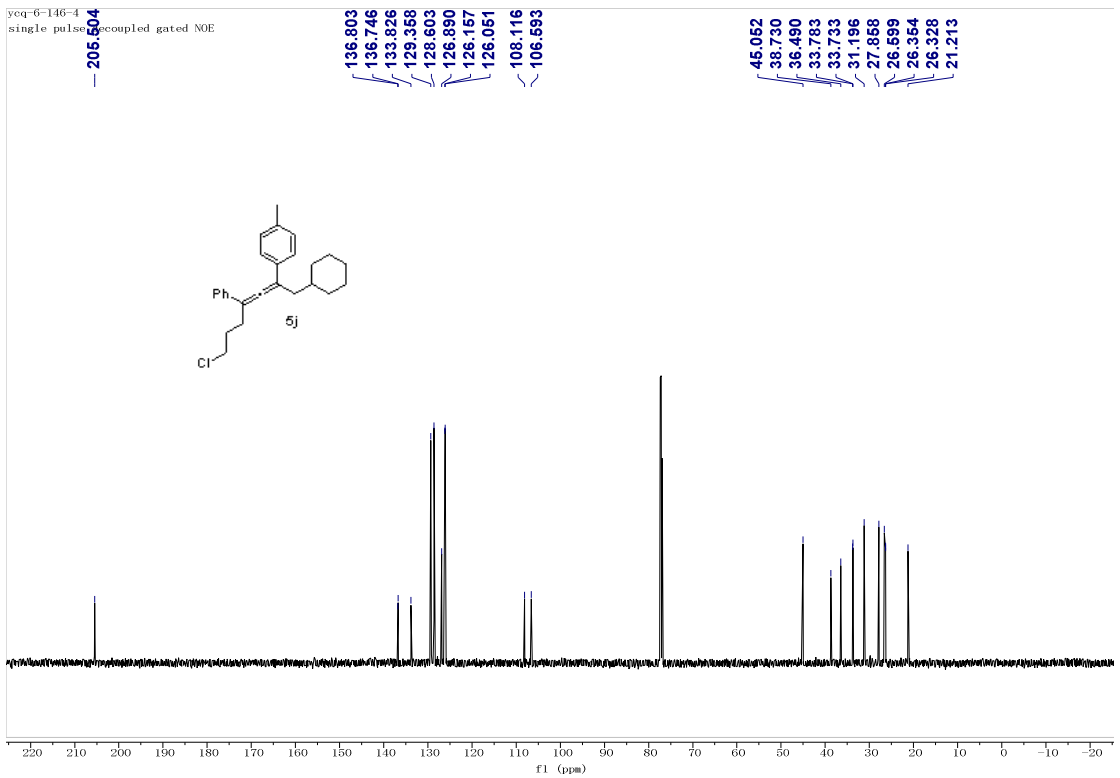



yeq-7-90-3.1.fid

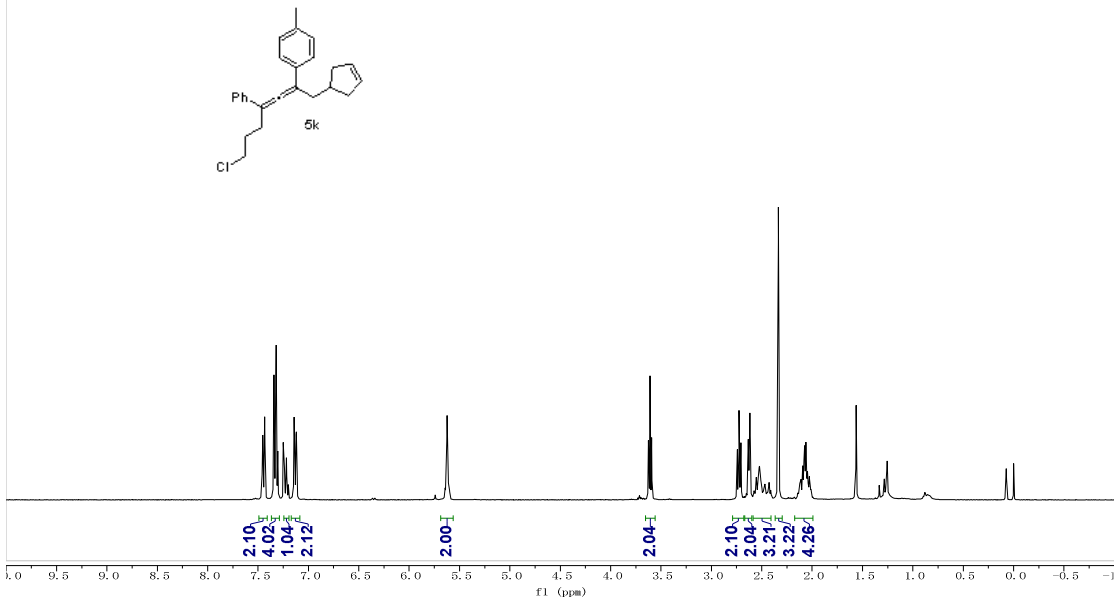

yeq-7-90-3.2.fid

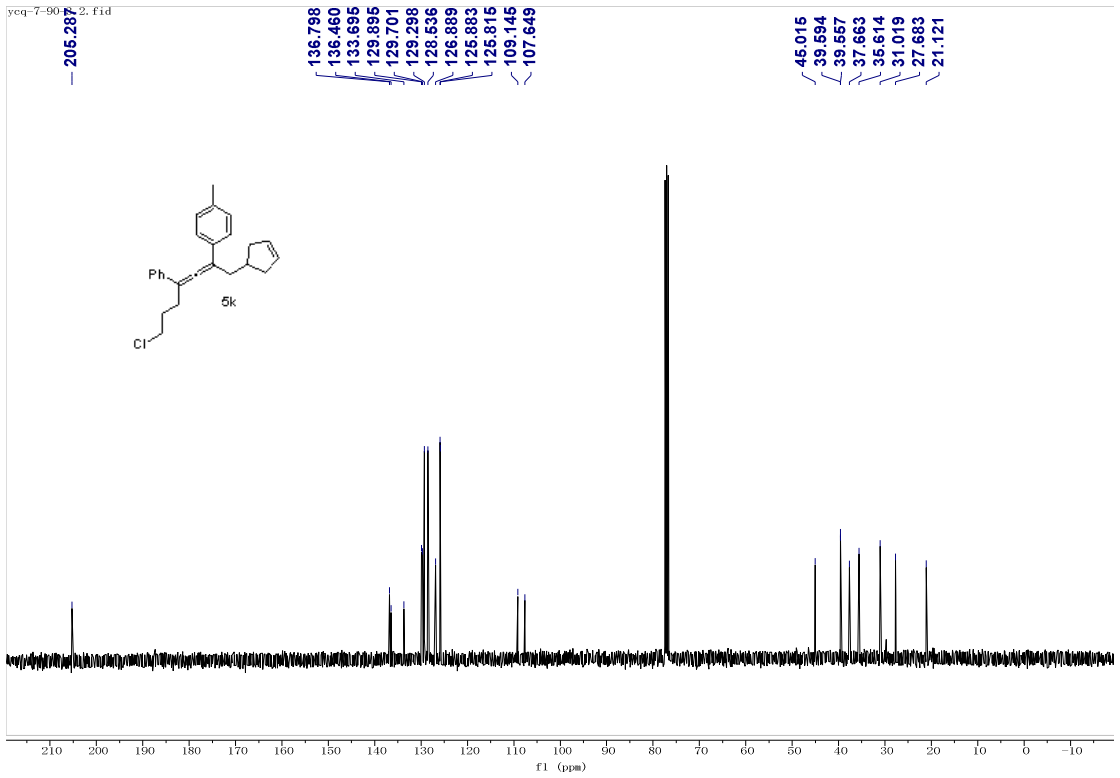

ycq-7-61-3  
single\_pulse

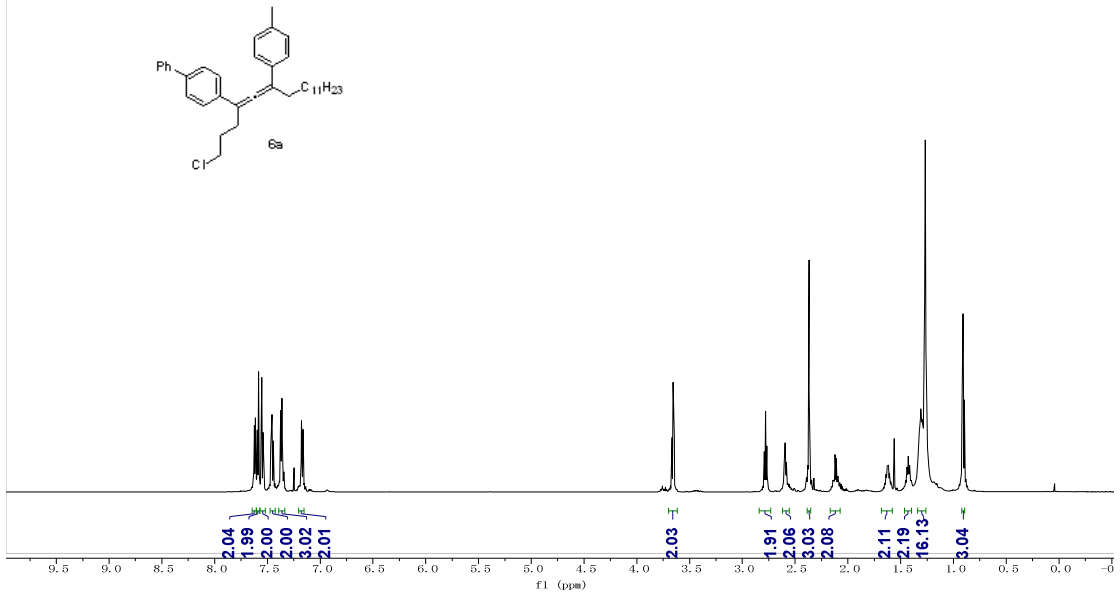

YCQ-7-61-3  
single\_pulse decoupled gated NOE

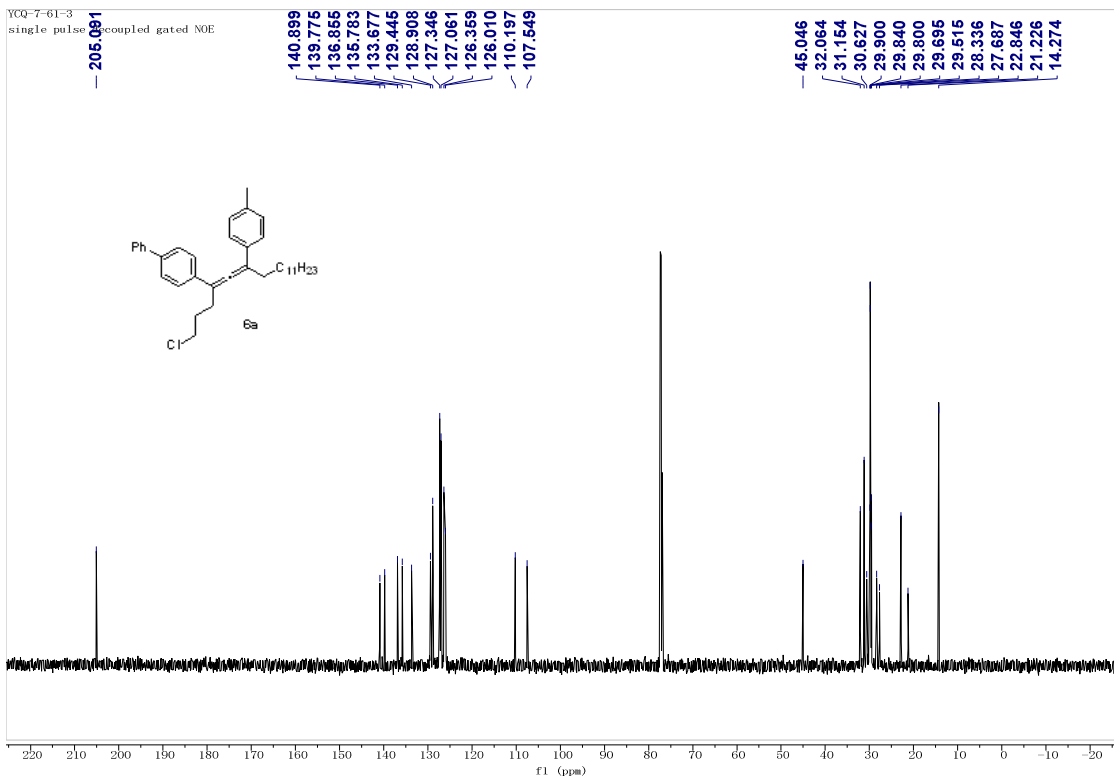

ycq-7-103-1.1.fid

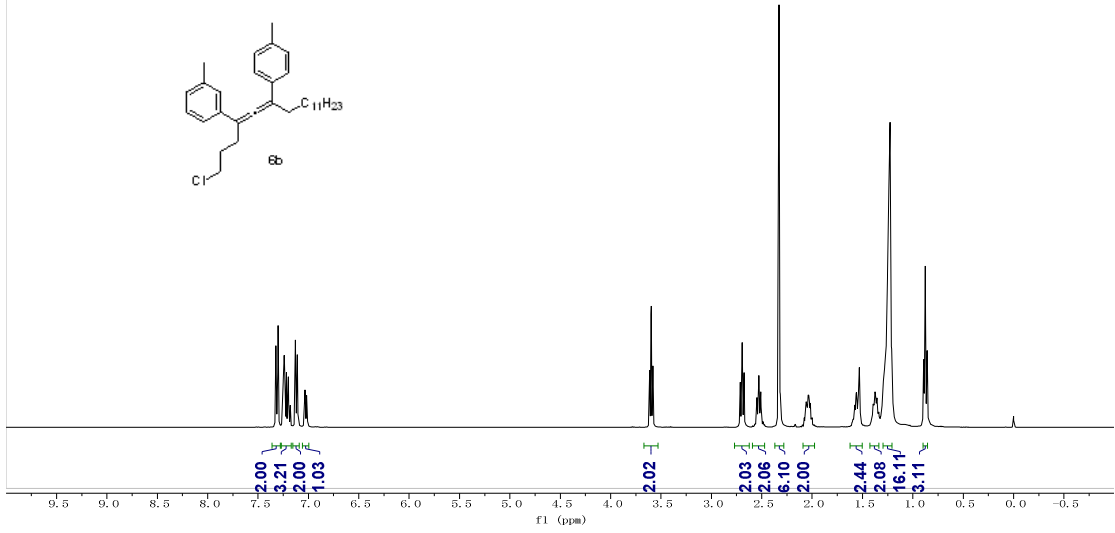

ycq-7-103-1.2.fid

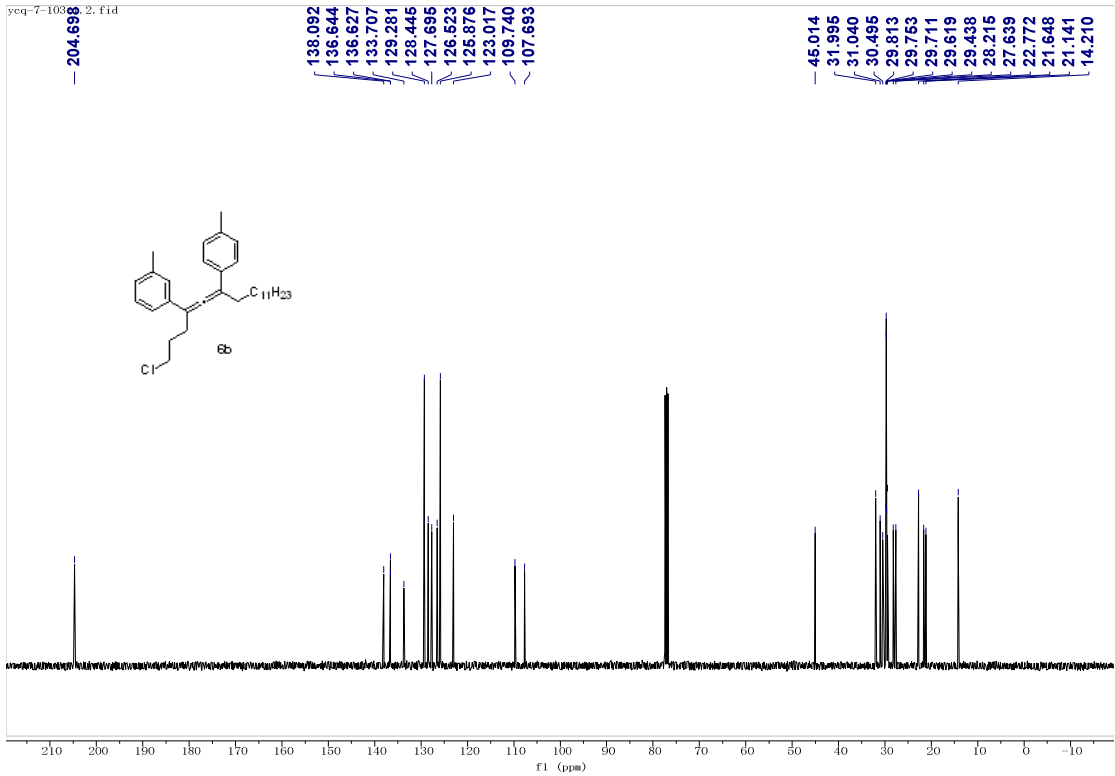

yeq-7-118-1.2.fid

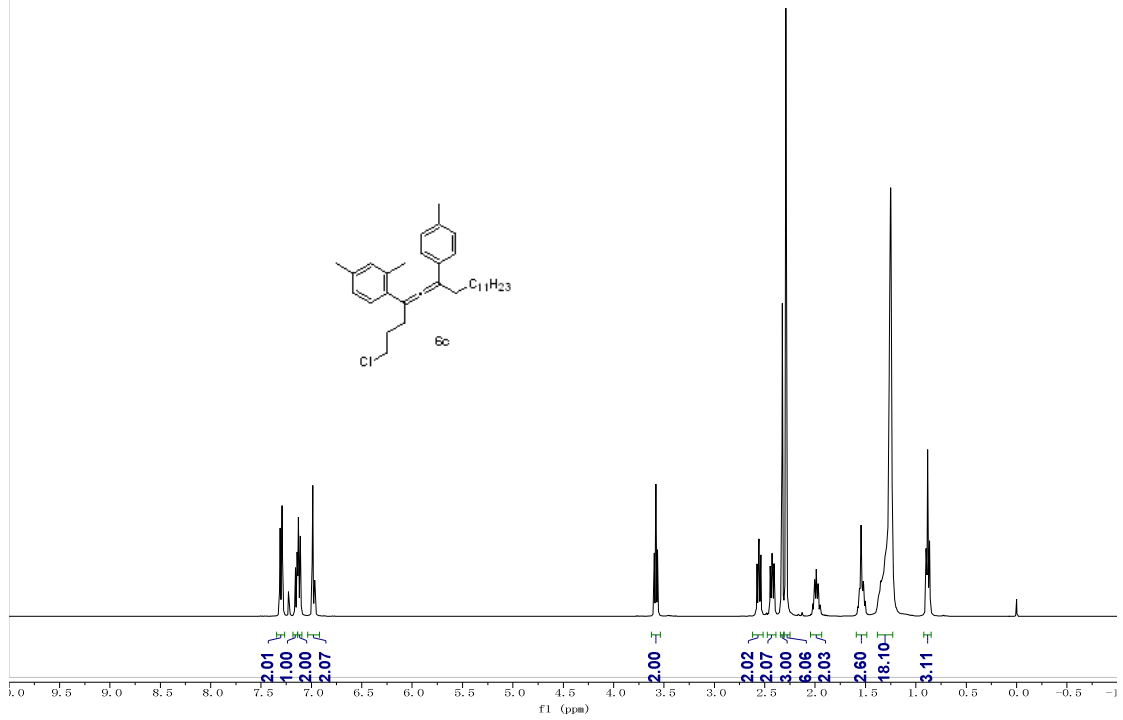

yeq-7-118-1.2.fid

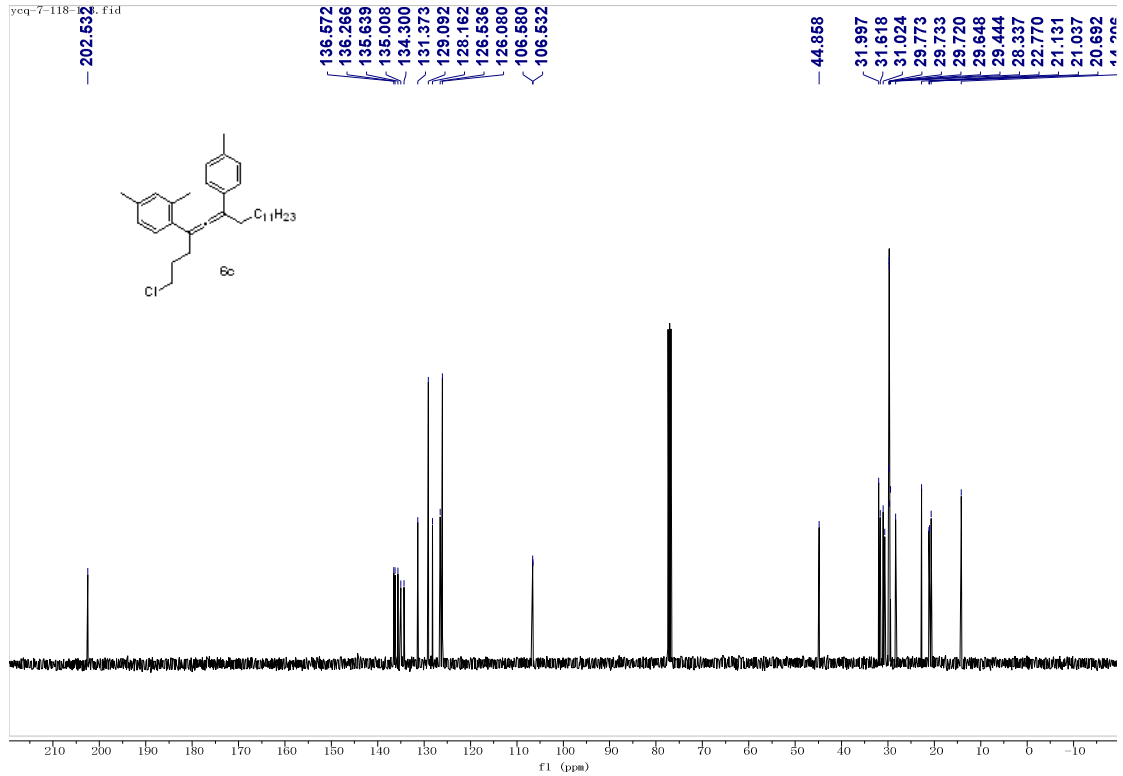

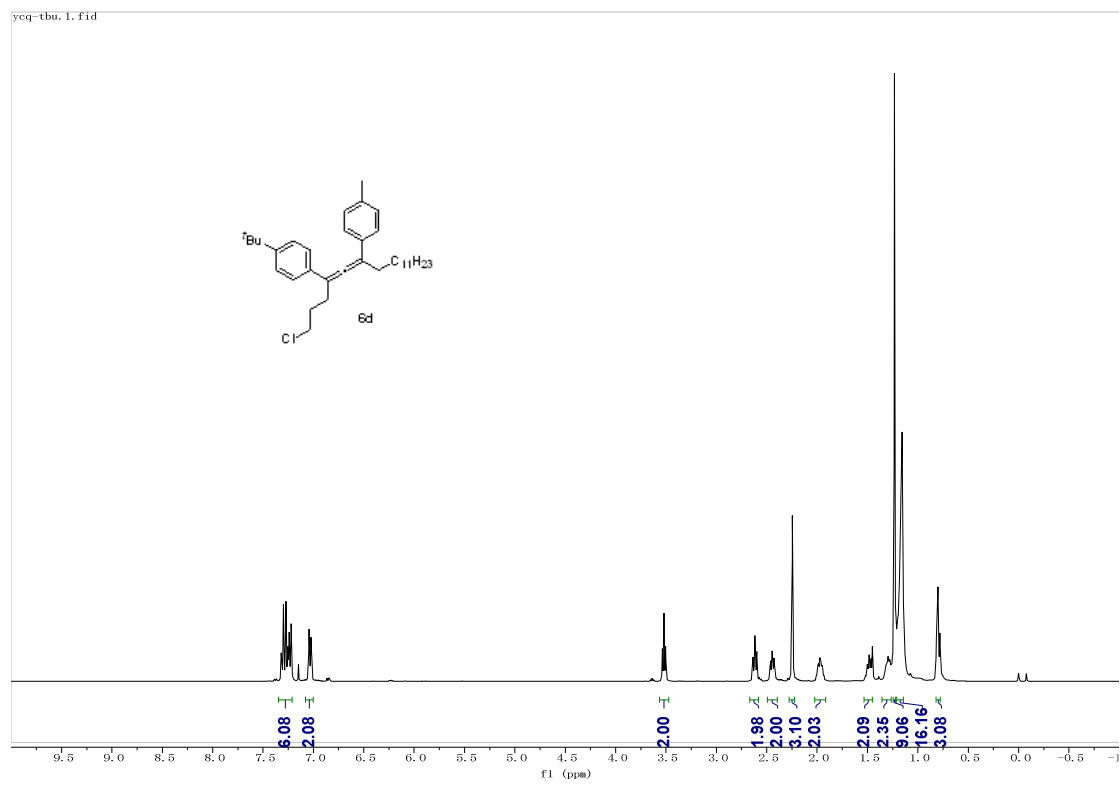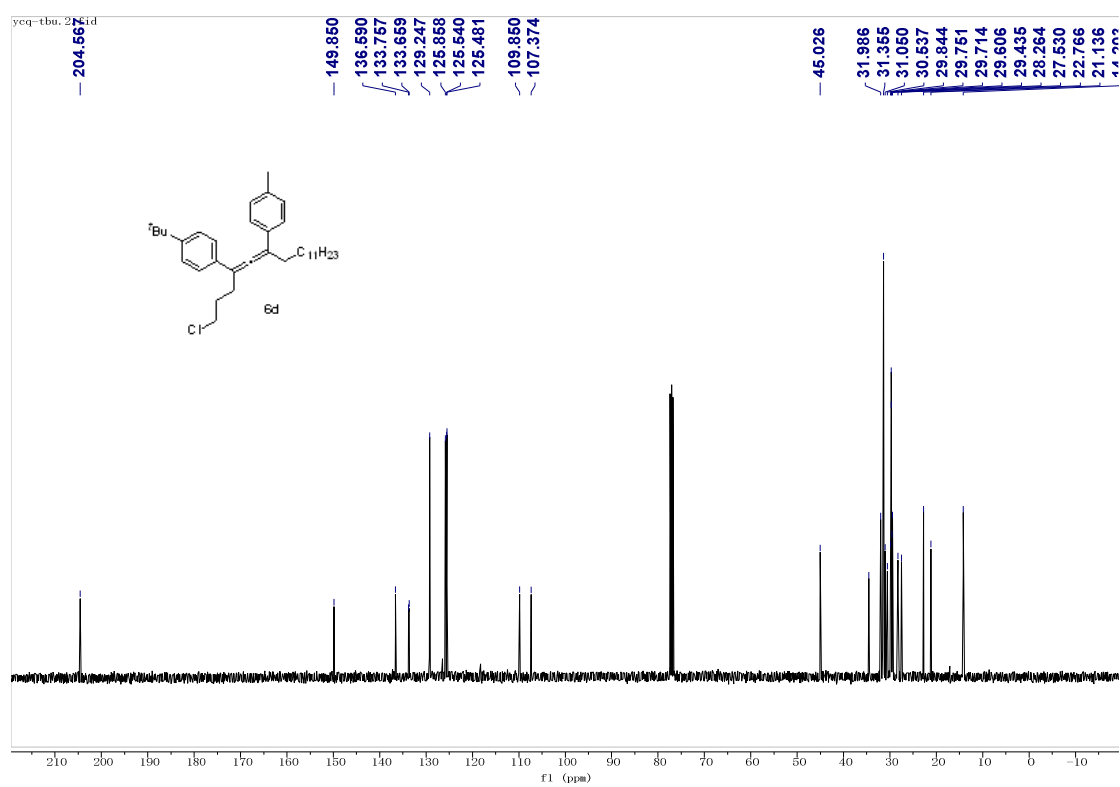

ycq-7-80-1.1.fid

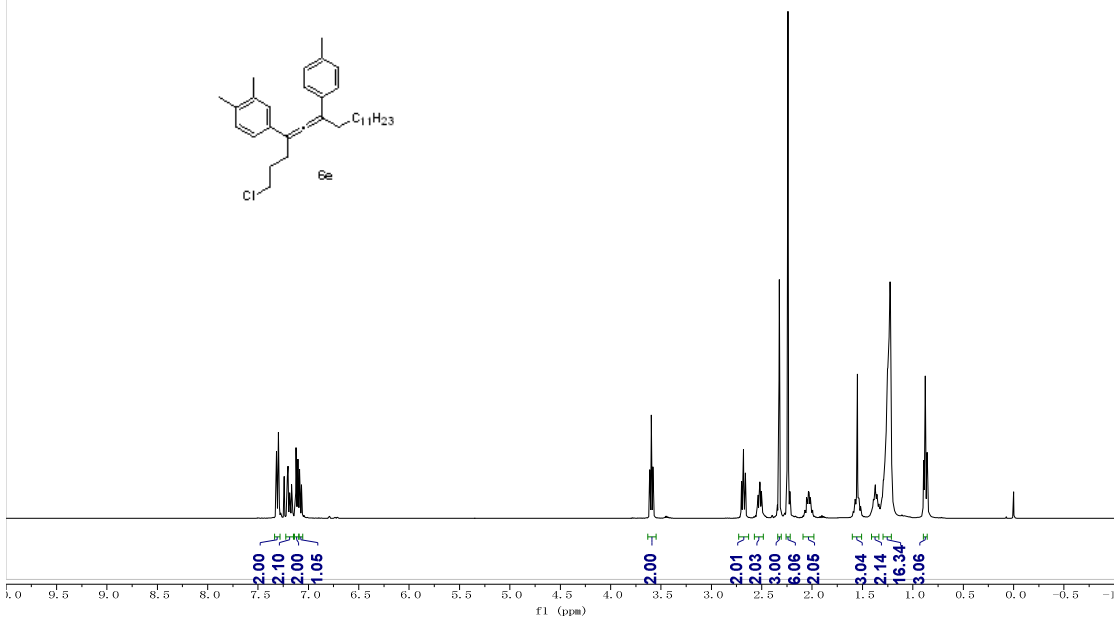

ycq-7-91-2.fid

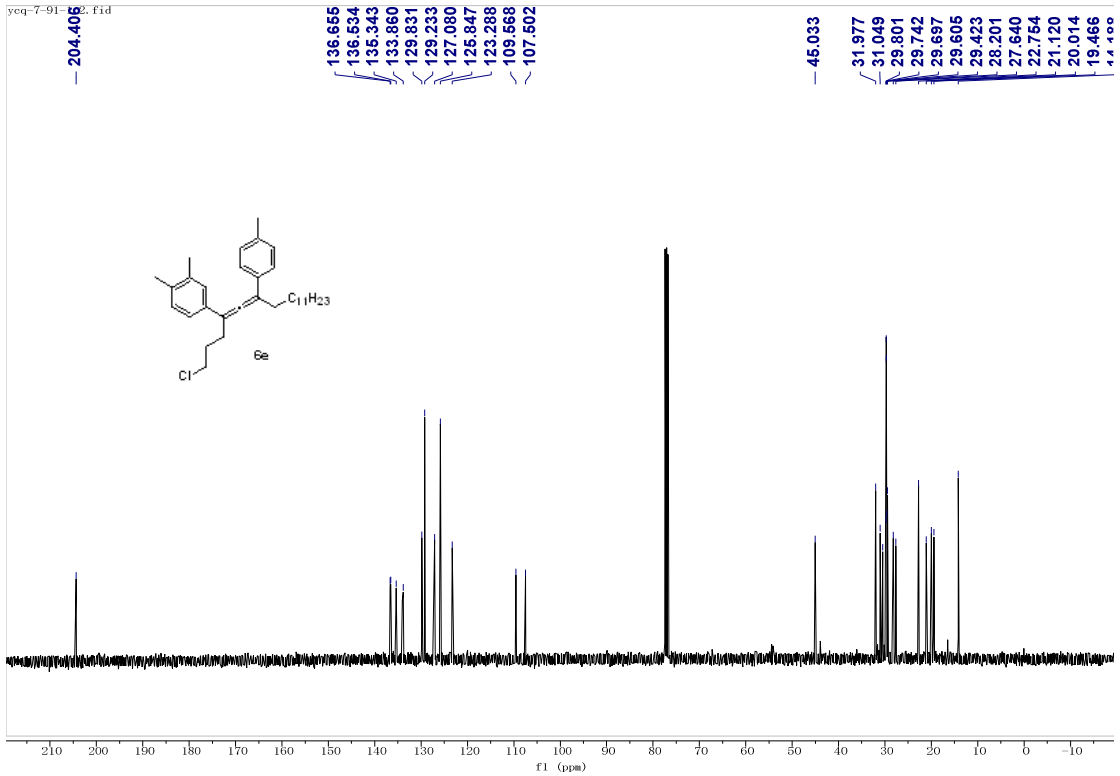

yeq-7-103-2.1.fid

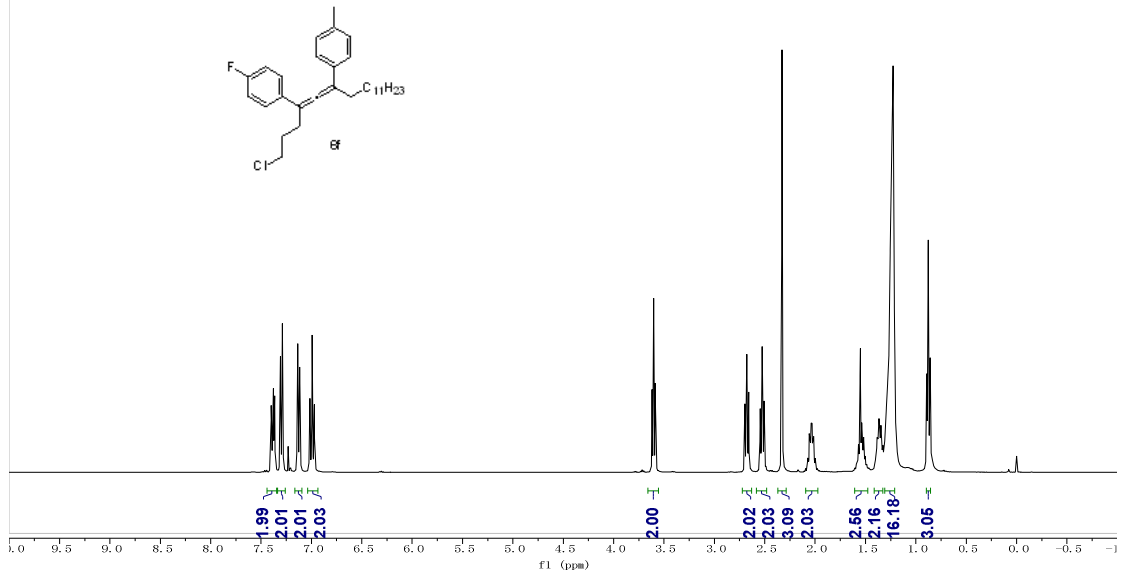

yeq-7-103-2.fid

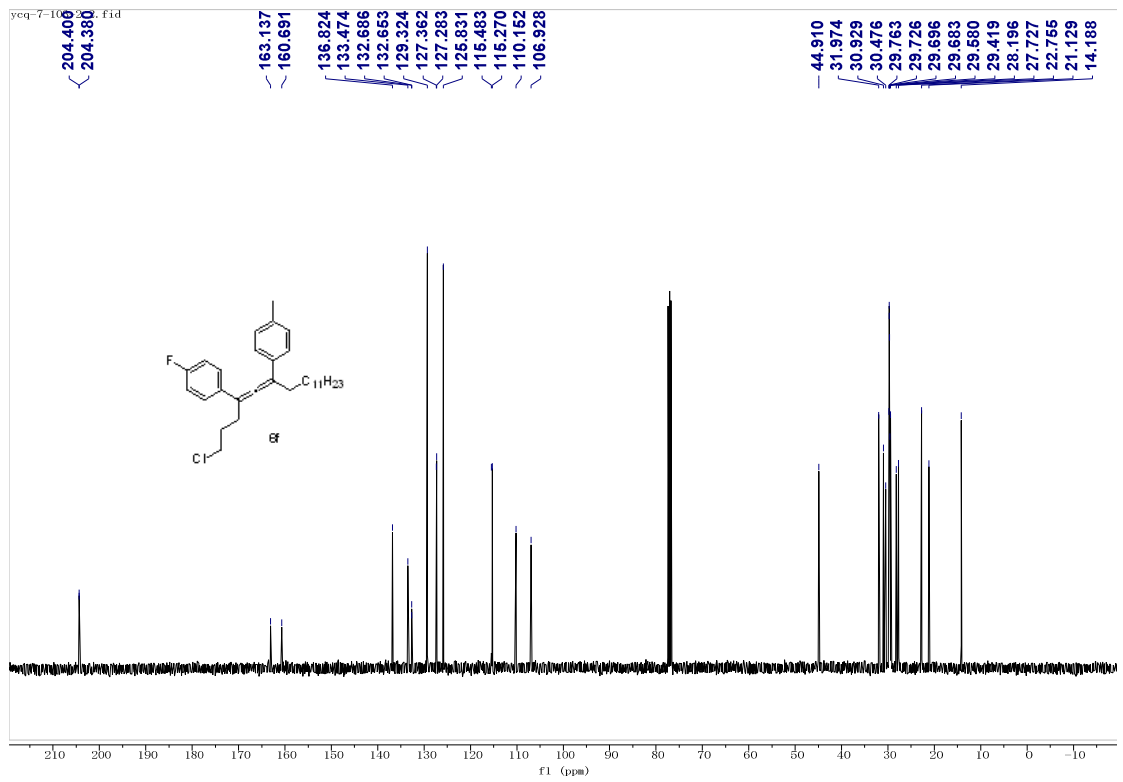

ycq-7-56-1  
single\_pulse

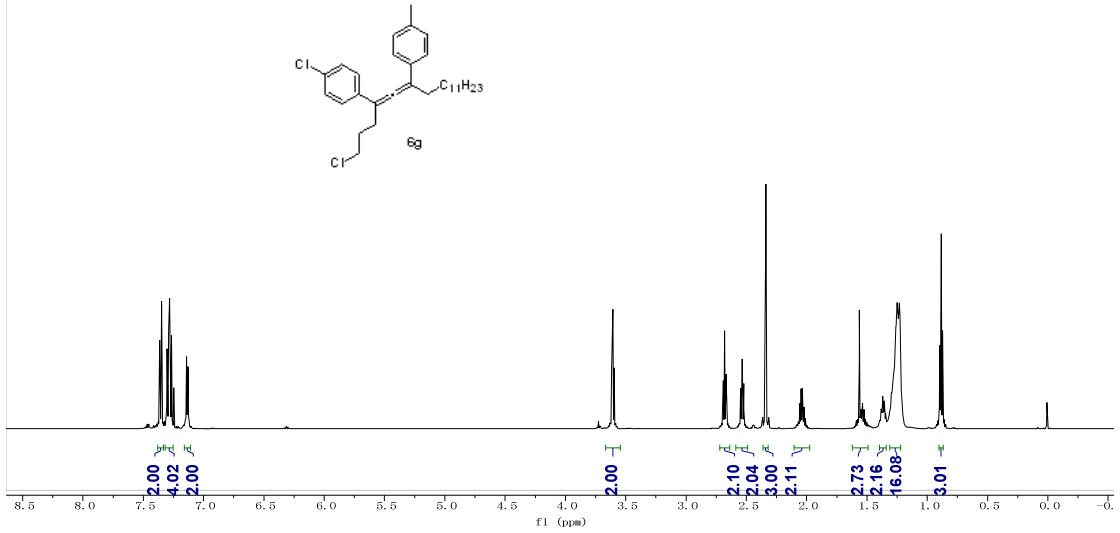

ycq-7-56-1  
single\_pulse decoupled gated NOE

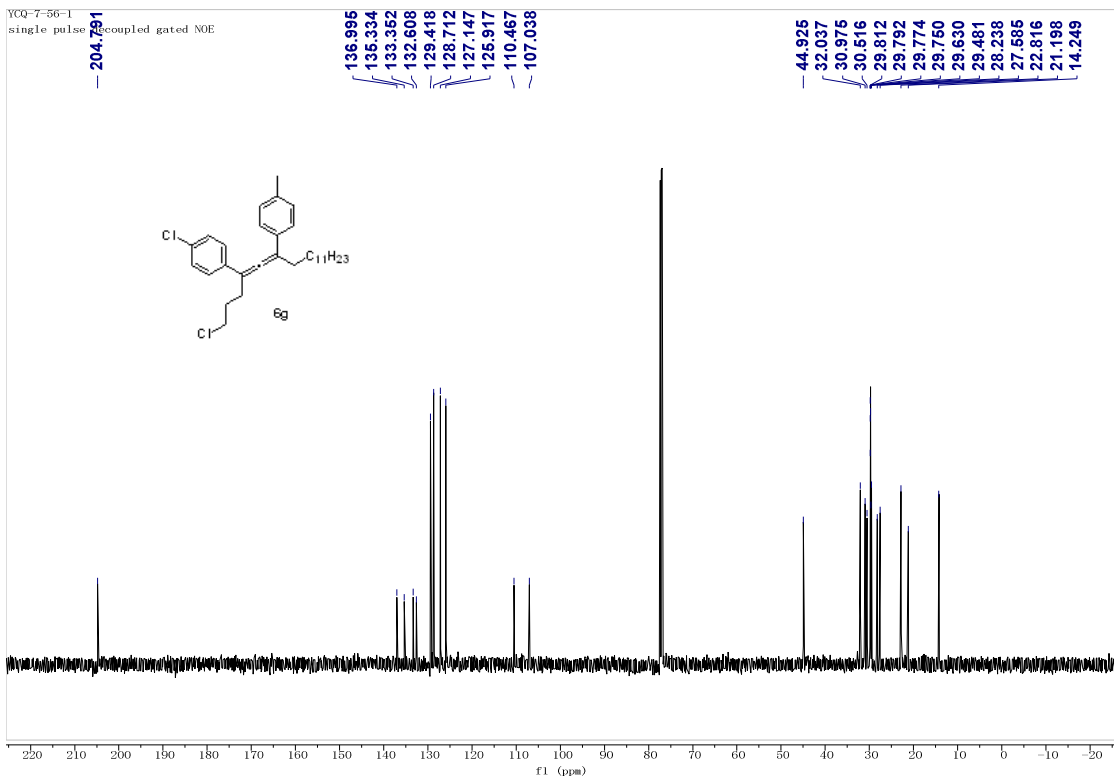



YCO-7-63-2  
single\_pulse

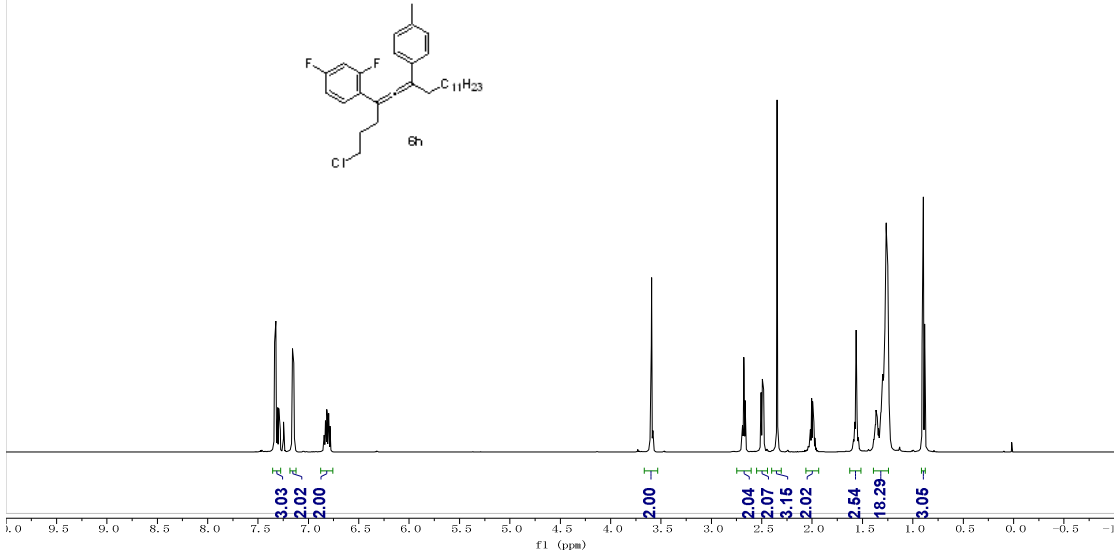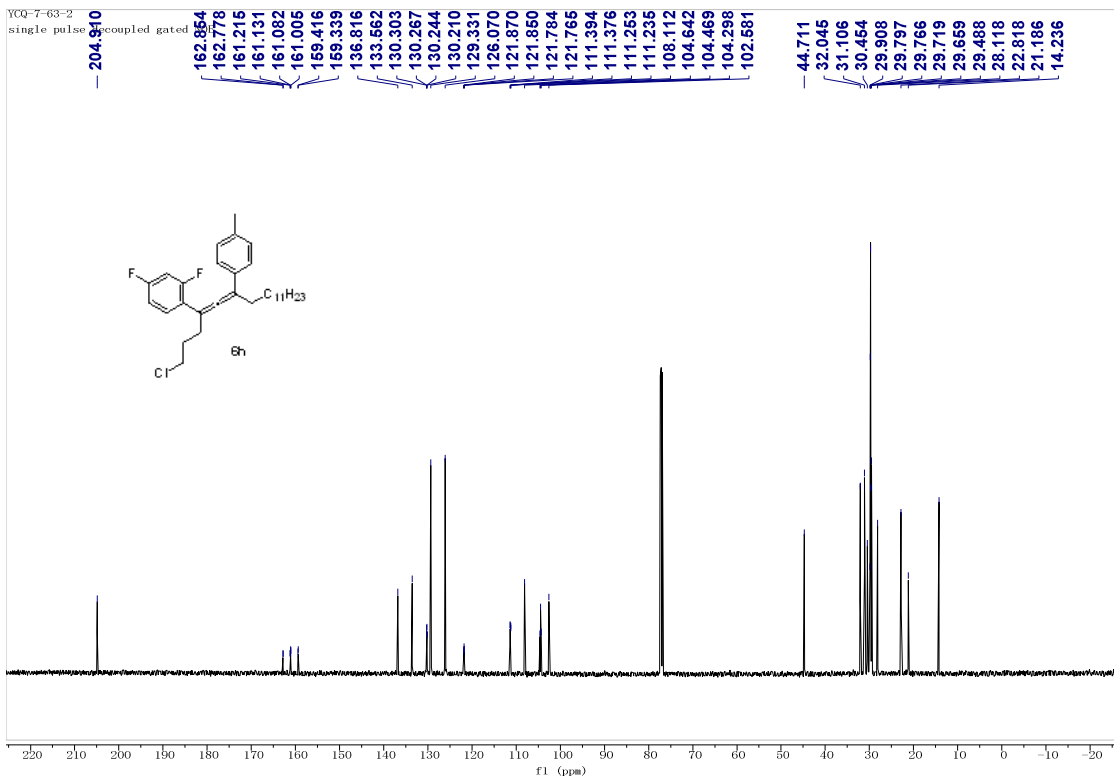

ycq-7-63-5  
single\_pulse

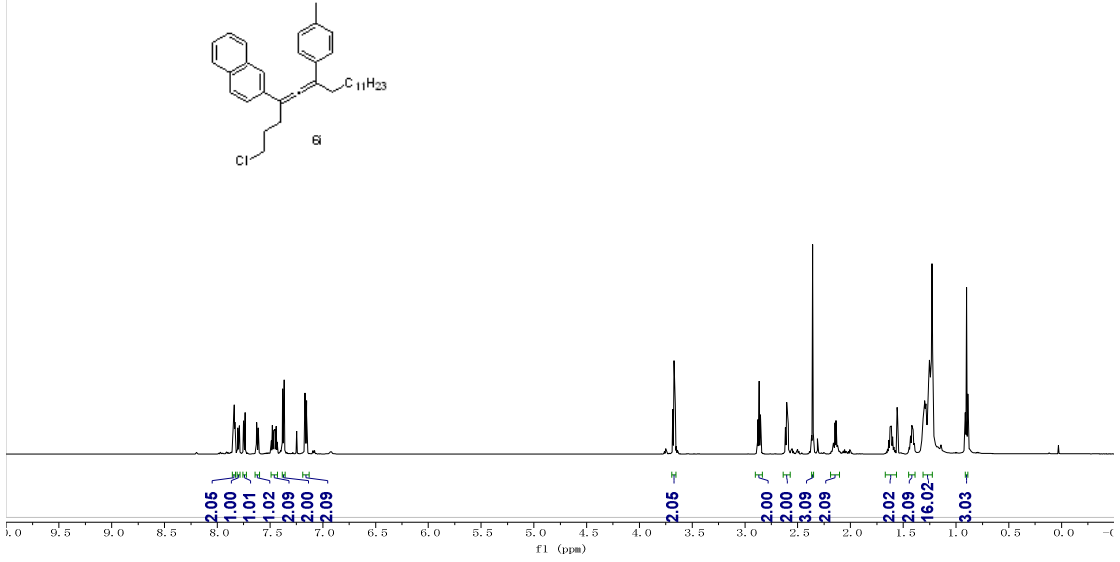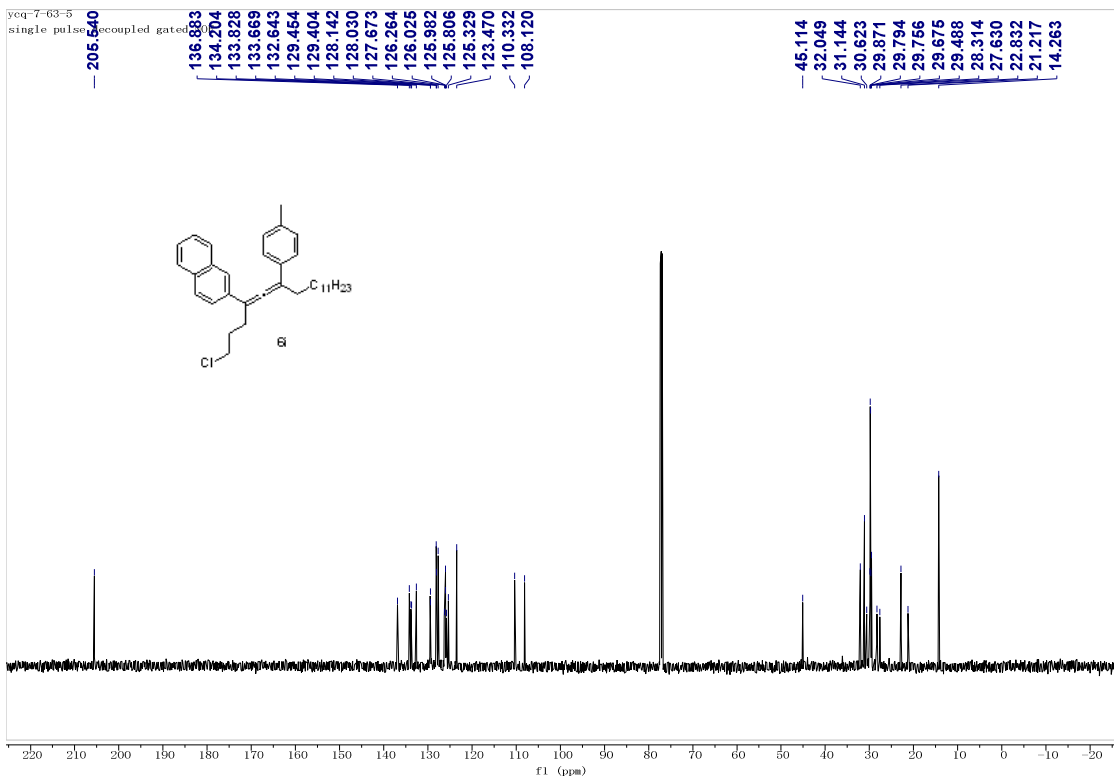

YQ-7-67-3  
single\_pulse

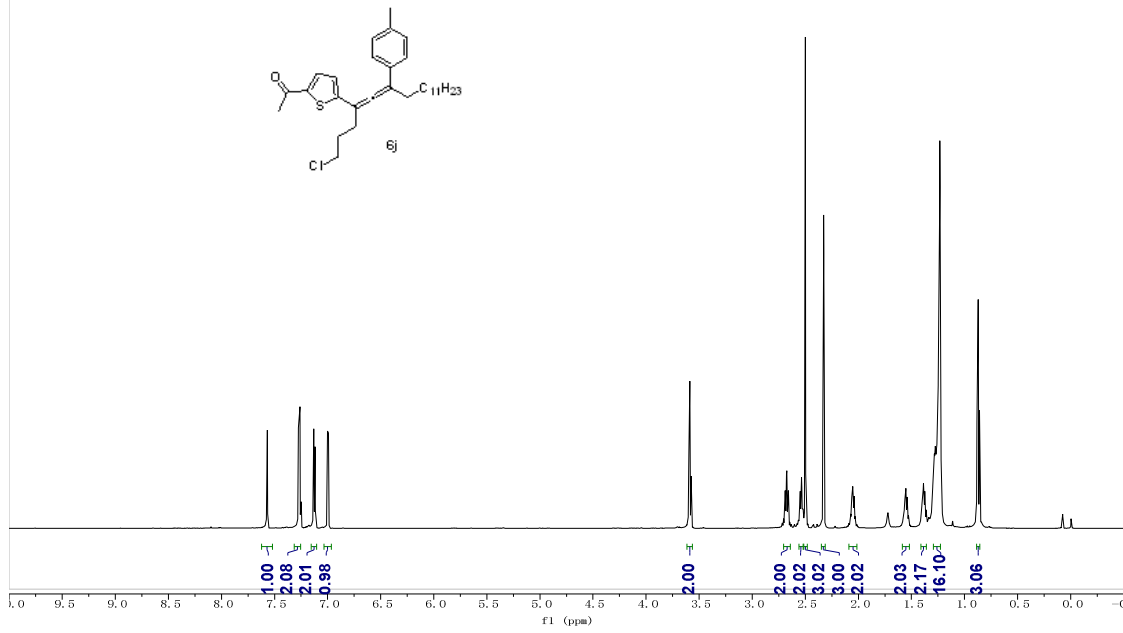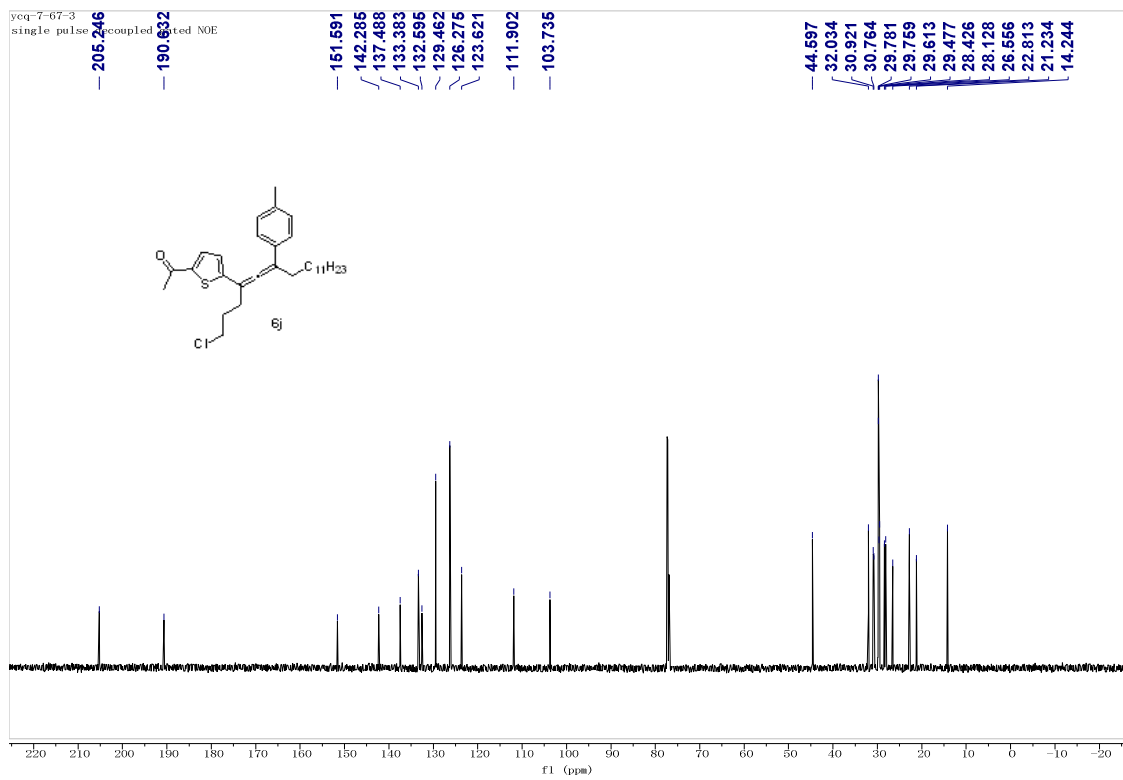



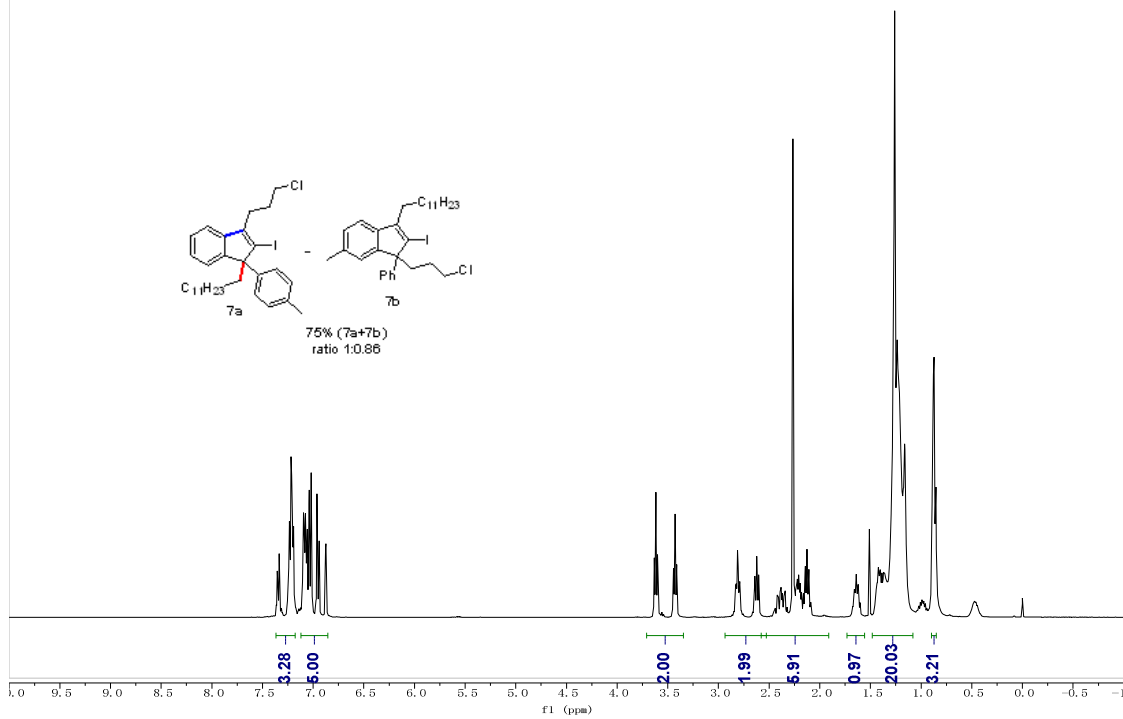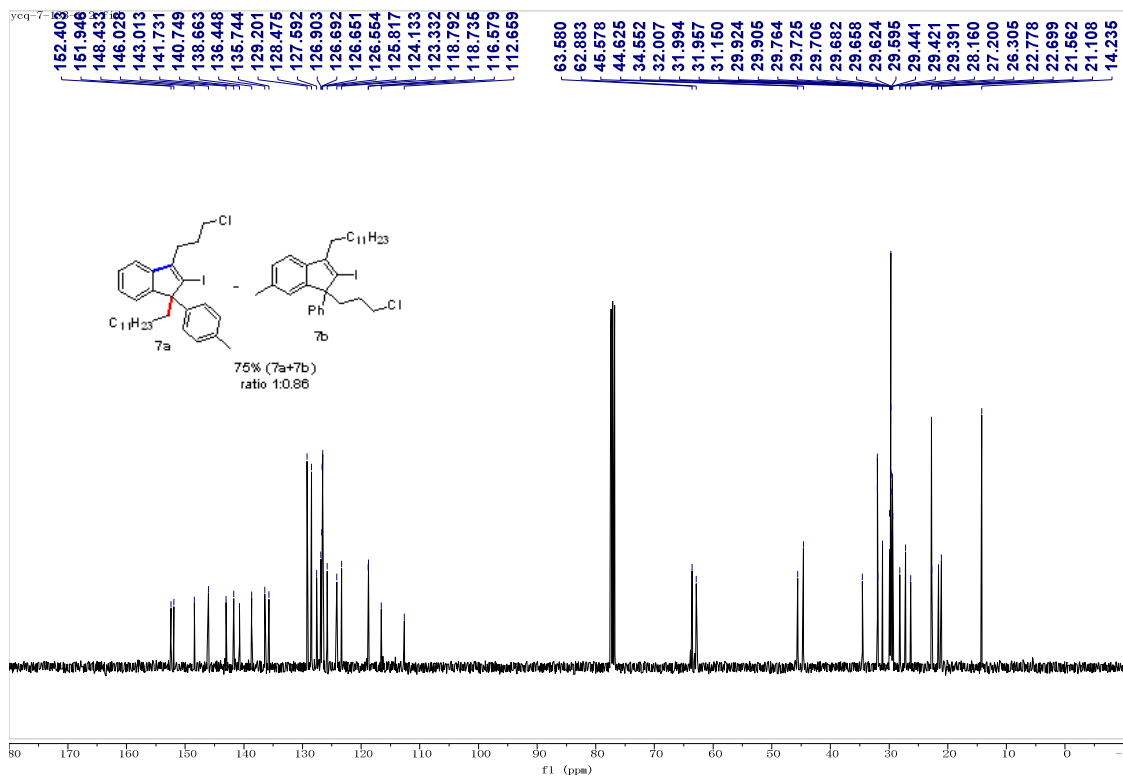

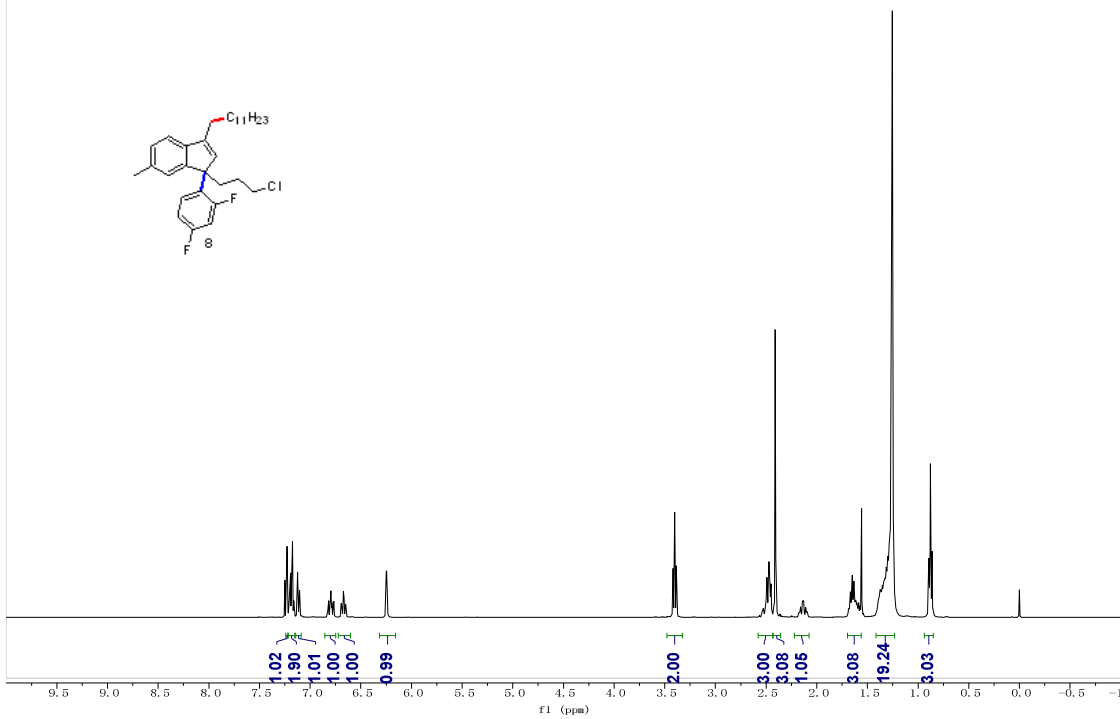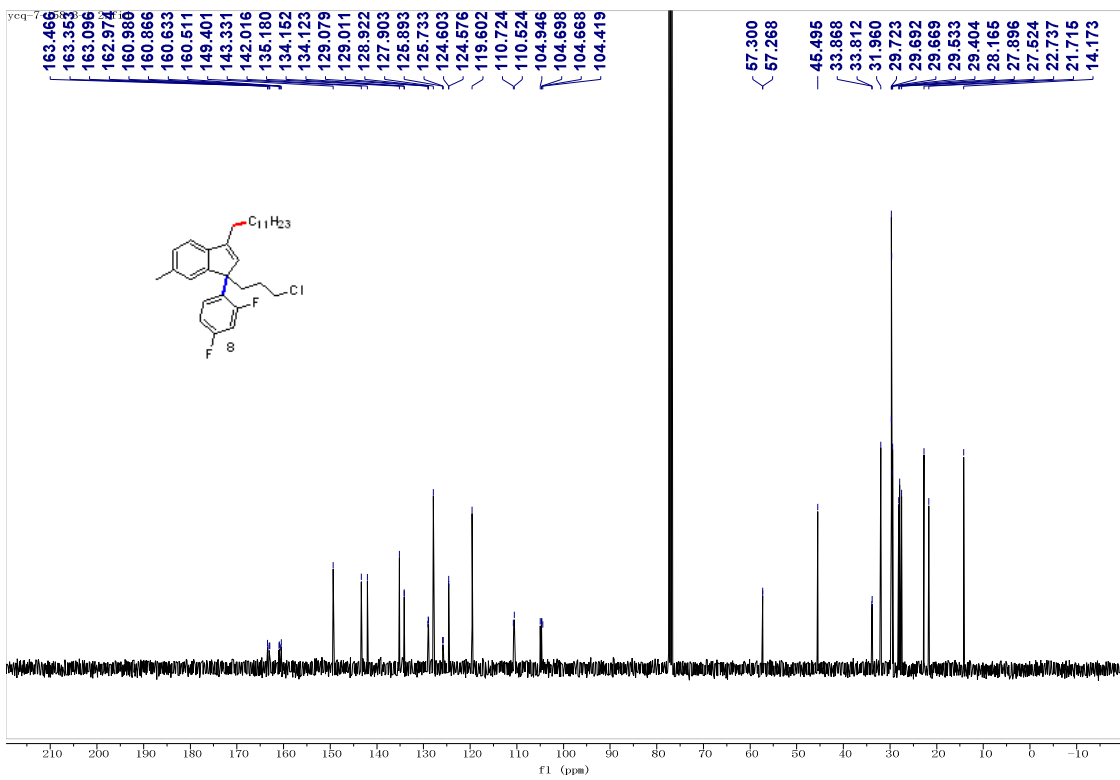

ycq-8-11-1.1.fid

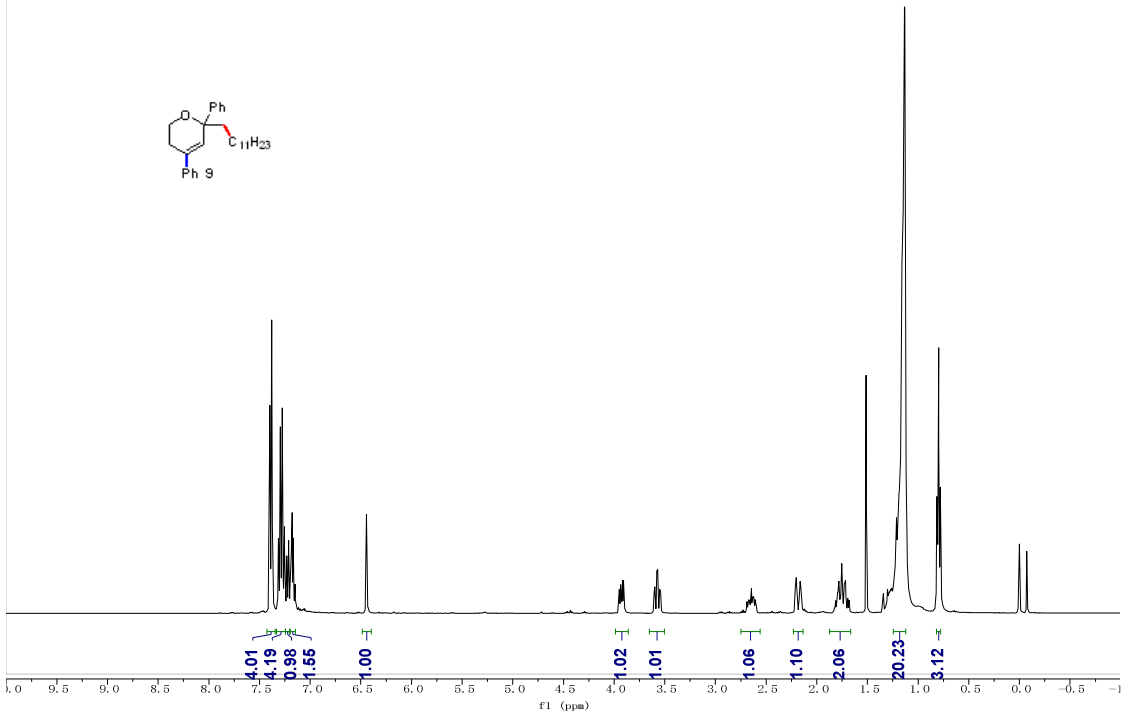

ycq-8-11-1.2.fid

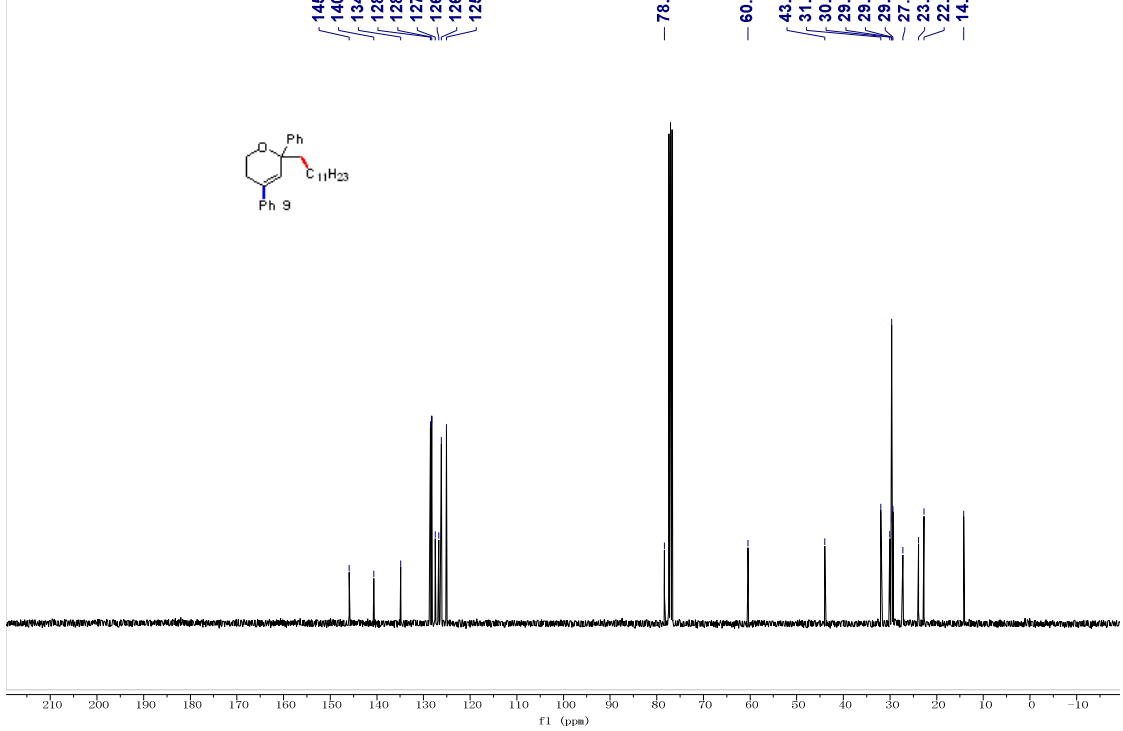

ycq-8-16-1.1.fid

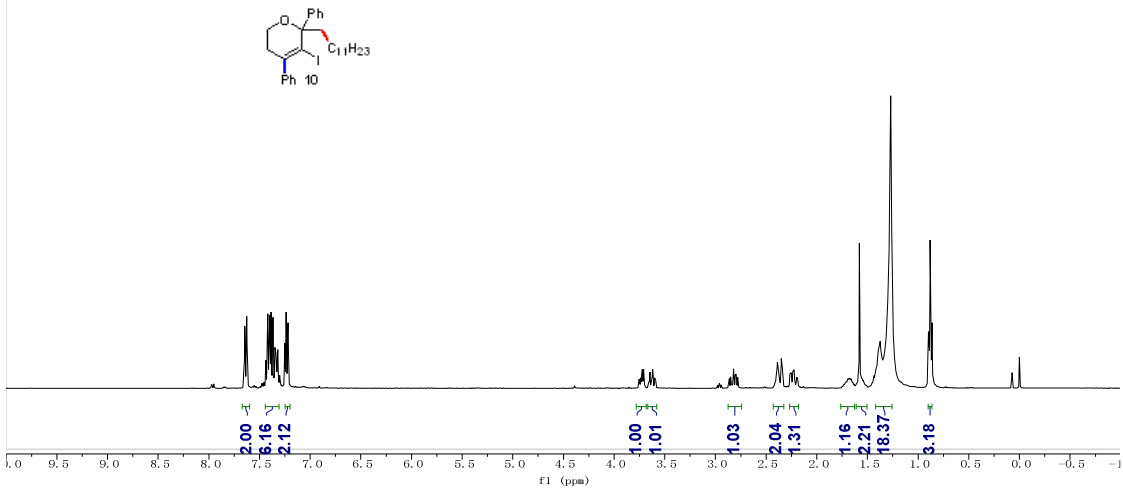

ycq-8-16-1.2.fid

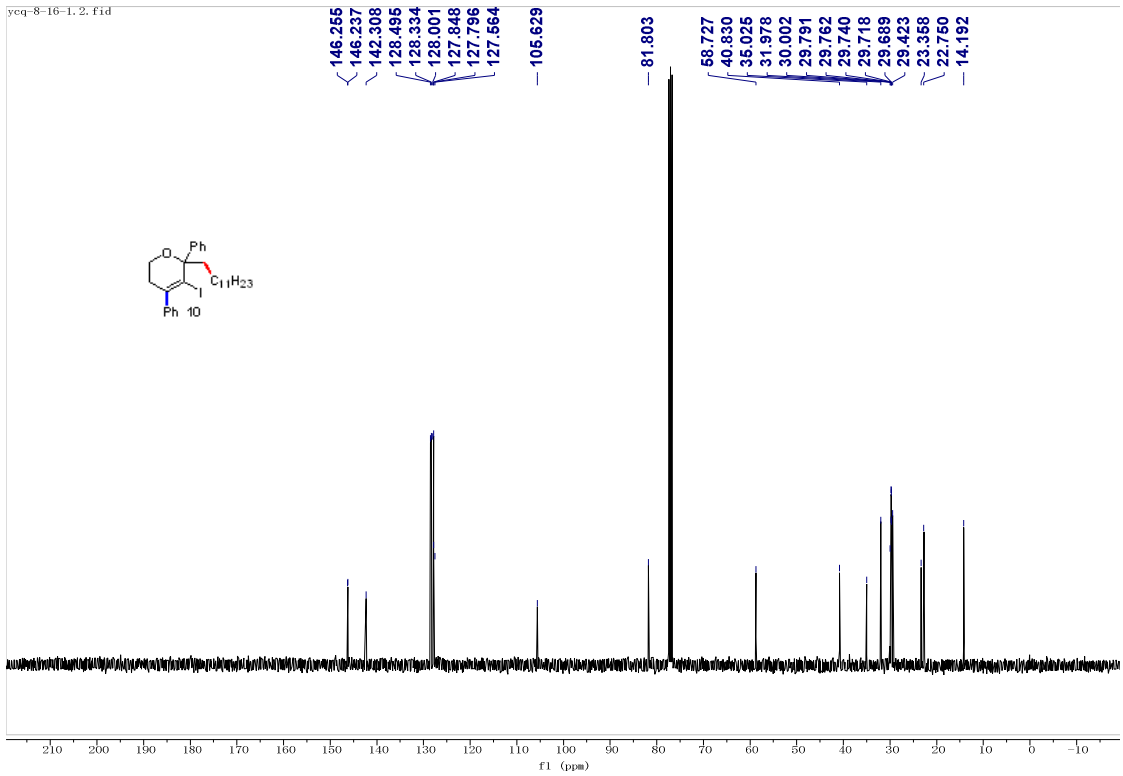



ycq-7-124-2.1.fid

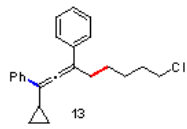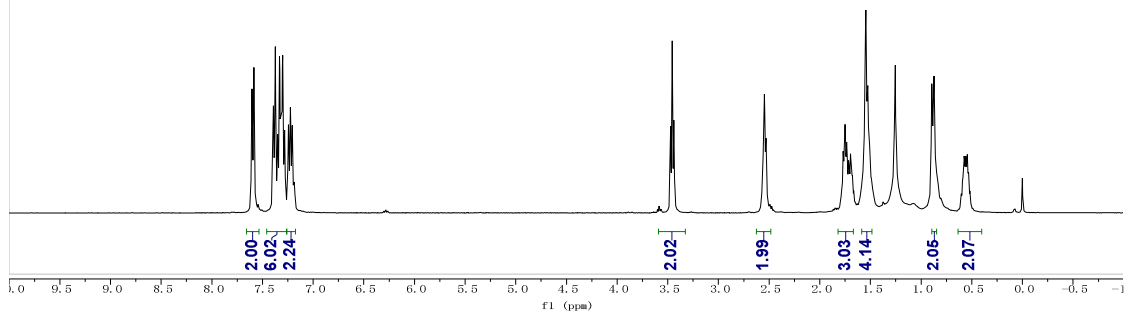

ycq-7-124-2.fid

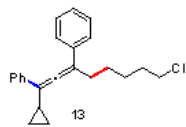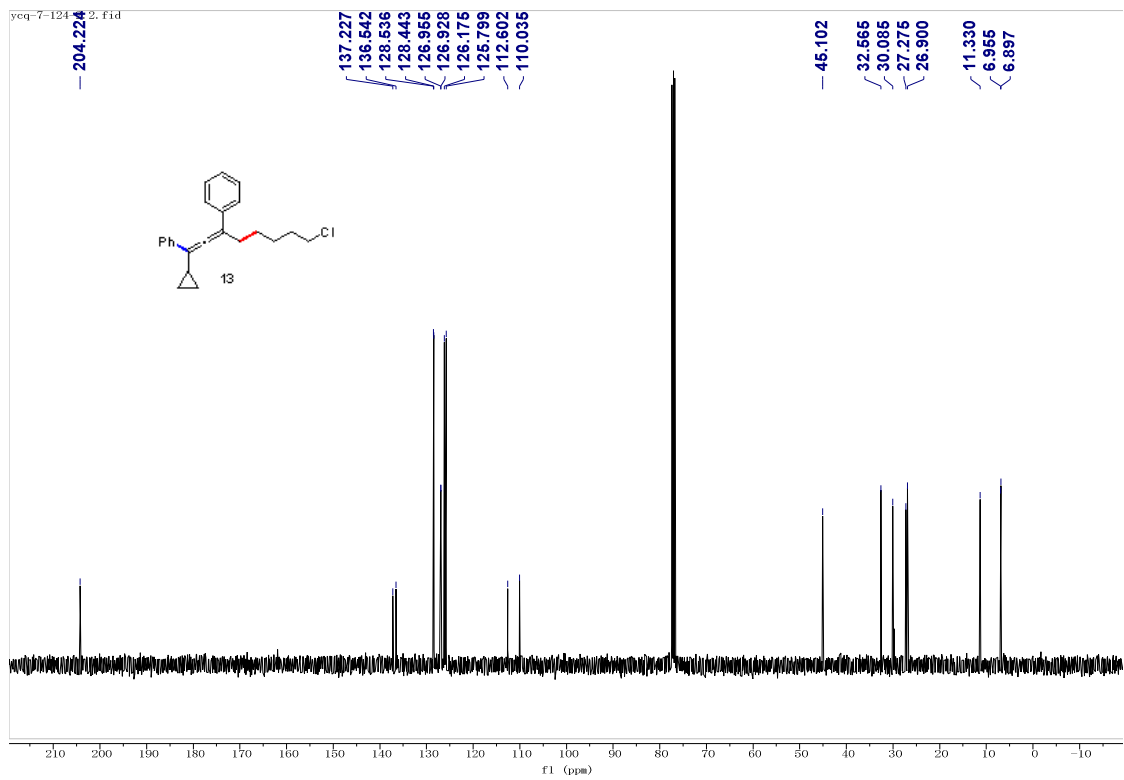

yeq-7-147-1.1.fid

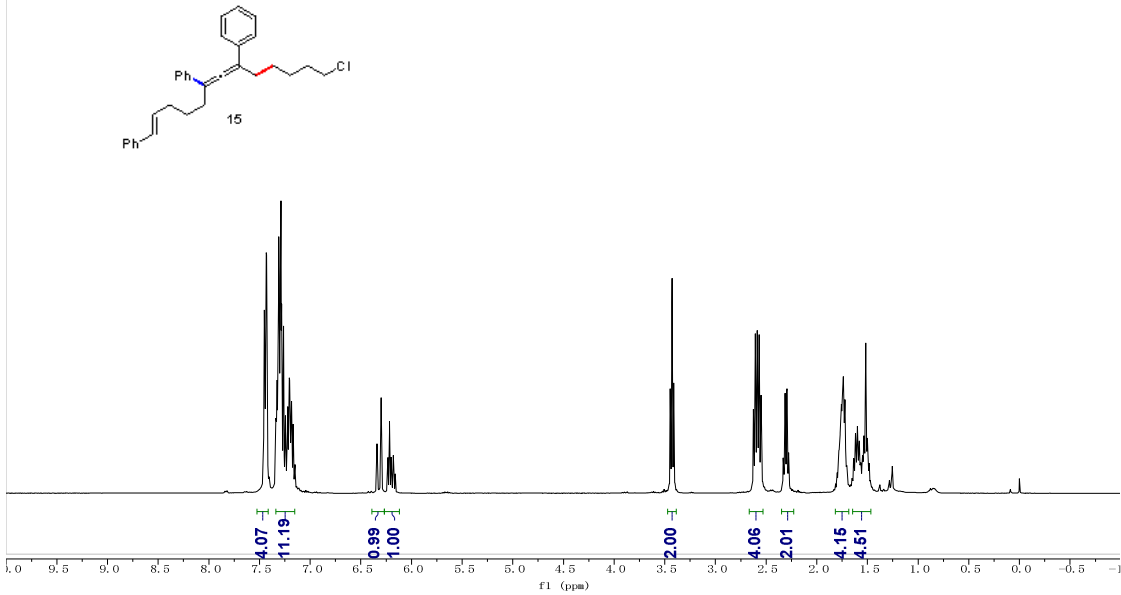

yeq-7-147-2.fid

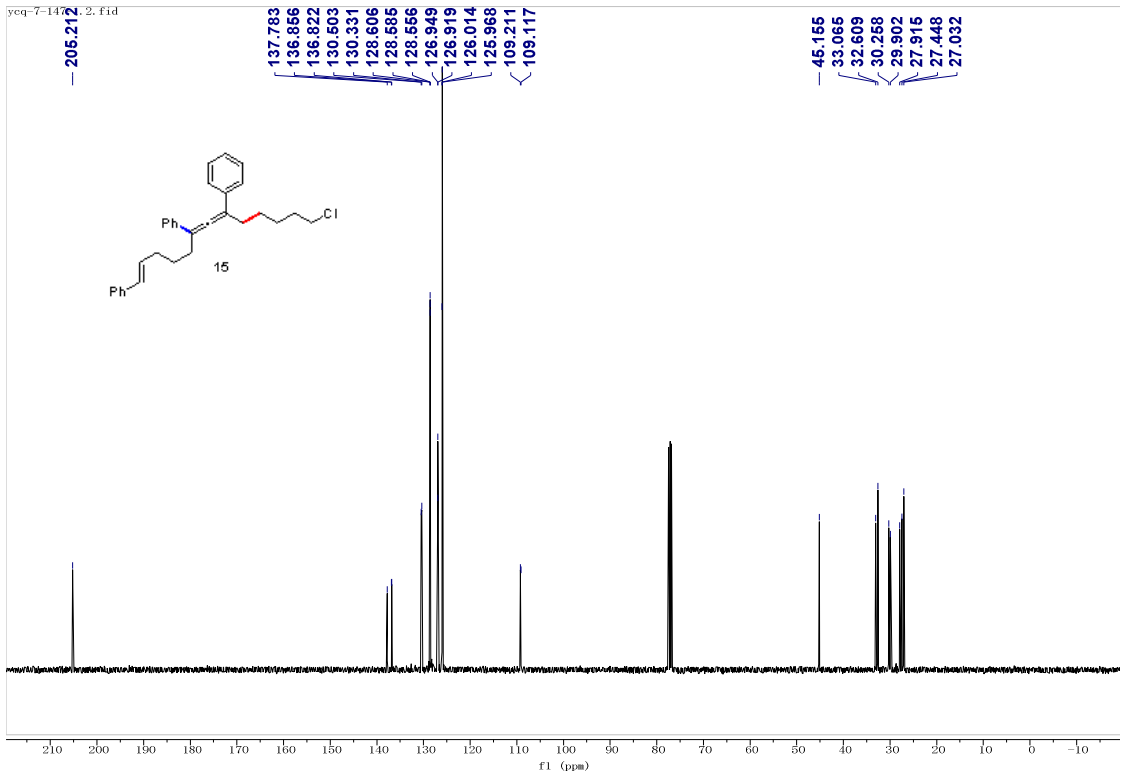

yeq-8-22-1-2.1.fid

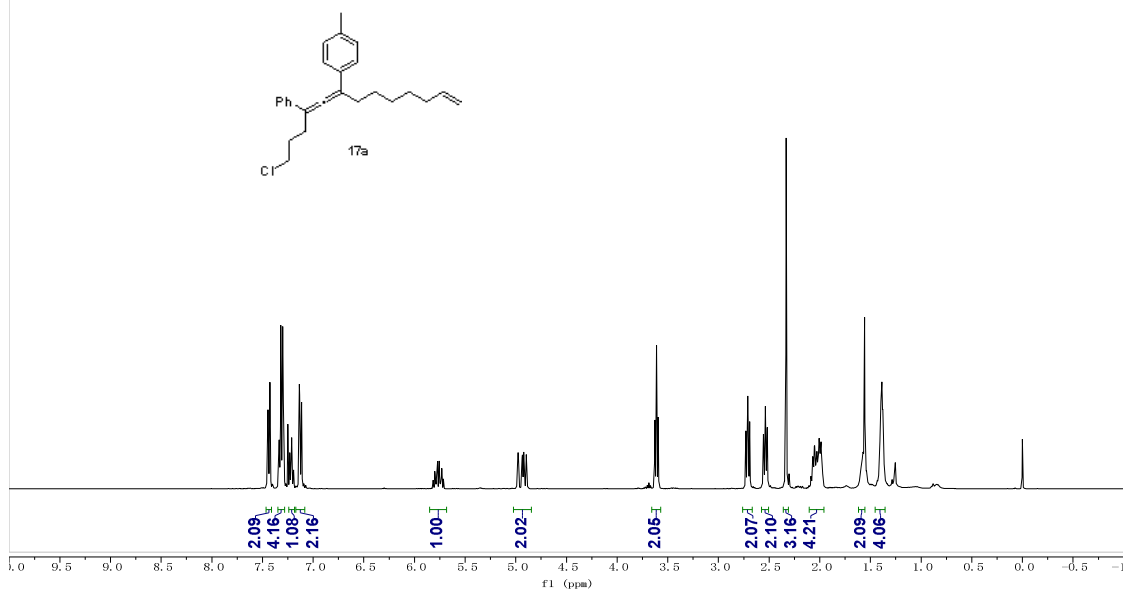

yeq-8-22-1-2.2.fid

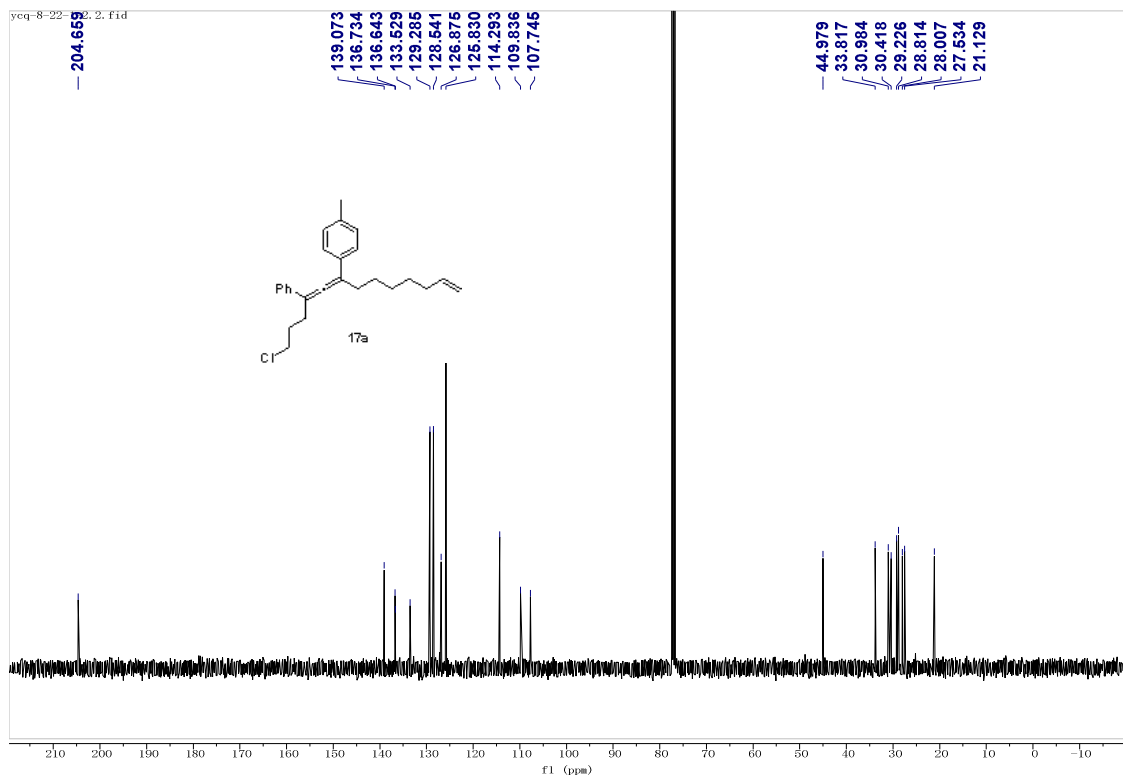

yeq-8-22-1-1.1.fid

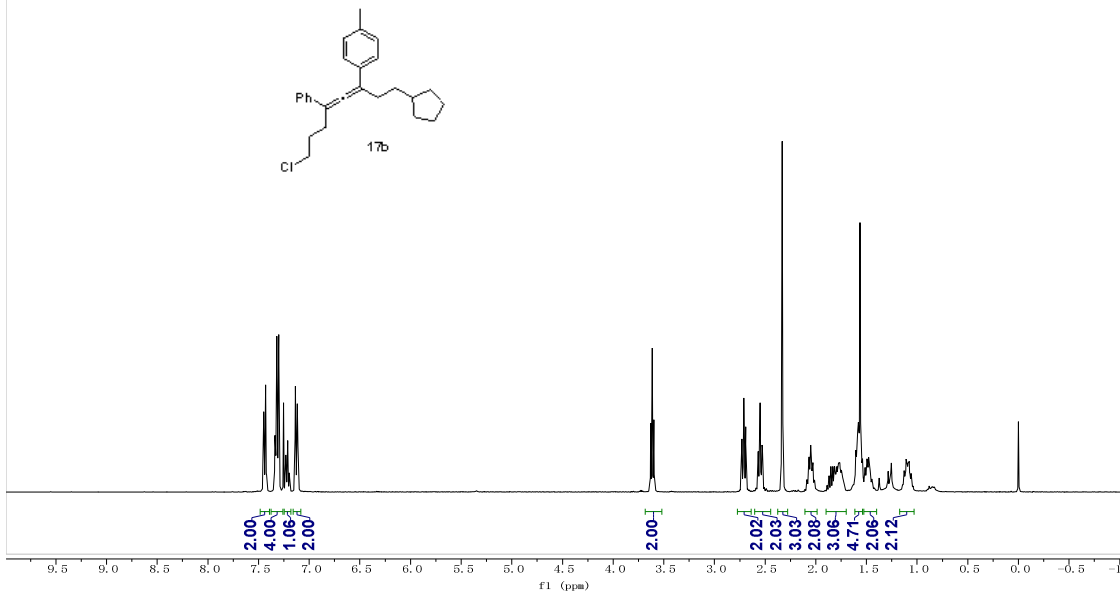

yeq-8-22-1.2.fid

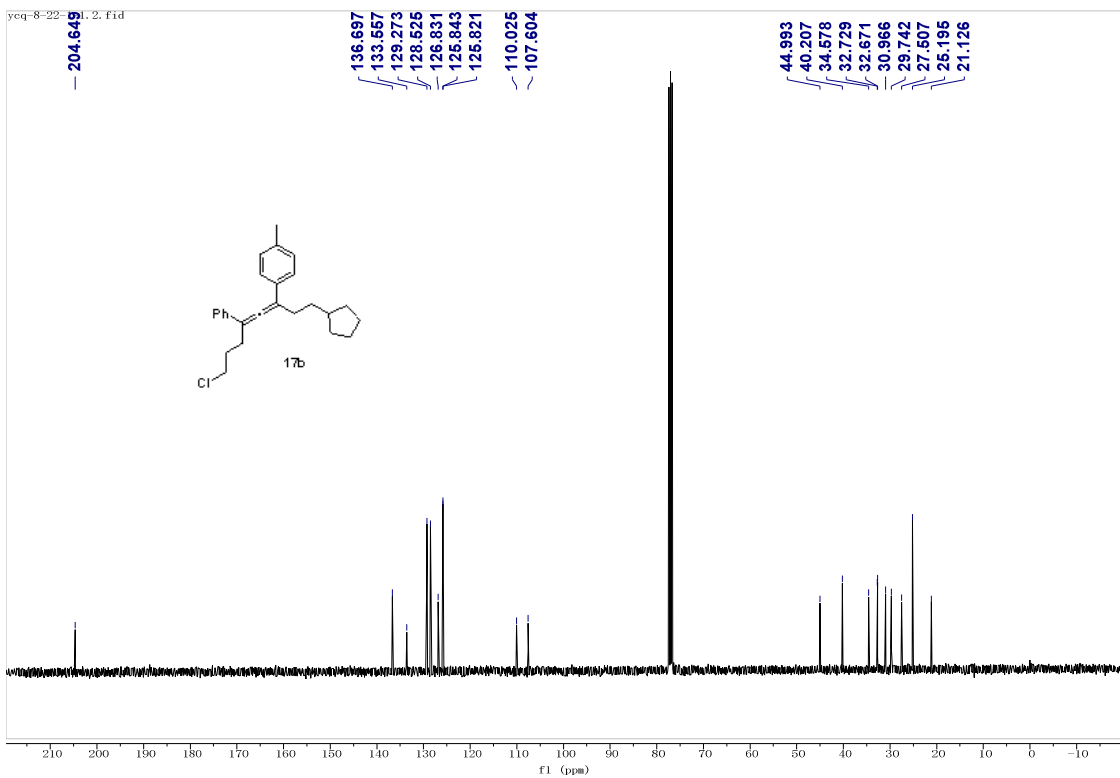

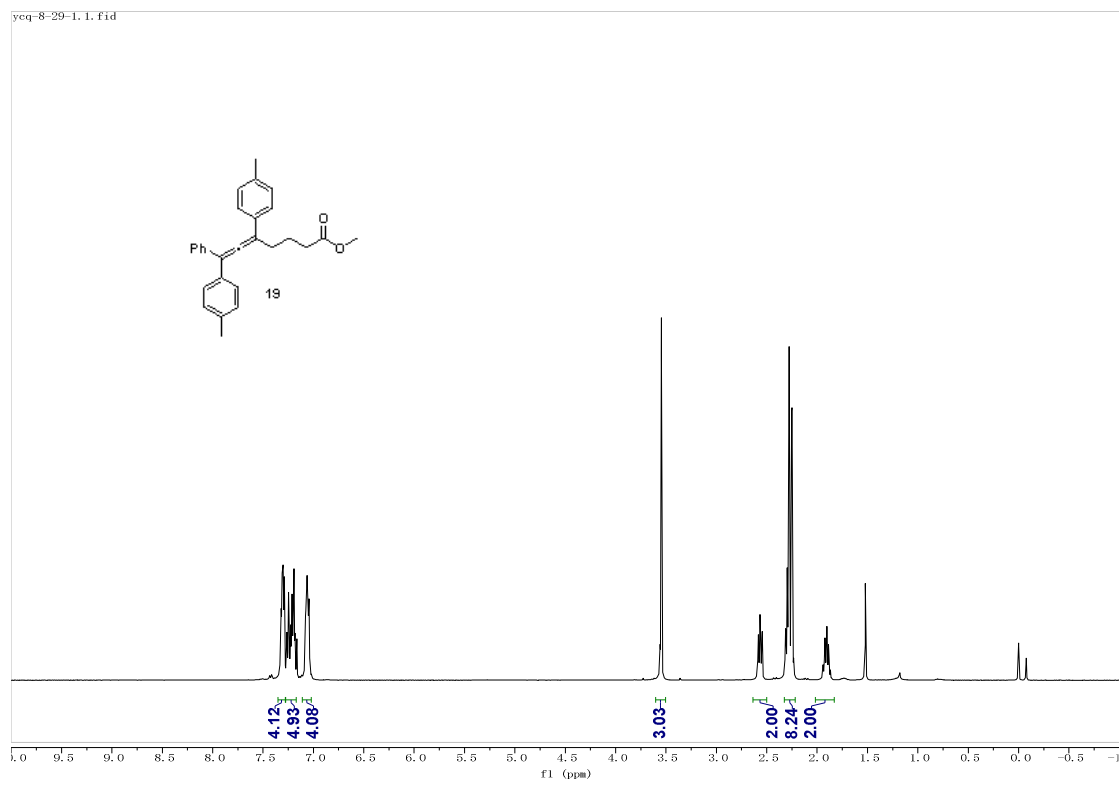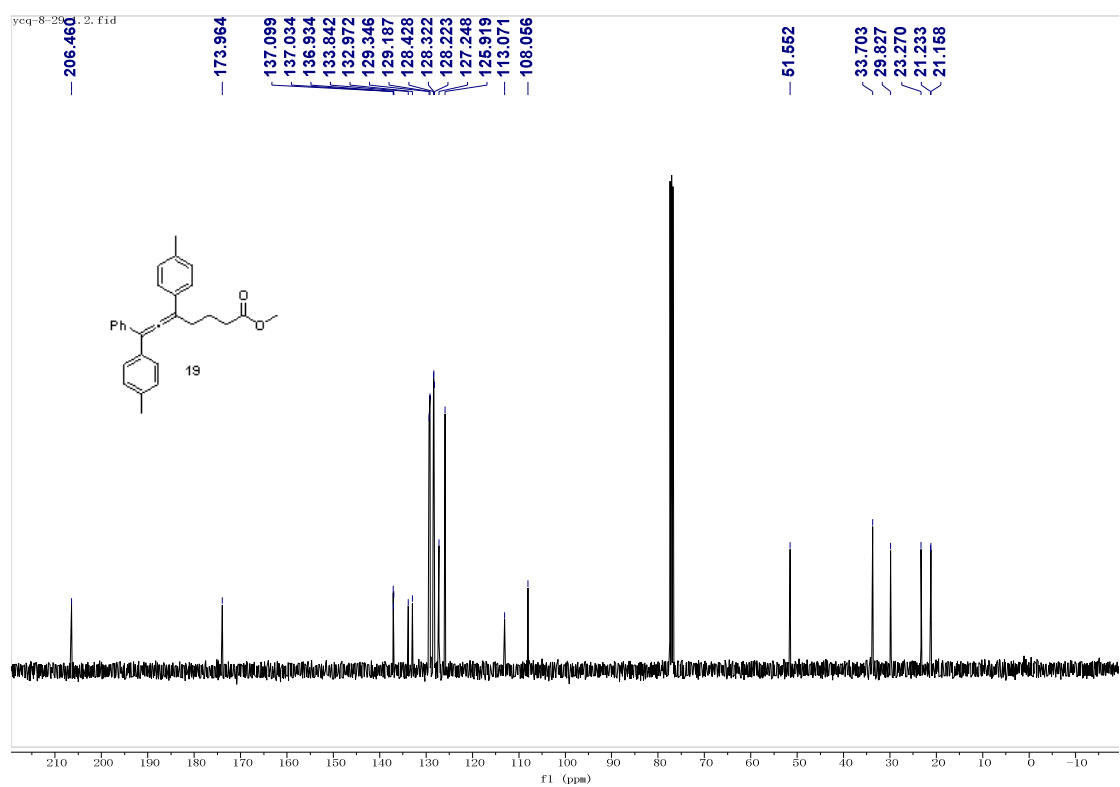

ycq-8-27-1.1.fid

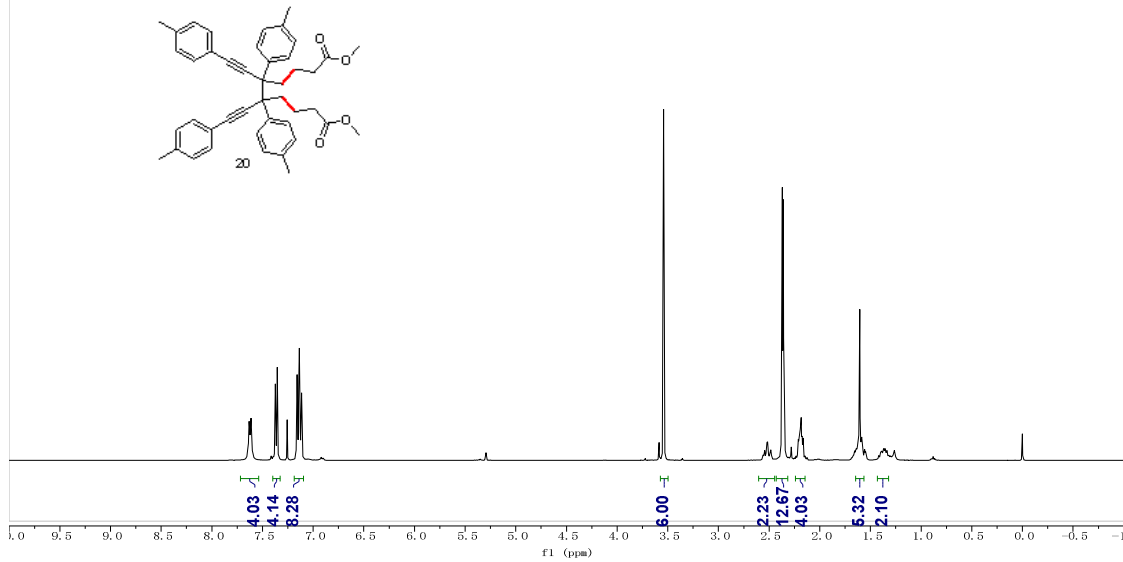

ycq-8-27-1.2.fid

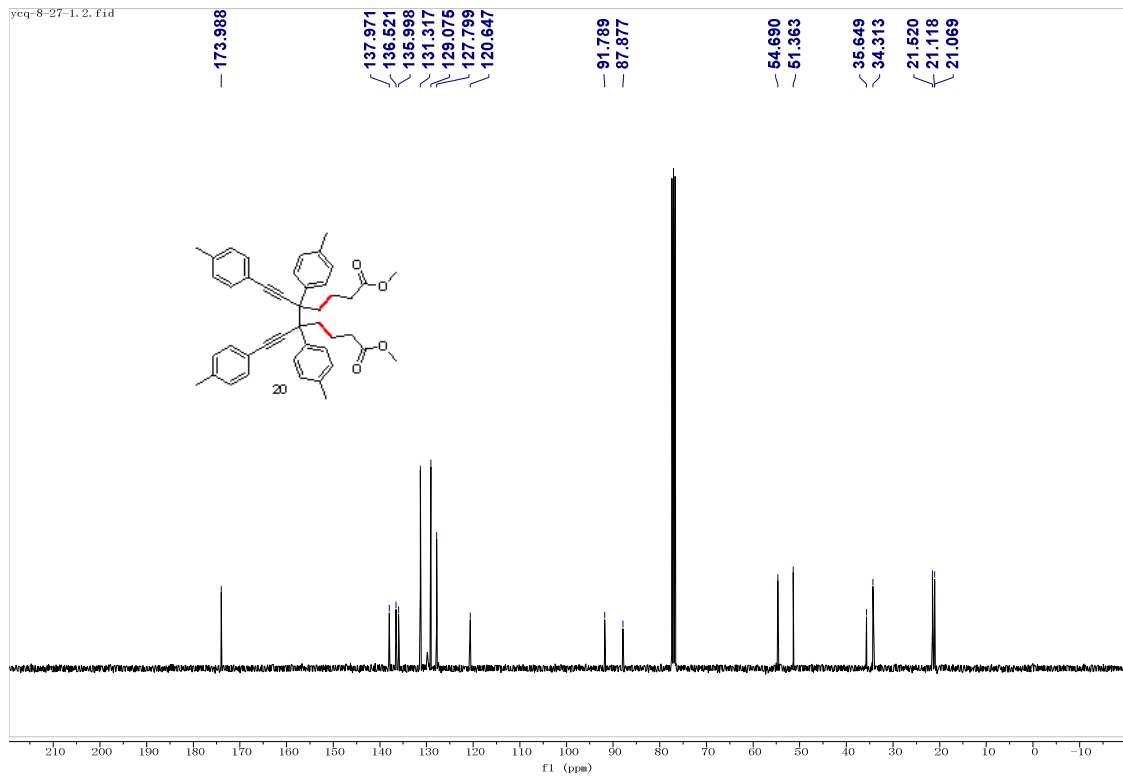

Supplement: c8sc05689g1.pdf [file c8sc05689g1.pdf]
